# Supplementary material for: A mosquito small RNA genomics resource reveals dynamic evolution and host responses to viruses and transposons
Source: HighWire-hosted journal article supplement (doi:10.1101/gr.265157.120), 2021-01-08
Supplement: SupplementalFigS6.pdf [file SupplementalFigS6.pdf]

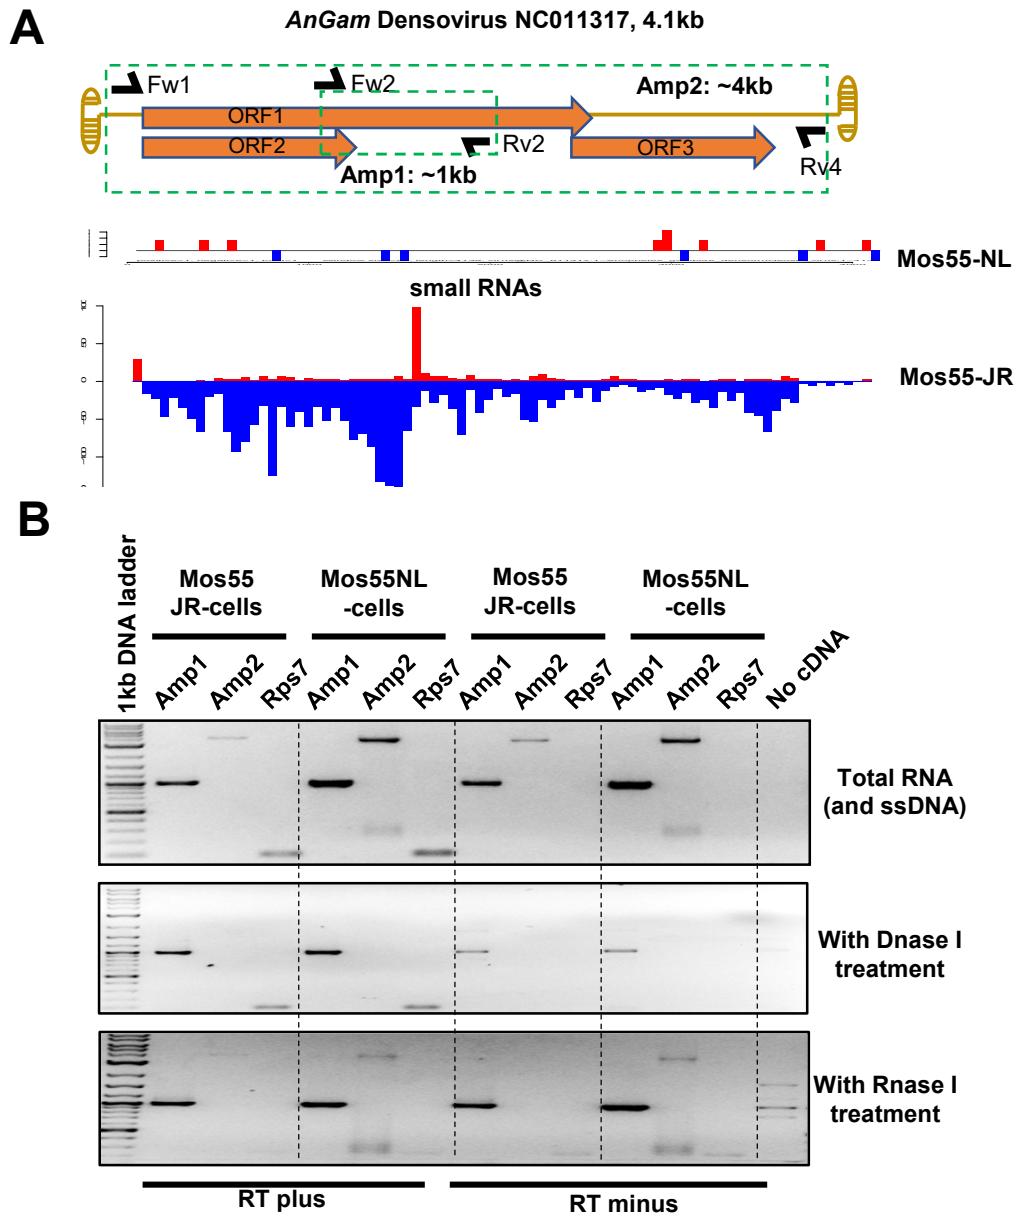

**Figure S6. *AnGam* dengrovirus infection status of Mos55 cells.** (A) Schematic of primers used to detect DNA and RNA copies of *AnGam* dengrovirus NC011317, and the diagrams of viral small RNAs mapping to *dengrovirus* between Mos55-NL and Mos55-JR cells, which are independent isolates from the Lau and Rasgon labs, respectively. (B) RT-PCR results of amplicons from input of total RNA from Mos55-NL and Mos55-JR cells, with also further treatments with DNase I or RNase I. Amp1 and Amp2 are noted in (A), while Rps7 is a ribosomal protein 7 housekeeping gene as a control mRNA.
