# Supplementary material for: A mosquito small RNA genomics resource reveals dynamic evolution and host responses to viruses and transposons
Source: HighWire-hosted journal article supplement (doi:10.1101/gr.265157.120), 2021-01-08
Supplement: SupplementalFigS10.pdf [file SupplementalFigS10.pdf]

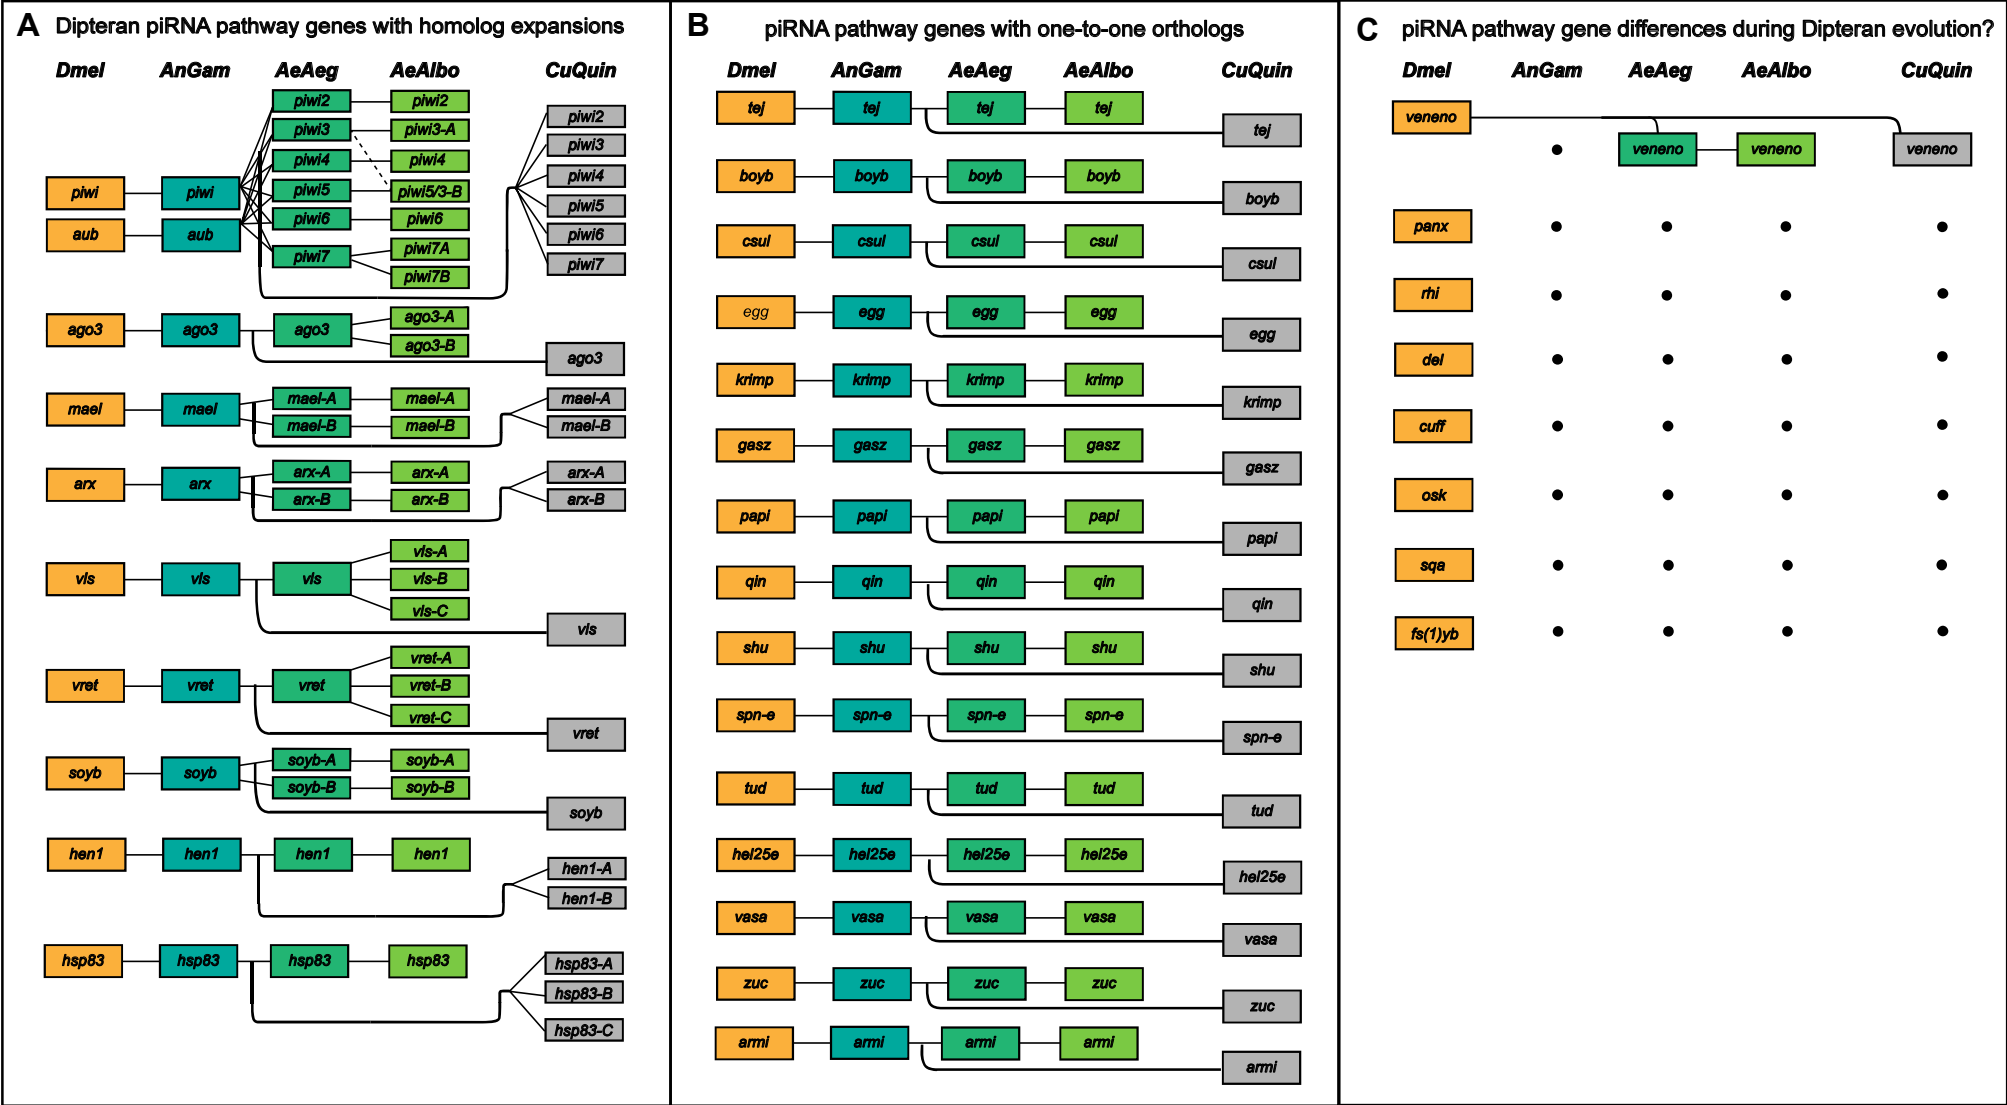

**Figure S10. Diagram of the piRNA pathway genes' conservation between *Drosophila* and mosquitoes.** (A) Gene sets that have expanded families in culicine mosquitoes. (B) Gene sets that have just one-to-one orthologs. (C) Genes that have been lost in a mosquito lineage.
