# Supplementary material for: A mosquito small RNA genomics resource reveals dynamic evolution and host responses to viruses and transposons
Source: HighWire-hosted journal article supplement (doi:10.1101/gr.265157.120), 2021-01-08
Supplement: SupplementalTableS1.xlsx [file SupplementalTableS1.xlsx]

## Sheet: Table 1.
	Table 1. Characteristics and culture conditions of the eight mosquito cell lines and TE annotations summaries analyzed in this study.
	Characteristics and culture conditions of the eight mosquito cell lines analyzed in this study. This table only lists the main name of the cell line but the origins of certain cell lines and tissues throughout the study are further delineated with a suffix of initials of the lab providing the mosquito sample. Lower table summarizes the additional TE annotations curation process as detailed in Fig…
	Cell line	Species	Main Media	Approx. growth rate (in main media, +≈72hr, ++≈72hr, +++≈24hr)		TC plastic adherence (in main media, +≈easy to strip by pipetting, ++≈harder to strip, +++≈requires extensive protease treatment)	Historical origin	Citations
	Sua5b	AnGam	Shield & Sang M3, 10% FBS	+		+++	Larvae	Marhoul et al, Trans R Soc Trop Med Hyg. 1972
	Mos55	AnGam	Shield & Sang M3, 10% FBS	+++		+	Larvae	Muller et al, J Biol Chem. 1999
	Aag2	AeAeg	Shield & Sang M3, 10% FBS; DMEM high glucose + 5% TPB, 10% FBS	+++		++	Embryos	Lan & Fallon, Am J Trop Med Hyg. 1990
	CCL-125	AeAeg	DMEM low glucose, 20% FBS	+		+++	Larvae	Wikan et al, J Virol Methods. 2009; Singh, Curr Sci. 1967
	C6/36	AeAlbo	DMEM high glucose, 10% FBS	+++		+	Larvae	Igarashi, J.Gen Virol, 1978; Singh, Curr Sci. 1967
	C7/10	AeAlbo	Shield & Sang M3, 10% FBS	+++		+	Larvae	Lan et al, In Vitro Cell Dev Biol Anim. 1993; Igarashi, J.Gen Virol, 1978
	U4.4	AeAlbo	Shield & Sang M3, 10% FBS	+++		+	Larvae	Condreay & Brown, J Virol. 1986; Igarashi, J.Gen Virol, 1978
	Hsu	CuQuin	DMEM low glucose, 20% FBS	+		+++	Ovaries	Hsu et al, In Vitro Cell Dev Biol Anim. 1993
		Species	Original genome TE annotations source	Original number of TE entries	Percentage of genome covered by original TE list	TE Reduction process								Reduced number of TEs	Percentage of genome covered by reduced TE list
		AnGam	PEST4 on VectorBase, https://legacy.vectorbase.org/organisms/anopheles-gambiae/pest/agamp4 and PEST3 on NCBI, https://www.ncbi.nlm.nih.gov/assembly/GCF_000005575.2/	3607	0.134	Remove Non-AnGam entries, Retrieve family classification from Repbase and TEFam entries, and add LTR to the 5’ “I” for Repbase entries, Prioritize Repbase entries, merge similar NCBI entries with BLAT (0.9 similarity), Merge EMBL entries to list.								555	0.129
		CuQuin	CpipJ2 on VectorBase, https://legacy.vectorbase.org/organisms/culex-quinquefasciatus	3730	0.496	Remove Non-CuQuin entries, Retrieve family classification from Repbase and TEFam entries, and add LTR to the 5’ “I” for Repbase entries , Use MeShClust (0.55 similarity) to reduce redundancy within each group of Repbase, TEFam, NCBI, Vectorbase, and Recon entries, Prioritize Repbase entries, merge TEFam entries, Merge NCBI entries to list, Merge VectorBase entries to list, Merge Recon entries las…								751	0.489
		AeAeg	AaegL5 on VectorBase, https://legacy.vectorbase.org/organisms/aedes-aegypti/lvp_agwg/aaegl5 and Aaegl5.0 on NCBI, https://www.ncbi.nlm.nih.gov/genome/44?genome_assembly_id=322291	4718	0.670885	Remove Non-AeAeg entries, Retrieve family classification from Repbase and TEFam entries, and add LTR to the 5’ “I” for Repbase entries, Use MeShClust (0.55 similarity) to reduce redundancy within each group of Repbase, TEFam, NCBI, Vectorbase, and Recon entries, Prioritize Repbase entries, merge TEFam entries, Merge NCBI entries to list, Merge VectorBase entries to list, Merge Recon entries last …								1242	0.542171
		AeAlbo	Custom run of RepeatModeler v2 on Prim1 on NCBI, https://www.ncbi.nlm.nih.gov/genome/45?genome_assembly_id=595527	8556	0.853	From RepeatModeler v2 output, use CD-HIT (0.55 similarity) to reduce redundancy within each group into Centroids. Filter out entries with repeats centroid < 5RPM small RNAs AND are <500bp long.								3098	0.652
		DroMel	Flybase Dm6, https://flybase.org/ and UCSC GBrowser Dm6, http://genome.ucsc.edu/	153	0.12	NA								NA	NA
