# Supplementary material for: A mosquito small RNA genomics resource reveals dynamic evolution and host responses to viruses and transposons
Source: HighWire-hosted journal article supplement (doi:10.1101/gr.265157.120), 2021-01-08
Supplement: SupplementalTableS2.xlsx [file SupplementalTableS2.xlsx]

## Sheet: TableS2_AnGam_MetaTable
Table S2. Metatable of AnGam samples and cell lines, and additional tabs of top Genic and Intergenic piRNA clusters.
Sample	Library Size (all replicates)	Percent Genome Mapped	miRNA counts	siRNA counts	piRNA counts	Virus counts	TE counts	Genecentric count	Intergenic counts	StructureRNA_Derived_siRNA	StructureRNA_Derived_piRNA	Source					Sum	Sample	miRNA counts	siRNA counts	piRNA counts	Virus counts	TE counts	Genecentric count	Intergenic counts	StructureRNA_Derived_siRNA	StructureRNA_Derived_piRNA
AnGam_Sua5b_cells	13684837	0.67	172251	541352	756233	1507	32200	80345	76056	326030	94546	AnGam_Sua5b_Mos55					2080520	AnGam_Sua5b_cells	0.0827923	0.2602	0.363483	0.000724338	0.0154769	0.0386177	0.0365562	0.156706	0.0454434
AnGam_Sua5b_rep2	8422050	0.92	396530	205610	334205	137035	58426	65884	173443	9028	3913	AnGam_experiment_20190320					1384074	AnGam_Sua5b_rep2	0.286495	0.148554	0.241465	0.0990084	0.0422131	0.0476015	0.125313	0.00652277	0.00282716
AnGam_Mos55_NL_cells	12860376	0.92	392846	150632	464900	783	118904	47594	359851	2277	1657	AnGam_Sua5b_Mos55					1539444	AnGam_Mos55_NL_cells	0.255187	0.0978483	0.301992	0.000508625	0.0772383	0.0309164	0.233754	0.00147911	0.00107636
AnGam_Mos55_JR	3394477	0.9	341940	140123	450430	53205	115192	54163	338695	6382	4718	AnGam_experiment_20190320					1504848	AnGam_Mos55_JR	0.227226	0.0931144	0.299319	0.0353557	0.0765473	0.0359923	0.225069	0.00424096	0.0031352
AnGam_WholeFemale_sugar_IB	32172525	0.94	299129	140925	562630	6	138170	101141	280334	92399	19691	AnGam_sRNAs_Biryukova_GSE50396			AnGam_GSE50396_Biryukova_BMCGenomics_2015		1634425	AnGam_WholeFemale_sugar_IB	0.183018	0.086223	0.344237	3.67102e-06	0.0845374	0.0618817	0.171518	0.056533	0.0120477
AnGam_WholeFemale_BF_IB	29924502	0.73	140603	462295	474596	130	43965	50967	82183	194119	31594	AnGam_sRNAs_Biryukova_GSE50396			AnGam_GSE50396_Biryukova_BMCGenomics_2015		1480452	AnGam_WholeFemale_BF_IB	0.094973	0.312266	0.320575	8.7811e-05	0.029697	0.0344266	0.0555121	0.131121	0.0213408
AnGam_WholeFemaleAgo1Rnai_IB	8974054	0.97	139487	337355	288964	8	14604	834947	35422	78709	17240	AnGam_sRNAs_Biryukova_GSE50396			AnGam_GSE50396_Biryukova_BMCGenomics_2015		1746736	AnGam_WholeFemaleAgo1Rnai_IB	0.0798558	0.193135	0.165431	4.57997e-06	0.00836074	0.478004	0.020279	0.0450606	0.00986984
AnGam_WholeFemaleAgo2Rnai_IB	23573350	0.93	286059	217210	423744	6	67019	226919	131759	100112	19929	AnGam_sRNAs_Biryukova_GSE50396			AnGam_GSE50396_Biryukova_BMCGenomics_2015		1472757	AnGam_WholeFemaleAgo2Rnai_IB	0.194234	0.147485	0.287722	4.07399e-06	0.0455058	0.154078	0.0894642	0.0679759	0.0135318
AnGam_WholeFemale_PBInfect_IB	41583849	0.77	160999	257768	794369	27	129954	159978	222441	55589	17484	AnGam_sRNAs_Biryukova_GSE50396			AnGam_GSE50396_Biryukova_BMCGenomics_2015		1798609	AnGam_WholeFemale_PBInfect_IB	0.0895131	0.143315	0.441657	1.50116e-05	0.0722525	0.0889454	0.123674	0.0309067	0.00972085
AnGam_larvae_male_TN	20027916	0.98	11437	216204	442868	55	1223	89181	8358	270267	50845	AnGam_sRNAs_Castellano_PMC4345017			AnGam_TFN_Larvae_adult_PMC4345017F_Castellano_BMCGenomics_2015		1090438	AnGam_larvae_male_TN	0.0104884	0.198273	0.406138	5.04384e-05	0.00112157	0.0817846	0.00766481	0.247852	0.0466281
AnGam_larvae_testes_TN	62713423	0.94	23637	92925	625297	10	8396	205397	21521	121963	49240	AnGam_sRNAs_Castellano_PMC4345017			AnGam_TFN_Larvae_adult_PMC4345017F_Castellano_BMCGenomics_2015		1148386	AnGam_larvae_testes_TN	0.0205828	0.0809179	0.544501	8.70787e-06	0.00731113	0.178857	0.0187402	0.106204	0.0428776
AnGam_larvae_female_TN	25397349	0.98	10242	170657	475776	42	1121	83634	7394	218474	56167	AnGam_sRNAs_Castellano_PMC4345017			AnGam_TFN_Larvae_adult_PMC4345017F_Castellano_BMCGenomics_2015		1023507	AnGam_larvae_female_TN	0.0100068	0.166738	0.464849	4.10354e-05	0.00109525	0.0817132	0.00722418	0.213456	0.054877
AnGam_larvae_ovaries_TN	22823304	0.96	27411	179193	396808	8	4173	209590	16014	199998	43163	AnGam_sRNAs_Castellano_PMC4345017			AnGam_TFN_Larvae_adult_PMC4345017F_Castellano_BMCGenomics_2015		1076358	AnGam_larvae_ovaries_TN	0.0254664	0.166481	0.368658	7.43247e-06	0.00387696	0.194721	0.0148779	0.18581	0.040101
AnGam_adult_testes_TN	15517138	0.97	23882	72012	749224	14	184801	96333	407141	74293	15199	AnGam_sRNAs_Castellano_PMC4345017			AnGam_TFN_Larvae_adult_PMC4345017F_Castellano_BMCGenomics_2015		1622899	AnGam_adult_testes_TN	0.0147156	0.0443724	0.461658	8.62654e-06	0.113871	0.0593586	0.250873	0.045778	0.00936534
AnGam_Testis_TN	20098905	0.96	13200	113547	319818	149	91159	73532	477591	30328	8630	AnGam_experiment_20181221					1127954	AnGam_Testis_TN	0.0117026	0.100666	0.283538	0.000132098	0.080818	0.0651906	0.423414	0.0268876	0.00765102
AnGam_Mcarc_TN	17728127	0.95	286719	96841	183336	184	6855	97111	61006	57732	20421	AnGam_experiment_20181221					810205	AnGam_Mcarc_TN	0.353885	0.119527	0.226283	0.000227103	0.00846082	0.11986	0.075297	0.071256	0.0252047
AnGam_adult_ovaries_sugar_TN	19970368	0.97	44682	28983	936967	0	356264	87320	667177	4740	5996	AnGam_sRNAs_Castellano_PMC4345017			AnGam_TFN_Larvae_adult_PMC4345017F_Castellano_BMCGenomics_2015		2132129	AnGam_adult_ovaries_sugar_TN	0.0209565	0.0135935	0.439451	0	0.167093	0.0409544	0.312916	0.00222313	0.00281221
AnGam_adult_ovaries_blood_TN	15376541	0.97	37084	29683	883286	0	275831	142252	542454	8026	4557	AnGam_sRNAs_Castellano_PMC4345017			AnGam_TFN_Larvae_adult_PMC4345017F_Castellano_BMCGenomics_2015		1923173	AnGam_adult_ovaries_blood_TN	0.0192827	0.0154344	0.459286	0	0.143425	0.0739673	0.282062	0.00417331	0.00236952
AnGam_Ovary_TN	12542540	0.93	24755	53476	840100	90	317084	70350	691518	2729	1807	AnGam_experiment_20181221					2001909	AnGam_Ovary_TN	0.0123657	0.0267125	0.419649	4.49571e-05	0.158391	0.0351415	0.345429	0.0013632	0.000902638
AnGam_Fcarc_TN_rerun	2638667	0.94	236191	101259	144435	2187	12313	92103	111619	32292	9282	AnGam_experiment_20190320 + AnGam_experiment_20181221					741681	AnGam_Fcarc_TN_rerrun	0.318454	0.136526	0.19474	0.00294871	0.0166015	0.124181	0.150495	0.0435389	0.0125148
AnGam_Mos55-JRcells_BetaE	23523387	0.94	6256	151347	355497	17489	47602	94878	210099	117368	27798	AnGam_sRNA_20190530					1028334	AnGam_Mos55-JRcells_BetaE	0.00608363	0.147177	0.345702	0.0170071	0.0462904	0.0922638	0.20431	0.114134	0.0270321
AnGam_Sua5bcells_BetaE	5159386	0.95	9359	140798	212517	17408	16945	145445	139896	73719	14727	AnGam_sRNA_20190530					770814	AnGam_Sua5bcells_BetaE	0.0121417	0.182661	0.275705	0.0225839	0.0219833	0.18869	0.181491	0.0956379	0.0191058
AnGam_Ovary_BetaE	45019162	0.94	4166	66622	782368	31	251817	102033	618425	18131	8491	AnGam_sRNA_20190530					1852084	AnGam_Ovary_BetaE	0.00224936	0.0359714	0.422426	1.67379e-05	0.135964	0.0550909	0.333908	0.00978951	0.00458457
AnGam_Testes_BetaE	32137282	0.94	1729	53380	665563	18	187980	96898	493807	11891	10916	AnGam_sRNA_20190530					1522182	AnGam_Testes_BetaE	0.00113587	0.0350681	0.437243	1.18251e-05	0.123494	0.0636573	0.324407	0.00781181	0.00717128
																						Average % of reads targeting Transposons:	0.0617344

## Sheet: TableS2_AnGam_Intergenic_piRCL
Table S2. Metatable of AnGam samples and cell lines, and additional tabs of top Genic and Intergenic piRNA clusters. Counts are reads per million
	Curated_range	Size	Start	Stop	Ovary_TN	Testis_TN	Fcarc_TN	Mcarc_TN	Sua5b	Mos55_cells	Mos55_JR		Average rpm
1	2L:282051-296325	14275	282051	296325	861.233	665.277	0	0	26.112	0	0		221.803
2	2L:1443521-1528526	85006	1443521	1528526	950.056	963.867	0	0	1120.71	95.358	47.707		453.957
3	2L:1700651-1925750	225100	1700651	1925750	2844.92	1061.45	27.521	39.285	81.528	295.059	210.115		651.411
4	2L:5079101-5602725	523625	5079101	5602725	15048.8	12812.4	71.124	72.663	332.497	528.8	565.936		4204.61
5	2L:5242701-5269800	27100	5242701	5269800	2099.94	1092.49	11.469	18.51	78.282	145.229	76.232		503.165
6	2L:13028401-13046825	18425	13028401	13046825	41.616	8675.74	0	0	0	0	0		1245.34
7	2L:27468076-27470025	1950	27468076	27470025	167.557	204.516	92.567	166.127	492.755	2457.2	1838.13		774.121
8	2L:40129526-40136575	7050	40129526	40136575	218.557	79.162	0	0	0	830.071	807.12		276.416
9	2R:1828401-1829475	1075	1828401	1829475	4223.35	1743.79	37673.2	18292.3	33620.2	32080.1	33996.1		23089.9
10	2R:5816076-5824000	7925	5816076	5824000	4437.69	3077.95	3295.32	3450.57	7651.75	24546	18541		9285.75
11	2R:57993976-58101075	107100	57993976	58101075	56471.4	10605.9	681.18	655.9	8581.34	21593.3	12866.6		15922.2
12	2R:34611876-34622850	10975	34611876	34622850	211.564	23688.8	1802.03	1518.95	5495.07	847.4	2818.77		5197.52
13	2R:54564501-54585775	21275	54564501	54585775	144.506	2785.31	0	0	0	0	0		418.545
14	2R:54594301-54597025	2725	54594301	54597025	0	271.464	0	0	0	0	0		38.7806
15	2R:58004551-58101225	96675	58004551	58101225	51601.3	9627.45	673.872	645.31	7944.43	19996	11970		14636.9
16	3L:1175301-1184425	9125	1175301	1184425	714.85	311.124	0	0	0	0	11.211		148.169
17	3L:20849534-20869320	19787	20849534	20869320	8177	7913.79	12783.3	12566.4	32417.7	100846	102450		39593.5
18	3L:21088951-21096150	7200	21088951	21096150	6645.2	4344.15	4511.61	5649.52	9422.46	18384.8	16386.9		9334.95
19	3L:25711951-25714650	2700	25711951	25714650	725.853	215.198	2073.82	1943.27	1649.05	1107.1	4592.24		1758.07
20	3L:20849351-20868725	19375	20849351	20868725	8177	7913.79	12783.3	12566.4	32392.1	100846	102450		39589.8
21	3L:21088151-21096900	8750	21088151	21096900	6754.47	4400.87	4517.7	5662.76	9435.81	18435.2	16415.2		9374.58
22	3L:25711926-25714650	2725	25711926	25714650	725.853	215.198	2073.82	1943.27	1649.05	1107.1	4592.24		1758.07
23	3R:9174826-9178000	3175	9174826	9178000	120.664	59.98	476.234	156.015	377.006	49.92	343.377		226.171
24	3R:34671451-34675525	4075	34671451	34675525	0	1150.85	0	0	0	0	0		164.408
25	3R:34679851-34687625	7775	34679851	34687625	0	1267.82	0	0	0	0	0		181.118
26	3R:52689001-52698800	9800	52689001	52698800	490.233	275.344	0	0	0	0	0		109.368
27	X:3306051-3327850	21800	3306051	3327850	18404.1	21904.4	164.082	165.969	509.494	554.818	373.107		6010.86
28	X:3337501-3345250	7750	3337501	3345250	3451	3675.55	0	0	0	0	0		1018.08
29	X:11628476-11651425	22950	11628476	11651425	19457	1691.96	3704.8	2961.16	10018.7	25976.5	21445.2		12179.3
30	X:12989726-12993850	4125	12989726	12993850	1432.72	665.698	0	0	0	0	0		299.774
31	X:14970851-14976000	5150	14970851	14976000	0	3750.09	0	0	3781.18	899.54	99.333		1218.59
32	X:21526676-21557200	30525	21526676	21557200	575.727	173.167	0	0	25.46	25.835	9.487		115.668
33	X:21721401-21766175	44775	21721401	21766175	665.314	346.529	0	0	6.388	3400.02	1676.96		870.744
34	X:22976601-23002825	26225	22976601	23002825	1236.45	580.956	5.37	0	18.705	0	0		263.069
35	X:23378601-23388350	9750	23378601	23388350	2159.62	423.615	0	0	0	8.41	0		370.235
36	X:24283451-24296925	13475	24283451	24296925	2408.94	522.64	0	0	0	0	0		418.798
37	X:24366926-24392000	25075	24366926	24392000	2850.61	247.193	0	0	20.503	0	0		445.472

## Sheet: TableS2_AnGam_Genic_piRCL
Table S2. Metatable of AnGam samples and cell lines, and additional tabs of top Genic and Intergenic piRNA clusters. Counts are reads per million
	Gene	Locus	Ovary_TN	Testis_TN	Fcarc_TN	Mcarc_TN	Sua5b	Mos55_cells	Mos55_JR		Average rpm
1	AGAP000202-RA	X:3335575-3335910	2.039	10.315	0	0.221	0	0.553	0.351		1.92557
2	AGAP000423-RA	X:7603584-7604228	2.135	379.586	4.112	3.934	1.536	3.4	0.333		56.4337
3	AGAP000424-RA	X:7602142-7602793	2.259	397.106	4.924	4.44	1.922	3.746	0.333		59.2471
4	AGAP000523-RA	X:9455261-9456119	8.341	2.791	53.591	17.523	4.348	1.198	1.402		12.742
5	AGAP000628-RA	X:11306049-11306770	0.371	22.087	0	0.055	0	0	0		3.21614
6	AGAP000654-RA	X:11692551-11695724	4.078	12.196	21.924	23.48	8.907	4.424	5.959		11.5669
7	AGAP000694-RA	X:12442168-12442991	0	0.121	0	8.723	0	31.15	1.402		5.91371
8	AGAP000867-RA	X:16156065-16158307	2.901	3.567	16.92	3.794	33.434	2.485	10.568		10.5241
9	AGAP000952-RA	X:18333053-18335370	3.8	10.922	26.796	15.942	4.91	2.212	8.295		10.411
10	AGAP001078-RA	X:23113199-23114095	64.726	64.366	0.582	0.18	0.028	0	0		18.5546
11	AGAP001079-RA	X:23125376-23126272	64.665	64.328	0.582	0.18	0.028	0	0		18.5404
12	AGAP001175-RA	2R:699268-722813	65.162	239.752	0.58	0.593	5.364	740.358	1067.8		302.802
13	AGAP001547-RA	2R:6094030-6094112	2.833	27.457	53.632	48.541	99.338	236.7	146.233		87.8191
14	AGAP001622-RA	2R:6972953-6975077	1.297	4.247	73.079	36.341	0	0	0.351		16.4736
15	AGAP001629-RA	2R:7023976-7025198	0.278	0.243	19.488	12.595	3.367	0.737	0.701		5.34414
16	AGAP001830-RA	2R:11295928-11296010	8.1	82.128	252.773	209.961	469.972	462.311	899.99		340.748
17	AGAP001835-RA	2R:11364125-11364217	0.88	1.596	12.18	11.431	1.543	1.359	0.847		4.26229
18	AGAP001839-RA	2R:11383438-11383522	0.989	9.102	32.784	19.553	7.245	4.144	3.505		11.046
19	AGAP001920-RA	2R:12100998-12101080	0.17	0.301	0.528	0.106	0.293	31.6	93.266		18.0377
20	AGAP002171-RA	2R:16835156-16837846	1.205	1.723	0	0.662	1.613	0.422	3.856		1.35443
21	AGAP002358-RC	2R:20597733-20600254	0	6.068	380.925	95.438	0	0.184	0		68.945
22	AGAP002395-RA	2R:20904478-20905570	3.522	2.973	12.18	10.867	2.455	1.521	4.381		5.41414
23	AGAP002413-RD	2R:21022301-21031282	11.77	35.193	48.719	51.3	25.395	8.474	5.959		26.6871
24	AGAP002437-RA	2R:21381899-21383673	2.502	10.072	26.796	28.132	5.962	1.475	2.454		11.0561
25	AGAP002552-RA	2R:22718441-22723375	83.658	611.34	1090.81	2087.65	445.074	118.018	237.992		667.792
26	AGAP002659-RA	2R:25205535-25208326	3.406	2.235	9.135	4.285	37.422	44.237	70.422		24.4489
27	AGAP002698-RA	2R:25722323-25722416	2.363	11.205	87.695	127.606	19.615	16.251	15.627		40.0517
28	AGAP002921-RA	2R:29615089-29616276	9.082	10.234	40.194	30.118	27.353	4.977	13.319		19.3253
29	AGAP002921-RB	2R:29615292-29616285	8.99	9.992	40.194	29.677	27.213	4.792	12.969		19.1181
30	AGAP002922-RA	2R:29619268-29622737	4.634	66.502	0	1.557	0.779	43.914	3.856		17.3203
31	AGAP003025-RC	2R:31232788-31234282	7.321	8.009	17.052	25.705	25.53	4.884	7.886		13.7696
32	AGAP003099-RA	2R:32428641-32430324	0.997	7.86	42.315	147.64	3.903	3.533	6.569		30.4024
33	AGAP003100-RA	2R:32429424-32429505	0.997	7.86	42.315	147.199	3.763	3.441	6.569		30.3063
34	AGAP003107-RA	2R:32444709-32444791	1.738	1.021	6.699	2.704	25.277	36.403	48.107		17.4213
35	AGAP003387-RA	2R:37217855-37219290	3231.17	5619.07	48786.4	60357.3	39425.7	19607.5	25103.3		28875.8
36	AGAP003450-RA	2R:37856472-37856554	1.282	9.86	21.163	48.962	4.617	3.813	8.438		14.0193
37	AGAP003556-RA	2R:39456120-39460017	20.342	29.105	56.636	30.256	25.885	5.99	32.246		28.6371
38	AGAP003592-RB	2R:40368995-40370614	6.812	10.744	29.841	9.819	22.163	1.659	9.814		12.9789
39	AGAP003768-RB	2R:43124477-43126201	11.492	8.94	26.796	10.481	17.971	4.884	12.326		13.27
40	AGAP003769-RA	2R:43128267-43134183	5.097	6.388	43.848	15.865	17.24	3.64	10.866		14.7063
41	AGAP003939-RD	2R:46558391-46565032	0.005	3.523	241.567	44.901	0.215	0	0		41.4587
42	AGAP004045-RA	2R:48604364-48604456	1.066	8.556	27.405	16.061	12.835	10.691	19.395		13.7156
43	AGAP004047-RA	2R:48627040-48627123	1.344	1.252	4.507	1.792	18.767	4.481	12.326		6.35271
44	AGAP004161-RA	2R:50962808-50968817	0	12.621	173.089	219.84	0.281	0	0.234		58.0093
45	AGAP004307-RB	2R:54319762-54320891	1.39	1.292	4.872	3.111	1.543	0.092	1.753		2.00757
46	AGAP004364-RA	2R:55074541-55074623	1.097	9.314	18.93	43.373	2.724	1.601	2.012		11.293
47	AGAP004616-RA	2R:58514960-58515710	0.371	1.82	10.962	4.965	1.122	0.276	0		2.788
48	AGAP004746-RA	2L:3030685-3033272	0.556	1.82	1.218	0.441	48.815	0	0		7.55
49	AGAP004804-RA	2L:3749867-3750910	0.278	0.243	103.857	2.282	0.281	0.092	0		15.2904
50	AGAP004823-RA	2L:3915255-3917704	0.278	0.758	0	0.993	0.421	62.202	1.586		9.46257
51	AGAP004827-RA	2L:4120672-4142010	897.887	489.394	14.616	1.787	0.187	0.725	0.351		200.707
52	AGAP004894-RA	2L:5443485-5444381	86.696	82.015	0.582	0.18	0	0	0		24.2104
53	AGAP004919-RA	2L:6015223-6016508	2.317	4.247	13.398	6.73	5.05	2.488	5.258		5.64114
54	AGAP005061-RB	2L:9150874-9153651	7.089	7.542	23.548	11.321	9.311	3.156	9.843		10.2586
55	AGAP005108-RA	2L:10198413-10202723	10.009	25.545	26.796	37.234	31.912	11.75	10.515		21.9659
56	AGAP005247-RA	2L:13062860-13068109	0.243	338.722	2.436	0.496	0.289	0.215	0		48.9144
57	AGAP005427-RA	2L:15420852-15422467	11.862	13.349	34.713	33.483	10.661	2.488	7.01		16.2237
58	AGAP005439-RA	2L:15473194-15473275	0.742	7.536	26.237	110.197	4.324	1.091	3.473		21.9429
59	AGAP005549-RA	2L:16957537-16966311	19.991	51.867	167.676	74.487	94.789	27.189	95.886		75.9836
60	AGAP005639-RA	2L:18093297-18104529	399.987	171.517	2.346	1.543	1.385	748.959	528.773		264.93
61	AGAP005769-RA	2L:20390816-20391733	0.309	1.092	2.436	0.993	12.502	20.459	12.268		7.15129
62	AGAP005900-RA	2L:23437034-23437116	0.649	0.394	2.436	16.162	1.824	10.967	14.371		6.68614
63	AGAP005930-RA	2L:23829153-23830558	0	0.121	0	0	0	21.212	0		3.04757
64	AGAP005978-RA	2L:24431260-24443456	5.558	13.949	24.028	12.399	17.352	5.662	12.642		13.0843
65	AGAP005991-RA	2L:24568193-24570225	3.985	7.524	29.232	14.489	14.168	4.931	5.258		11.3696
66	AGAP006037-RA	2L:25521108-25523721	2.41	10.71	34.104	21.397	10.801	5.535	8.763		13.3886
67	AGAP006442-RA	2L:32055088-32055862	0.436	0.789	5607.42	382.427	3.682	0.23	0		856.426
68	AGAP007261-RA	2L:44764609-44764692	0.896	3.775	11.002	14.17	22.748	7.834	18.401		11.2609
69	AGAP007267-RA	2L:44792376-44792458	1.699	11.316	27.861	51.548	2.513	9.306	27.588		18.833
70	AGAP007352-RA	2L:46003641-46003724	0.834	6.675	23.142	12.687	13.045	2.796	13.319		10.3569
71	AGAP007493-RA	2L:46904674-46905989	52.26	21.983	0	0.055	0.299	0	0.055		10.6646
72	AGAP007602-RA	2L:48154653-48155737	45.692	24.94	0	0.022	0.573	0	0		10.1753
73	AGAP007686-RA	2L:49055232-49060564	1.946	9.18	19.488	21.072	5.05	2.673	3.505		8.98771
74	AGAP008020-RA	3R:4324177-4326573	0	0.243	0	0.938	3.858	58.875	0.701		9.23071
75	AGAP008069-RA	3R:5039297-5039381	1.359	9.951	31.566	21.263	8.087	4.067	3.505		11.3997
76	AGAP008235-RA	3R:7548490-7550554	1.894	37.6	0	0.331	0	0	0		5.68929
77	AGAP008416-RA	3R:10520944-10523127	17.423	48.056	0	0.496	0	0.092	0		9.43814
78	AGAP008607-RA	3R:13539365-13539447	0.687	0.335	6.648	2.438	21.199	7.846	34.834		10.5696
79	AGAP008760-RA	3R:17140287-17142331	5.437	3.285	7.308	1.434	180.297	36.326	46.967		40.1506
80	AGAP008786-RA	3R:17865417-17865500	1.475	1.93	17.915	7.737	21.678	7.852	18.168		10.965
81	AGAP008789-RA	3R:17867091-17867174	1.753	2.051	19.133	7.847	22.59	8.214	19.57		11.594
82	AGAP008906-RA	3R:20608117-20622585	182.38	572.21	2.842	3.56	1.753	1.167	0.862		109.253
83	AGAP009031-RA	3R:24355400-24357854	5.375	107.278	32.886	8.67	5.611	3.963	3.155		23.8483
84	AGAP009075-RA	3R:25435142-25440224	4.17	14.593	15.834	8.936	10.478	3.302	4.907		8.88857
85	AGAP009184-RA	3R:28493650-28494605	0	0.425	16.24	11.422	0.187	0	0		4.03914
86	AGAP009440-RA	3R:33493917-33495988	7.198	23.118	123.017	43.963	50.989	26.376	75.358		50.0027
87	AGAP009817-RA	3R:43776901-43778141	3.954	12.378	30.45	32.88	22.724	11.474	10.34		17.7429
88	AGAP009818-RA	3R:43778140-43779429	2.41	2.427	1.218	5.406	9.445	0.829	2.103		3.40543
89	AGAP009998-RA	3R:47431927-47434759	16.166	7.281	17.146	13.496	4.834	2.373	8.062		9.90829
90	AGAP010173-RA	3R:49908007-49910401	2.966	9.349	45.066	22.322	4.306	2.995	2.629		12.8047
91	AGAP010273-RA	3R:51921330-51925203	0.51	1.265	0	0.423	0.637	2.304	1.823		0.994571
92	AGAP010309-RA	3R:53112374-53112986	22.346	6.886	0	0.037	0.07	195.508	120.486		49.3333
93	AGAP010552-RA	3L:6294881-6297344	57.549	18.705	4.872	4.624	3.628	1.413	1.052		13.1204
94	AGAP010591-RA	3L:6563220-6564791	5.746	6.553	17.052	9.58	7.154	2.12	5.608		7.68757
95	AGAP010664-RA	3L:8165472-8165554	0.127	0.368	3.29	5.448	0.963	12.361	11.993		4.93571
96	AGAP010958-RA	3L:13830840-13849503	73.719	9.86	700.391	16.855	25.705	110.797	82.544		145.696
97	AGAP011154-RA	3L:18088528-18088610	7.63	74.44	245.546	209.189	463.275	474.226	891.219		337.932
98	AGAP011244-RA	3L:19980162-19981901	0.927	1.335	2.436	0.993	1.122	1.29	1.052		1.30786
99	AGAP011550-RA	3L:27208084-27208167	3.321	10.335	21.416	27.507	9.503	1.582	29.15		14.6877
100	AGAP011585-RA	3L:28428942-28429025	1.189	7.969	18.371	24.308	8.241	0.891	1.811		8.96857
101	AGAP011597-RA	3L:28681279-28681362	1.097	8.212	18.371	22.212	8.241	0.845	1.811		8.68414
102	AGAP011664-RA	3L:31081197-31084953	6.178	15.533	40.194	34.88	23.517	6.712	19.278		20.8989
103	AGAP011706-RA	3L:31717150-31718937	27.247	37.964	146.158	66.607	337.356	57.6	88.327		108.751
104	AGAP011872-RA	3L:34565738-34575165	4.95	12.385	4.872	8.918	8.276	1.889	3.505		6.39929
105	AGAP011923-RA	3L:35162789-35163341	86.679	71.239	821.654	265.332	507.341	1140.42	448.186		477.265
106	AGAP012100-RA	3L:37645764-37647109	6.858	12.621	20.706	14.397	12.905	2.028	2.103		10.2311
107	AGAP012140-RA	3L:38007362-38011711	6.302	15.21	9.744	17.063	18.586	1.198	5.258		10.4801
108	AGAP012182-RA	3L:38456176-38456813	35.189	9.78	0	0	0	0.01	0		6.42557
109	AGAP012445-RA	UNKN:1233016-1242633	370.609	253.918	3.654	1.163	0.042	0.046	0.351		89.969
110	AGAP012447-RA	UNKN:1553911-1557267	699.822	395.738	2.436	0.441	0	0.092	0.351		156.983
111	AGAP012454-RA	UNKN:3314908-3315679	71.344	57.533	0.152	0.074	0	0.032	0		18.4479
112	AGAP012455-RA	UNKN:3392127-3393200	55.9	37.092	0	0.081	0	0	0		13.2961
113	AGAP012483-RA	UNKN:6217283-6219148	29.71	38.659	0.152	0.066	0.081	0.084	0.085		9.83386
114	AGAP012486-RA	UNKN:6962245-6963895	51.876	31.509	0	0	0.04	0.015	0.117		11.9367
115	AGAP012494-RA	UNKN:7853453-7854257	72.729	20.39	0	0.138	0	0.046	0		13.329
116	AGAP012520-RA	UNKN:10829314-10829951	189.243	98.54	0.609	0	0	0.092	0		41.212
117	AGAP012637-RA	UNKN:21921416-21922782	0.541	24.558	7.917	18.929	1.239	0.295	0.351		7.69
118	AGAP012663-RA	UNKN:22759624-22760369	0.093	35.196	0	0.11	0	0.092	0		5.07014
119	AGAP012701-RA	UNKN:24203565-24204814	103.464	77.293	0	0.037	0	0	0.117		25.8444
120	AGAP012708-RA	UNKN:24524241-24526234	5.098	6.636	8.932	11.157	6.54	2.051	5.228		6.52029
121	AGAP012734-RA	UNKN:25954797-25955445	20.501	16.019	0	0.11	0.035	0	0.117		5.25457
122	AGAP012762-RA	UNKN:27732527-27734020	29.815	38.703	0.152	0.066	0.081	0.102	0.092		9.85871
123	AGAP012776-RA	UNKN:28490373-28490701	23.921	30.879	0.135	0.014	0	0	0		7.84986
124	AGAP012888-RA	UNKN:36778351-36779233	146.302	46.742	0	0.055	0.14	0	0		27.6056
125	AGAP012956-RB	X:1767379-1779414	75.797	17.033	350.594	259.708	18.051	114.206	184.397		145.684
126	AGAP013000-RA	X:7601419-7602065	2.24	367.309	2.996	3.943	1.536	3.366	0.333		54.5319
127	AGAP013040-RA	X:12801695-12802809	28.452	109.795	0.406	0.27	0.406	2.779	4.99		21.014
128	AGAP013064-RA	X:20251401-20251736	54.824	44.357	0.203	0.103	0	0	0		14.2124
129	AGAP013129-RA	X:7602863-7603507	2.135	379.586	4.112	3.934	1.536	3.4	0.333		56.4337
130	AGAP013330-RA	2R:15342465-15343054	516.146	556.194	140.763	235.647	630.467	1129.61	1737.11		706.563
131	AGAP013360-RA	X:11318845-11319476	0.185	21.116	0	0.055	0	0	0		3.05086
132	AGAP028112-RA	3R:9853619-9855862	241.279	4.494	0	0.055	0	0.092	0		35.1314
133	AGAP028366-RA	Mt:3026-3721	0.185	5.946	46.283	196.617	43.337	12.995	8.938		44.9001
134	AGAP028371-RA	Mt:4697-5494	0	5.522	30.45	137.223	45.612	16.266	8.412		34.7836
135	AGAP028386-RA	Mt:9883-10418	0	0.364	13.398	11.639	3.367	4.984	2.804		5.22229
136	AGAP028431-RA	2L:477915-484652	178.823	76.905	0.507	0.232	0.461	0.149	0.333		36.7729
137	AGAP028511-RA	3L:17004367-17009260	85.629	13.981	0.58	0.591	0.717	0.329	0		14.5467
138	AGAP028564-RA	3R:23689873-23692475	103.992	55.805	2.064	0.59	381.026	0.835	1.662		77.9963
139	AGAP028576-RA	UNKN:1581836-1585780	640.3	264.462	3.654	0.552	0.175	0.502	5.443		130.727
140	AGAP028577-RA	UNKN:1769866-1771594	131.993	89.46	0	0.053	0.038	0.034	0		31.654
141	AGAP028579-RA	UNKN:5058714-5059605	20.176	66.68	0.244	0	1.461	0.523	0.342		12.7751
142	AGAP029066-RA	2R:39210368-39213410	39.202	30.703	174.172	60.696	111.262	16.133	71.503		71.953
