# Supplementary material for: A mosquito small RNA genomics resource reveals dynamic evolution and host responses to viruses and transposons
Source: HighWire-hosted journal article supplement (doi:10.1101/gr.265157.120), 2021-01-08
Supplement: SupplementalTableS3.xlsx [file SupplementalTableS3.xlsx]

## Sheet: TableS3_Dmel_MetaTable
Table S3. Metatable of Dmel samples and cell lines re-analyzed for this study for the purpose of investigating piRNA biogenesis patterns.
Sample	Library Size (all replicates)	Percent Genome Mapped	miRNA counts	siRNA counts	piRNA counts	Virus counts	TE counts	Genecentric count	Intergenic counts	StructureRNA_Derived_siRNA	StructureRNA_Derived_piRNA	Source		Source	Sum		Sample	miRNA counts	siRNA counts	piRNA counts	Virus counts	TE counts	Genecentric count	Intergenic counts	StructureRNA_Derived_siRNA	StructureRNA_Derived_piRNA
Dmel_Female_body	2485579	0.83	114046	560174	184392	1361	65268	117149	139467	144	0	Dmel_Robine_from_Lai_lab		Dmel_Robine_from_Lai_lab	1182001		Dmel_Female_body	0.0964855	0.47392	0.156	0.00115144	0.0552182	0.0991107	0.117992	0.000121827	0
Dmel_Male_body	5124565	0.9	188191	533538	112927	804	11003	109438	101787	122	0	Dmel_Robine_from_Lai_lab		Dmel_Robine_from_Lai_lab	1057810		Dmel_Male_body	0.177906	0.50438	0.106755	0.000760061	0.0104017	0.103457	0.0962243	0.000115333	0
Dmel_ImaginalDiscBrain	2575354	0.9	70958	546064	272081	42	52054	87894	88032	259	0	Dmel_Robine_from_Lai_lab		Dmel_Robine_from_Lai_lab	1117384		Dmel_ImaginalDiscBrain	0.0635037	0.488699	0.243498	3.75878e-05	0.0465856	0.0786605	0.078784	0.000231791	0
Dmel_12-24hr_embryo	548443	0.93	187037	471596	220731	101	47785	77413	71066	180	0	Dmel_Robine_from_Lai_lab		Dmel_Robine_from_Lai_lab	1075909		Dmel_12-24hr_embryo	0.173841	0.438323	0.205158	9.38741e-05	0.0444136	0.0719513	0.0660521	0.0001673	0
Dmel_3rdInstar_larvae	6123432	0.73	19530	442700	122403	48	975	12030	5489	336	0	Dmel_Robine_from_Lai_lab		Dmel_Robine_from_Lai_lab	603511		Dmel_3rdInstar_larvae	0.0323606	0.733541	0.202818	7.95346e-05	0.00161555	0.0199334	0.00909511	0.000556742	0
Dmel_2-4day_pupae	5783927	0.89	75826	545509	129308	320	4155	35157	21459	181	0	Dmel_Robine_from_Lai_lab		Dmel_Robine_from_Lai_lab	811915		Dmel_2-4day_pupae	0.0933915	0.671879	0.159263	0.00039413	0.00511753	0.0433013	0.0264301	0.00022293	0
Dmel_Ovary_Ago2_414	32331674	0.88	308477	366790	370760	26	237123	107910	217811	69	0	Dmel_Robine_from_Lai_lab		Dmel_Robine_from_Lai_lab	1608966		Dmel_Ovary_Ago2_414	0.191724	0.227966	0.230434	1.61594e-05	0.147376	0.0670679	0.135373	4.28847e-05	0
Dmel_Ovary_r2ds_1	30960926	0.9	377104	358836	286707	1515	298276	103602	228326	60	0	Dmel_Robine_from_Lai_lab		Dmel_Robine_from_Lai_lab	1654426		Dmel_Ovary_r2ds_1	0.227936	0.216895	0.173297	0.000915725	0.18029	0.0626211	0.138009	3.62664e-05	0
Dmel_OvaryBeta_RAL313_sRNA	28311913	0.96	959	210201	526046	21	222005	173385	432508	48	0	Dmel_Chen_lab_SRP019948		Dmel_Song_from_Chen_GBE_2014_SRP019948	1565173		Dmel_OvaryBeta_RAL313_sRNA	0.000612712	0.134299	0.336094	1.3417e-05	0.141841	0.110777	0.276332	3.06675e-05	0
Dmel_OvaryBeta_RAL358_sRNA	37353081	0.96	1235	192863	569266	1552	305291	205071	540978	51	0	Dmel_Chen_lab_SRP019948		Dmel_Song_from_Chen_GBE_2014_SRP019948	1816307		Dmel_OvaryBeta_RAL358_sRNA	0.000679951	0.106184	0.313419	0.000854481	0.168083	0.112905	0.297845	2.8079e-05	0
Dmel_OvaryBeta_RAL362_sRNA	43387302	0.95	1820	147609	702020	6	314126	172897	464702	35	0	Dmel_Chen_lab_SRP019948		Dmel_Song_from_Chen_GBE_2014_SRP019948	1803215		Dmel_OvaryBeta_RAL362_sRNA	0.00100931	0.0818588	0.389316	3.32739e-06	0.174203	0.0958826	0.257707	1.94098e-05	0
Dmel_OvaryBeta_RAL375_sRNA	43614387	0.95	1407	100143	772954	193	298543	149617	396530	24	0	Dmel_Chen_lab_SRP019948		Dmel_Song_from_Chen_GBE_2014_SRP019948	1719411		Dmel_OvaryBeta_RAL375_sRNA	0.000818303	0.0582426	0.449546	0.000112248	0.173631	0.0870164	0.23062	1.39583e-05	0
Dmel_OvaryBeta_RAL379_sRNA	27887880	0.95	1743	135648	703363	35	297641	178804	452889	32	0	Dmel_Chen_lab_SRP019948		Dmel_Song_from_Chen_GBE_2014_SRP019948	1770155		Dmel_OvaryBeta_RAL379_sRNA	0.00098466	0.0766306	0.397345	1.97723e-05	0.168144	0.10101	0.255847	1.80775e-05	0
Dmel_OvaryBeta_RAL380_sRNA	33660124	0.95	1181	130896	732414	10	315366	177176	452566	29	0	Dmel_Chen_lab_SRP019948		Dmel_Song_from_Chen_GBE_2014_SRP019948	1809638		Dmel_OvaryBeta_RAL380_sRNA	0.000652617	0.0723327	0.40473	5.52597e-06	0.17427	0.0979069	0.250086	1.60253e-05	0
Dmel_OvaryBeta_RAL391_sRNA	18963421	0.96	950	148825	619387	5	245441	166927	412702	36	0	Dmel_Chen_lab_SRP019948		Dmel_Song_from_Chen_GBE_2014_SRP019948	1594273		Dmel_OvaryBeta_RAL391_sRNA	0.000595883	0.0933498	0.388507	3.13623e-06	0.153952	0.104704	0.258865	2.25808e-05	0
Dmel_OvaryBeta_RAL399_sRNA	36262370	0.96	1250	140345	649244	6	313942	192105	509587	32	0	Dmel_Chen_lab_SRP019948		Dmel_Song_from_Chen_GBE_2014_SRP019948	1806511		Dmel_OvaryBeta_RAL399_sRNA	0.000691942	0.0776884	0.359391	3.32132e-06	0.173784	0.10634	0.282084	1.77137e-05	0
Dmel_OvaryBeta_RAL427_sRNA	37719576	0.96	1374	142910	671637	1250	279368	159691	417359	44	0	Dmel_Chen_lab_SRP019948		Dmel_Song_from_Chen_GBE_2014_SRP019948	1673633		Dmel_OvaryBeta_RAL427_sRNA	0.000820969	0.0853891	0.401305	0.000746878	0.166923	0.0954158	0.249373	2.62901e-05	0
Dmel_OvaryBeta_RAL437_sRNA	33761529	0.95	1298	104750	805001	14	361134	188713	477701	33	0	Dmel_Chen_lab_SRP019948		Dmel_Song_from_Chen_GBE_2014_SRP019948	1938644		Dmel_OvaryBeta_RAL437_sRNA	0.00066954	0.0540326	0.415239	7.22154e-06	0.186282	0.0973428	0.24641	1.70222e-05	0
Dmel_OvaryBeta_RAL555_sRNA	44913004	0.95	897	90577	855480	5	344327	159280	439232	22	0	Dmel_Chen_lab_SRP019948		Dmel_Song_from_Chen_GBE_2014_SRP019948	1889820		Dmel_OvaryBeta_RAL555_sRNA	0.000474648	0.0479289	0.452678	2.64575e-06	0.182201	0.0842832	0.23242	1.16413e-05	0
Dmel_OvaryBeta_RAL705_sRNA	43232581	0.96	1131	104504	851124	5	404098	217128	523984	23	0	Dmel_Chen_lab_SRP019948		Dmel_Song_from_Chen_GBE_2014_SRP019948	2101997		Dmel_OvaryBeta_RAL705_sRNA	0.00053806	0.0497165	0.404912	2.37869e-06	0.192245	0.103296	0.249279	1.0942e-05	0
Dmel_OvaryBeta_RAL707_sRNA	27380423	0.95	1658	136977	796682	9	373044	173361	492596	46	0	Dmel_Chen_lab_SRP019948		Dmel_Song_from_Chen_GBE_2014_SRP019948	1974373		Dmel_OvaryBeta_RAL707_sRNA	0.00083976	0.0693775	0.403511	4.55841e-06	0.188943	0.0878056	0.249495	2.32985e-05	0
Dmel_OvaryBeta_RAL712_sRNA	29356231	0.96	2291	149361	700999	9	311461	174939	468384	41	0	Dmel_Chen_lab_SRP019948		Dmel_Song_from_Chen_GBE_2014_SRP019948	1807485		Dmel_OvaryBeta_RAL712_sRNA	0.00126751	0.0826347	0.387831	4.97929e-06	0.172317	0.0967859	0.259136	2.26835e-05	0
Dmel_OvaryBeta_RAL714_sRNA	32796697	0.96	1569	145847	751699	2417	343586	185685	499953	40	0	Dmel_Chen_lab_SRP019948		Dmel_Song_from_Chen_GBE_2014_SRP019948	1930796		Dmel_OvaryBeta_RAL714_sRNA	0.000812618	0.0755372	0.389321	0.00125182	0.17795	0.0961702	0.258936	2.07168e-05	0
Dmel_OvaryBeta_RAL732_sRNA	34902815	0.97	1361	149569	721100	10	334704	183898	502922	44	0	Dmel_Chen_lab_SRP019948		Dmel_Song_from_Chen_GBE_2014_SRP019948	1893608		Dmel_OvaryBeta_RAL732_sRNA	0.000718734	0.0789863	0.380807	5.28092e-06	0.176755	0.0971151	0.265589	2.32361e-05	0
Dmel_sRNA_w1XHar_2-4day	2176453	0.89	5975	154051	695046	54	497153	261047	590388	24	0	Dmel_Theurkauf_lab_SRP007937		Dmel_Khurana_from_Theurkauf_lab_Cell_2012_SRP007937	2203738		Dmel_sRNA_w1XHar_2-4day	0.0027113	0.0699044	0.315394	2.45038e-05	0.225595	0.118456	0.267903	1.08906e-05	0
Dmel_sRNA_w1XHar_21day	1291176	0.88	2933	124121	644582	30	466584	205576	559057	28	0	Dmel_Theurkauf_lab_SRP007937		Dmel_Khurana_from_Theurkauf_lab_Cell_2012_SRP007937	2002911		Dmel_sRNA_w1XHar_21day	0.00146437	0.0619703	0.321823	1.49782e-05	0.232953	0.102639	0.279122	1.39797e-05	0
Dmel_sRNA_HarXw1_2-4day	1097729	0.86	2221	106635	555732	55	391930	161397	464444	19	0	Dmel_Theurkauf_lab_SRP007937		Dmel_Khurana_from_Theurkauf_lab_Cell_2012_SRP007937	1682433		Dmel_sRNA_HarXw1_2-4day	0.00132011	0.0633814	0.330314	3.26908e-05	0.232954	0.0959307	0.276055	1.12932e-05	0
Dmel_sRNA_HarXw1_21day	4718328	0.95	4396	174226	783612	4720	586385	224612	682252	36	0	Dmel_Theurkauf_lab_SRP007937		Dmel_Khurana_from_Theurkauf_lab_Cell_2012_SRP007937	2460239		Dmel_sRNA_HarXw1_21day	0.00178682	0.0708167	0.318511	0.00191851	0.238345	0.0912968	0.277311	1.46327e-05	0
Dmel_OSSLau2018_sRNA	66937806	0.92	98015	151409	713519	90863	326698	357684	474230	4	0	Dmel_OSSWRR1_Lau2018		OSSLau2018_WRR1Lau2018_dysgenesis	2212422		Dmel_OSSLau2018_sRNA	0.0443021	0.0684359	0.322506	0.0410695	0.147665	0.161671	0.214349	1.80797e-06	0
Dmel_OSSLau2009_sRNA	23898851	0.91	145451	257306	602696	90256	295607	338114	471290	18	0	Dmel_OSSWRR1_Lau2018		DME_WRR1_OSS_in_GSE83877_Hannon_Lab_2016_PMC4973292	2200738		Dmel_OSSLau2009_sRNA	0.0660919	0.116918	0.273861	0.0410117	0.134322	0.153637	0.214151	8.17907e-06	0
Dmel_WRR1Lau2018_sRNA	28208162	0.93	50138	102773	629628	31848	71090	71877	73599	17	0	Dmel_OSSWRR1_Lau2018		OSSLau2018_WRR1Lau2018_dysgenesis	1030970		Dmel_WRR1Lau2018_sRNA	0.0486319	0.0996857	0.610714	0.0308913	0.0689545	0.0697178	0.0713881	1.64893e-05	0
Dmel_OSSHann2016_sRNA	52309059	0.87	89569	737717	261799	264629	189104	178756	239006	18	0	Dmel_Hannon_Lab_GSE83877		DME_WRR1_OSS_in_GSE83877_Hannon_Lab_2016_PMC4973292	1960598		Dmel_OSSHann2016_sRNA	0.0456845	0.376271	0.13353	0.134974	0.0964522	0.0911742	0.121905	9.18087e-06	0
Dmel_OSCBrenn2015_sRNA	20853798	0.28	1970	65698	3278299	6986	315113	112296	166284	40	0	Dmel_Hannon_Lab_GSE83877		DME_WRR1_OSS_in_GSE83877_Hannon_Lab_2016_PMC4973292	3946686		Dmel_OSCBrenn2015_sRNA	0.000499153	0.0166464	0.830646	0.00177009	0.0798424	0.0284532	0.0421326	1.01351e-05	0
Dmel_OSCSiomi2015_sRNA	19662476	0.98	2395	66780	946550	14719	374961	513525	699371	0	0	Dmel_Hannon_Lab_GSE83877		DME_WRR1_OSS_in_GSE83877_Hannon_Lab_2016_PMC4973292	2618301		Dmel_OSCSiomi2015_sRNA	0.000914715	0.0255051	0.361513	0.00562158	0.143208	0.196129	0.267109	0	0
Dmel_WRR12016_sRNA	48647546	0.97	233389	387790	364974	47217	292227	341949	431144	17	0	Dmel_Hannon_Lab_GSE83877		DME_WRR1_OSS_in_GSE83877_Hannon_Lab_2016_PMC4973292	2098707		Dmel_WRR12016_sRNA	0.111206	0.184776	0.173904	0.0224981	0.139241	0.162933	0.205433	8.10023e-06	0
Dmel_1182-4H_cellline	46318656	0.82	292402	500985	181725	119	68574	44982	66154	3	0	Dmel_Lai_Lab_SRP021897		Dmel_Wen_from_Lai_Lab_Genome_Research_2014_SRP021897	1154944		Dmel_1182-4H_cellline	0.253174	0.433774	0.157345	0.000103035	0.0593743	0.0389473	0.057279	2.59753e-06	0
Dmel_CME-L1_cellline	43310472	0.86	500008	388674	122584	21484	13311	18406	16170	5	0	Dmel_Lai_Lab_SRP021897		Dmel_Wen_from_Lai_Lab_Genome_Research_2014_SRP021897	1080642		Dmel_CME-L1_cellline	0.462695	0.35967	0.113436	0.0198808	0.0123177	0.0170325	0.0149633	4.62688e-06	0
Dmel_CME-W1-Cl8_Plus_cellline	12266659	0.73	256190	806675	77294	74008	35095	38862	43701	2	0	Dmel_Lai_Lab_SRP021897		Dmel_Wen_from_Lai_Lab_Genome_Research_2014_SRP021897	1331827		Dmel_CME-W1-Cl8_Plus_cellline	0.19236	0.605691	0.0580361	0.0555688	0.026351	0.0291795	0.0328128	1.5017e-06	0
Dmel_CME-W2_cellline	22447289	0.79	365922	607570	168150	74647	24272	37926	37912	7	0	Dmel_Lai_Lab_SRP021897		Dmel_Wen_from_Lai_Lab_Genome_Research_2014_SRP021897	1316406		Dmel_CME-W2_cellline	0.27797	0.461537	0.127734	0.0567052	0.0184381	0.0288103	0.0287996	5.31751e-06	0
Dmel_CME-G2_cellline	42681730	0.87	211036	582277	190100	4213	158718	84273	142511	3	0	Dmel_Lai_Lab_SRP021897		Dmel_Wen_from_Lai_Lab_Genome_Research_2014_SRP021897	1373131		Dmel_CME-G2_cellline	0.15369	0.424051	0.138443	0.00306817	0.115588	0.0613729	0.103785	2.18479e-06	0
Dmel_CME-GM2_cellline	13956052	0.63	309616	892324	64433	82548	26034	31198	29394	12	0	Dmel_Lai_Lab_SRP021897		Dmel_Wen_from_Lai_Lab_Genome_Research_2014_SRP021897	1435559		Dmel_CME-GM2_cellline	0.215676	0.621586	0.0448836	0.0575023	0.0181351	0.0217323	0.0204756	8.35911e-06	0
Dmel_Kc167_cellline	10042518	0.87	385590	462224	69884	41446	39822	43436	52596	3	0	Dmel_Lai_Lab_SRP021897		Dmel_Wen_from_Lai_Lab_Genome_Research_2014_SRP021897	1095001		Dmel_Kc167_cellline	0.352137	0.422122	0.0638209	0.0378502	0.0363671	0.0396675	0.0480328	2.73972e-06	0
Dmel_mbn2_cellline	67038216	0.67	262154	846520	168514	86826	63149	63121	71962	5	0	Dmel_Lai_Lab_SRP021897		Dmel_Wen_from_Lai_Lab_Genome_Research_2014_SRP021897	1562251		Dmel_mbn2_cellline	0.167805	0.541859	0.107866	0.0555775	0.0404218	0.0404039	0.046063	3.20051e-06	0
Dmel_ML-DmBg1-c1_cellline	56340019	0.73	241407	852650	211986	53557	210343	74015	101452	1	0	Dmel_Lai_Lab_SRP021897		Dmel_Wen_from_Lai_Lab_Genome_Research_2014_SRP021897	1745411		Dmel_ML-DmBg1-c1_cellline	0.13831	0.48851	0.121453	0.0306845	0.120512	0.0424055	0.058125	5.72931e-07	0
Dmel_MLDmBG3-c2_cellline	54731826	0.78	412919	485810	285942	41953	13658	23896	18280	2	0	Dmel_Lai_Lab_SRP021897		Dmel_Wen_from_Lai_Lab_Genome_Research_2014_SRP021897	1282460		Dmel_MLDmBG3-c2_cellline	0.321974	0.378811	0.222964	0.0327129	0.0106498	0.0186329	0.0142539	1.5595e-06	0
Dmel_DmD16-c3_cellline	35646273	0.86	527423	413313	184367	70401	23087	30648	32193	20	0	Dmel_Lai_Lab_SRP021897		Dmel_Wen_from_Lai_Lab_Genome_Research_2014_SRP021897	1281452		Dmel_DmD16-c3_cellline	0.411582	0.322535	0.143874	0.0549385	0.0180163	0.0239166	0.0251223	1.56073e-05	0
Dmel_ML-DmD20-c5_cellline	16815064	0.58	258574	1009034	39742	51586	18377	44369	40078	0	0	Dmel_Lai_Lab_SRP021897		Dmel_Wen_from_Lai_Lab_Genome_Research_2014_SRP021897	1461760		Dmel_ML-DmD20-c5_cellline	0.176892	0.690287	0.0271878	0.0352903	0.0125718	0.0303531	0.0274176	0	0
Dmel_ML-DmD21_cellline	11634819	0.83	387220	385300	108200	242	8880	12329	11193	2	0	Dmel_Lai_Lab_SRP021897		Dmel_Wen_from_Lai_Lab_Genome_Research_2014_SRP021897	913366		Dmel_ML-DmD21_cellline	0.423948	0.421846	0.118463	0.000264954	0.00972228	0.0134984	0.0122547	2.1897e-06	0
Dmel_ML-DmD32_cellline	246407530	0.9	577637	198585	290089	662	18965	19241	18479	54	0	Dmel_Lai_Lab_SRP021897		Dmel_Wen_from_Lai_Lab_Genome_Research_2014_SRP021897	1123712		Dmel_ML-DmD32_cellline	0.514044	0.176722	0.258152	0.000589119	0.0168771	0.0171227	0.0164446	4.8055e-05	0
Dmel_ML-DmD8_cellline	45824734	0.89	436684	379639	188875	295	13944	13363	14563	2	0	Dmel_Lai_Lab_SRP021897		Dmel_Wen_from_Lai_Lab_Genome_Research_2014_SRP021897	1047365		Dmel_ML-DmD8_cellline	0.416936	0.362471	0.180334	0.000281659	0.0133134	0.0127587	0.0139044	1.90955e-06	0
Dmel_ML-DmD9_cellline	42939999	0.84	405916	498569	127341	3538	35247	32156	47919	3	0	Dmel_Lai_Lab_SRP021897		Dmel_Wen_from_Lai_Lab_Genome_Research_2014_SRP021897	1150689		Dmel_ML-DmD9_cellline	0.352759	0.433279	0.110665	0.00307468	0.0306312	0.027945	0.0416437	2.60713e-06	0
Dmel_S1_cellline	45483729	0.8	229971	619331	363995	52414	135278	79923	120705	9	0	Dmel_Lai_Lab_SRP021897		Dmel_Wen_from_Lai_Lab_Genome_Research_2014_SRP021897	1601626		Dmel_S1_cellline	0.143586	0.386689	0.227266	0.0327255	0.0844629	0.0499012	0.075364	5.61929e-06	0
Dmel_S2-DRSC_cellline	46130523	0.76	281088	706777	92238	126752	66025	49565	61252	1	0	Dmel_Lai_Lab_SRP021897		Dmel_Wen_from_Lai_Lab_Genome_Research_2014_SRP021897	1383698		Dmel_S2-DRSC_cellline	0.203143	0.510788	0.0666605	0.0916038	0.0477163	0.0358207	0.0442669	7.22701e-07	0
Dmel_S2-NP_cellline	11564188	0.7	233384	734899	53618	44763	32864	55109	56706	1	0	Dmel_Lai_Lab_SRP021897		Dmel_Wen_from_Lai_Lab_Genome_Research_2014_SRP021897	1211344		Dmel_S2-NP_cellline	0.192665	0.606681	0.0442632	0.0369532	0.0271302	0.0454941	0.0468125	8.25529e-07	0
Dmel_S2R_Plus_cellline	11302985	0.82	371756	578765	62999	32033	69079	70961	100711	2	0	Dmel_Lai_Lab_SRP021897		Dmel_Wen_from_Lai_Lab_Genome_Research_2014_SRP021897	1286306		Dmel_S2R_Plus_cellline	0.289011	0.449943	0.0489767	0.0249031	0.0537034	0.0551665	0.0782947	1.55484e-06	0
Dmel_S2R_Plus_AGO1IP	32474705	0.87	345591	526323	134425	9396	13538	20015	20371	0	0	Dmel_Lai_Lab_SRP021897		Dmel_Wen_from_Lai_Lab_Genome_Research_2014_SRP021897	1069659		Dmel_S2R_Plus_AGO1IP	0.323085	0.492047	0.125671	0.00878411	0.0126564	0.0187116	0.0190444	0	0
Dmel_S2R_Plus_AGO2IP	34394400	0.8	57520	1011449	49840	132580	235899	237323	324164	5	0	Dmel_Lai_Lab_SRP021897		Dmel_Wen_from_Lai_Lab_Genome_Research_2014_SRP021897	2048780		Dmel_S2R_Plus_AGO2IP	0.0280752	0.493684	0.0243267	0.0647117	0.115141	0.115836	0.158223	2.44048e-06	0
Dmel_S3_cellline	58856053	0.83	364945	551600	168138	72451	67662	45536	66917	1	0	Dmel_Lai_Lab_SRP021897		Dmel_Wen_from_Lai_Lab_Genome_Research_2014_SRP021897	1337250		Dmel_S3_cellline	0.272907	0.412488	0.125734	0.0541791	0.0505979	0.034052	0.0500408	7.47803e-07	0
Dmel_Sg4_cellline	49973741	0.83	218502	533895	292269	96001	48621	32915	47308	1	0	Dmel_Lai_Lab_SRP021897		Dmel_Wen_from_Lai_Lab_Genome_Research_2014_SRP021897	1269512		Dmel_Sg4_cellline	0.172115	0.420551	0.230222	0.0756204	0.038299	0.0259273	0.0372647	7.87704e-07	0
Dmel_fGSOSS_cellline	18694409	0.7	271132	517518	639537	51504	60684	78282	73158	12	0	Dmel_Lai_Lab_SRP021897		Dmel_Wen_from_Lai_Lab_Genome_Research_2014_SRP021897	1691827		Dmel_fGSOSS_cellline	0.16026	0.305893	0.378016	0.0304428	0.0358689	0.0462707	0.043242	7.09292e-06	0
Dmel_OSCLai_cellline	46576922	0.83	132478	395343	527033	45901	215178	210361	310241	2	0	Dmel_Lai_Lab_SRP021897		Dmel_Wen_from_Lai_Lab_Genome_Research_2014_SRP021897	1836537		Dmel_OSCLai_cellline	0.0721347	0.215265	0.286971	0.0249932	0.117165	0.114542	0.168927	1.08901e-06	0
Dmel_OSScells_BetaE	8586386	0.95	4515	165042	477110	79661	156654	315232	125466	46	8743	Dmel_sRNA_20190530			1332469		Dmel_OSScells_BetaE	0.00338845	0.123862	0.358065	0.0597845	0.117567	0.236577	0.0941605	3.45224e-05	0.0065615
Dmel_WRR1cells_BetaE	23301103	0.93	2000	117055	282167	14913	11813	22746	5481	24	5891	Dmel_sRNA_20190530			462090		Dmel_WRR1cells_BetaE	0.00432816	0.253316	0.610632	0.0322729	0.0255643	0.0492242	0.0118613	5.19379e-05	0.0127486
																					Average % of reads targeting Transposons:	0.183138
