# Supplementary material for: A mosquito small RNA genomics resource reveals dynamic evolution and host responses to viruses and transposons
Source: HighWire-hosted journal article supplement (doi:10.1101/gr.265157.120), 2021-01-08
Supplement: SupplementalTableS4.xlsx [file SupplementalTableS4.xlsx]

## Sheet: TableS4_CuQuin_MetaTable
Table S4. Metatable of CuQuin samples and cell lines, and additional tabs of top Genic and Intergenic piRNA clusters.
Sample	Library Size (all replicates)	Percent Genome Mapped	miRNA counts	siRNA counts	piRNA counts	Virus counts	TE counts	Genecentric count	Intergenic counts	StructureRNA_Derived_siRNA	StructureRNA_Derived_piRNA	Source					Sum	Sample	miRNA counts	siRNA counts	piRNA counts	Virus counts	TE counts	Genecentric count	Intergenic counts	StructureRNA_Derived_siRNA	StructureRNA_Derived_piRNA
CuQuin_Hsu_NL	20012271	0.83	304026	233786	370369	6374	121945	37023	298835	196	40	CuQuin_sRNA_20190320					1372594	CuQuin_Hsu_NL	0.221497	0.170324	0.269831	0.00464376	0.0888427	0.026973	0.217716	0.000142795	2.91419e-05
CuQuin_Fcarc_NL	44596911	0.93	70704	311269	509192	1501	745682	164265	161456	205371	188382	CuQuin_sRNA_20190530					2357822	CuQuin_Fcarc_NL	0.029987	0.132015	0.215959	0.000636604	0.316259	0.0696681	0.0684768	0.087102	0.0798966
CuQuin_Mcarc_NL	16104278	0.96	125073	270221	411062	322	225927	151516	168431	340466	200025	CuQuin_sRNA_20190530					1893043	CuQuin_Mcarc_NL	0.0660698	0.142744	0.217144	0.000170097	0.119346	0.0800383	0.0889737	0.179851	0.105663
CuQuin_Ovary_NL	19938203	0.89	40669	198597	480884	77	144631	134026	364576	68326	43455	CuQuin_sRNA_20190530					1475241	CuQuin_Ovary_NL	0.0275677	0.13462	0.32597	5.21949e-05	0.0980389	0.0908502	0.24713	0.0463151	0.0294562
CuQuin_Testes_NL	20319530	0.91	132060	146569	279247	388	238395	85419	164720	183886	161148	CuQuin_sRNA_20190530					1391832	CuQuin_Testes_NL	0.0948821	0.105307	0.200633	0.000278769	0.171281	0.0613716	0.118348	0.132118	0.115781
CuQuin_MG_7dpi1	2996606	0.96	132455	295985	179992	2480	115946	157773	465447	34569	28049	CuQuin_sRNAs_Ebels_lab_PRJNA533980					1412696	CuQuin_MG_7dpi1	0.0937604	0.209518	0.12741	0.00175551	0.0820743	0.111682	0.329474	0.0244702	0.0198549
CuQuin_MG_7dpi2	1855121	0.95	150224	265914	177290	1734	104483	156413	430118	36065	26742	CuQuin_sRNAs_Ebels_lab_PRJNA533980					1348983	CuQuin_MG_7dpi2	0.111361	0.197122	0.131425	0.00128541	0.0774532	0.115949	0.318846	0.026735	0.0198238
CuQuin_MG_7dpi3	21702760	0.88	197086	307168	245202	1418	111575	118770	376078	33230	31388	CuQuin_sRNAs_Ebels_lab_PRJNA533980					1421915	CuQuin_MG_7dpi3	0.138606	0.216024	0.172445	0.000997247	0.0784681	0.0835282	0.264487	0.0233699	0.0220745
CuQuin_SG_14dpi1	7604932	0.95	65771	188159	381022	27080	71049	170359	200925	175592	237032	CuQuin_sRNAs_Ebels_lab_PRJNA533980					1516989	CuQuin_SG_14dpi1	0.0433563	0.124035	0.25117	0.0178512	0.0468355	0.112301	0.13245	0.11575	0.156252
CuQuin_SG_14dpi2	7482183	0.95	135817	233474	344119	44523	66953	119444	145601	189346	236012	CuQuin_sRNAs_Ebels_lab_PRJNA533980					1515289	CuQuin_SG_14dpi2	0.0896311	0.154079	0.227098	0.0293825	0.044185	0.0788259	0.0960879	0.124957	0.155754
CuQuin_SG_14dpi3	8039862	0.97	88119	206853	305823	37448	69074	159579	215794	155583	183542	CuQuin_sRNAs_Ebels_lab_PRJNA533980					1421815	CuQuin_SG_14dpi3	0.0619764	0.145485	0.215093	0.0263382	0.0485816	0.112236	0.151774	0.109426	0.12909
CuQuin_Hsu_17dpi_WNV1	6493331	0.97	176348	150047	394829	13511	101493	83069	118946	126353	50444	CuQuin_sRNAs_Ebels_lab_PRJNA533980					1215040	CuQuin_Hsu_17dpi_WNV1	0.145138	0.123491	0.324951	0.0111198	0.0835306	0.0683673	0.0978947	0.103991	0.0415163
CuQuin_Hsu_17dpi_WNV2	7670893	0.96	173151	151055	436370	18971	99566	84044	128202	114779	50693	CuQuin_sRNAs_Ebels_lab_PRJNA533980					1256831	CuQuin_Hsu_17dpi_WNV2	0.137768	0.120187	0.347199	0.0150943	0.0792199	0.0668698	0.102004	0.0913241	0.040334
CuQuin_Hsu_17dpi_WNV3	7702626	0.97	148600	98792	588482	5909	58376	66295	113747	80366	72855	CuQuin_sRNAs_Ebels_lab_PRJNA533980					1233422	CuQuin_Hsu_17dpi_WNV3	0.120478	0.0800959	0.477113	0.00479074	0.0473285	0.0537488	0.0922207	0.0651569	0.0590674
CuQuin_Hsu_2dpi_mock1	6805186	0.97	341884	251336	255953	1779	130697	66958	138747	158545	24307	CuQuin_sRNAs_Ebels_lab_PRJNA533980					1370206	CuQuin_Hsu_2dpi_mock1	0.249513	0.183429	0.186799	0.00129834	0.0953849	0.0488671	0.10126	0.115709	0.0177397
CuQuin_Hsu_2dpi_mock2	8312430	0.97	315994	250955	282811	2022	141546	73937	147370	174365	26976	CuQuin_sRNAs_Ebels_lab_PRJNA533980					1415976	CuQuin_Hsu_2dpi_mock2	0.223163	0.177231	0.199729	0.00142799	0.0999636	0.0522163	0.104077	0.123141	0.0190512
CuQuin_Hsu_2dpi_mock3	7256936	0.97	327988	256181	274780	1871	146685	71965	152625	174790	25314	CuQuin_sRNAs_Ebels_lab_PRJNA533980					1432199	CuQuin_Hsu_2dpi_mock3	0.22901	0.178872	0.191859	0.00130638	0.102419	0.0502479	0.106567	0.122043	0.0176749
CuQuin_Hsu_2dpi_WNV1	8734423	0.96	291986	238787	284502	4542	144306	88290	176323	185676	28864	CuQuin_sRNAs_Ebels_lab_PRJNA533980					1443276	CuQuin_Hsu_2dpi_WNV1	0.202308	0.165448	0.197122	0.00314701	0.099985	0.0611733	0.122169	0.128649	0.0199989
CuQuin_Hsu_2dpi_WNV2	11077223	0.96	278611	244366	281686	4520	135255	94592	178475	173023	31520	CuQuin_sRNAs_Ebels_lab_PRJNA533980					1422048	CuQuin_Hsu_2dpi_WNV2	0.195922	0.171841	0.198085	0.00317851	0.0951128	0.0665181	0.125506	0.121672	0.0221652
CuQuin_Hsu_2dpi_WNV3	6085130	0.96	310744	234916	282973	4456	137765	89520	181849	190543	31189	CuQuin_sRNAs_Ebels_lab_PRJNA533980					1463955	CuQuin_Hsu_2dpi_WNV3	0.212263	0.160467	0.193294	0.00304381	0.0941047	0.0611494	0.124218	0.130156	0.0213046
CuQuin_Hsu_30dpi_WNV1	6877280	0.97	231469	210966	333425	24257	118866	108502	165067	154710	47420	CuQuin_sRNAs_Ebels_lab_PRJNA533980					1394682	CuQuin_Hsu_30dpi_WNV1	0.165965	0.151265	0.239069	0.0173925	0.085228	0.0777969	0.118355	0.110929	0.0340006
CuQuin_Hsu_30dpi_WNV2	3816340	0.97	310667	205456	233072	15951	92406	55281	168151	121158	71744	CuQuin_sRNAs_Ebels_lab_PRJNA533980					1273886	CuQuin_Hsu_30dpi_WNV2	0.243873	0.161283	0.182961	0.0125215	0.0725387	0.0433956	0.131998	0.095109	0.056319
CuQuin_Hsu_30dpi_WNV3	14478382	0.91	28568	19982	54898	1731	16898	235479	352737	16365	9200	CuQuin_sRNAs_Ebels_lab_PRJNA533980					735858	CuQuin_Hsu_30dpi_WNV3	0.0388227	0.0271547	0.0746041	0.00235236	0.0229637	0.320006	0.479355	0.0222393	0.0125024
CuQuin_Hsu_6dpi_mock1	4675505	0.96	316051	254946	307750	1389	140722	70735	160883	151416	29422	CuQuin_sRNAs_Ebels_lab_PRJNA533980					1433314	CuQuin_Hsu_6dpi_mock1	0.220504	0.177872	0.214712	0.000969083	0.0981795	0.0493507	0.112245	0.10564	0.0205273
CuQuin_Hsu_6dpi_mock2	7477791	0.96	307136	251250	340612	1264	135339	75820	169407	139879	31320	CuQuin_sRNAs_Ebels_lab_PRJNA533980					1452027	CuQuin_Hsu_6dpi_mock2	0.211522	0.173034	0.234577	0.000870507	0.0932069	0.0522167	0.116669	0.0963336	0.0215698
CuQuin_Hsu_6dpi_mock3	7102771	0.96	306114	262309	294825	1248	137313	71025	156714	139513	26630	CuQuin_sRNAs_Ebels_lab_PRJNA533980					1395691	CuQuin_Hsu_6dpi_mock3	0.219328	0.187942	0.211239	0.000894181	0.0983835	0.0508888	0.112284	0.0999598	0.0190802
CuQuin_Hsu_6dpi_WNV1	6857339	0.97	282966	249702	272604	47631	99505	77074	144284	98940	26181	CuQuin_sRNAs_Ebels_lab_PRJNA533980					1298887	CuQuin_Hsu_6dpi_WNV1	0.217853	0.192243	0.209875	0.0366706	0.0766079	0.0593385	0.111083	0.0761729	0.0201565
CuQuin_Hsu_6dpi_WNV2	6007141	0.96	266743	255389	270722	56408	107178	81106	157474	106625	26767	CuQuin_sRNAs_Ebels_lab_PRJNA533980					1328412	CuQuin_Hsu_6dpi_WNV2	0.200798	0.192251	0.203794	0.0424627	0.0806813	0.0610549	0.118543	0.080265	0.0201496
CuQuin_Hsu_6dpi_WNV3	6424179	0.96	272756	258492	283992	58127	108144	93047	163433	110788	28550	CuQuin_sRNAs_Ebels_lab_PRJNA533980					1377329	CuQuin_Hsu_6dpi_WNV3	0.198033	0.187676	0.20619	0.0422027	0.0785172	0.0675561	0.118659	0.0804368	0.0207285
																						Average % of reads targeting transposons:	0.0922318

## Sheet: TableS4_CuQuin_Intergenic_piRCL
Table S4. Metatable of CuQuin samples and cell lines, and additional tabs of top Genic and Intergenic piRNA clusters. Counts are reads per million.
	Curated_range	Size	Start	Stop	Ovary_NL	Testes_NL	Fcarc_NL	Mcarc_NL	Hsu	Hsu_6dpi_mock1		Average rpm
1	supercont3.384:64651-69650	4999	64651	69650	13138.3	33150.5	14848.3	13420.7	123783	14993.5		35555.8
2	supercont3.1464:1-65637	65637	1	65637	8356.7	29346.6	59312	74446.7	8179.78	18687.2		33054.8
3	supercont3.1007:86226-112200	9174	862226	112200	19009.6	10676.5	5597.87	4247.03	49818.2	45229.9		22429.9
4	supercont3.176:68126-72375	4249	68126	72375	15602.1	8882.77	5526.65	9535.3	29661.5	17333		14423.5
5	supercont3.1544:8451-17350	8899	8451	17350	19767.8	6765.54	5079.68	16126.7	18296.8	10625.7		12777.1
6	supercont3.816:1776-13050	11274	1776	13050	883.599	3019.68	34955.9	23647.2	37.898	209.367		10458.9
7	supercont3.167:160651-165950	5299	160651	165950	70.138	144.174	227.366	158.41	15517.9	4810.57		3488.1
8	supercont3.124:597201-600800	3599	597201	600800	10156.1	1422.48	23.36	17.269	1805.93	3984.71		2901.64
9	supercont3.1235:81401-93125	11724	81401	93125	5986.48	557.225	8.363	0	55.446	68.152		1112.61
10	supercont3.401:367726-374300	6574	367726	374300	203.456	672.45	2157.3	1614.25	29.711	45.269		787.072
11	supercont3.1381:976-2825	1849	976	2825	40.236	183.07	2845.26	1397.31	0	0		744.313
12	supercont3.254:274751-277000	2249	274751	277000	3671.08	79.215	0	0	100.527	104.459		659.213
13	supercont3.1614:7501-14950	7449	7501	14950	3260.04	141.447	61.475	49.512	0	0		585.412
14	supercont3.1937:2176-9175	6999	2176	9175	2915.3	320.165	0	0	0	0		539.244
15	supercont3.507:356176-357600	1424	356176	357600	31.113	179.898	1649.76	1035.24	0	36.189		488.699
16	supercont3.764:4601-14700	10099	4601	14700	2448.47	275.044	0	0	0	0		453.919
17	supercont3.804:60951-62500	1549	60951	62500	1599.06	151.872	5.65	0	317.526	582.55		442.776
18	supercont3.218:495176-497175	1999	495176	497175	1084.07	408.734	0	0	0	0		248.8
19	supercont3.588:190501-193575	3074	190501	193575	1043.62	414.367	0	0	0	0		242.997
20	supercont3.684:154676-157200	2524	154676	157200	1012.91	236.896	0	0	0	0		208.301
21	supercont3.1064:62026-65800	3774	62026	65800	1116.47	103.463	0	0	0	0		203.321
22	supercont3.1544:28751-30450	1699	28751	30450	704.781	246.637	0	0	0	0		158.57
23	supercont3.114:272026-292375	20349	272026	292375	533.91	29.566	0	0	0	0		93.9127

## Sheet: TableS4_CuQuin_Genic_piRCL
Table S4. Metatable of CuQuin samples and cell lines, and additional tabs of top Genic and Intergenic piRNA clusters. Counts are reads per million.
	Gene	Locus	Ovary_NL	Testes_NL	Fcarc_NL	Mcarc_NL	Hsu	Hsu_6dpi_mock1		Average rpm
1	CPIJ000118-RA	supercont3.1:2506543-2524953	20.536	11.161	302.758	179.268	2.913	1.997		86.4388
2	CPIJ000162-RA	supercont3.3:620699-622122	11.831	8.993	106.579	78.783	6.502	1.039		35.6212
3	CPIJ000205-RA	supercont3.3:1871470-1872570	8.19	7.699	105.088	74.385	2.643	2.469		33.4123
4	CPIJ000232-RA	supercont3.3:2572338-2594097	12.576	21.25	750.342	882.361	1.84	1.118		278.248
5	CPIJ000279-RA	supercont3.2:1360262-1362574	24.859	22.881	242.711	137.983	11.518	48.767		81.4532
6	CPIJ000355-RA	supercont3.4:182733-185742	1.853	1.398	1.383	1.611	894.081	0		150.054
7	CPIJ000356-RA	supercont3.4:189585-194076	1.738	13.957	177.796	23.942	0.175	1.047		36.4425
8	CPIJ000369-RA	supercont3.4:839989-841898	7.131	100.642	47.164	10.454	23.103	85.419		45.6522
9	CPIJ000389-RA	supercont3.4:1168622-1173827	107.816	10.857	3.667	0.636	1.387	3.378		21.2902
10	CPIJ000470-RA	supercont3.5:760567-761247	2.866	2.779	92.364	71.264	0.276	0.52		28.3448
11	CPIJ000484-RA	supercont3.5:1135781-1136590	0.575	1.554	47.079	34.205	0.133	0.52		14.011
12	CPIJ000603-RA	supercont3.7:1176437-1177219	95.172	20.995	0.166	0	0	0		19.3888
13	CPIJ000607-RA	supercont3.7:1191076-1191835	95.672	21.289	0.166	0	0	0		19.5212
14	CPIJ000637-RA	supercont3.7:1547987-1548633	18.864	5.541	0.463	0.079	0.033	0.52		4.25
15	CPIJ000689-RA	supercont3.6:586882-588299	25.207	14.218	17.047	10.654	1.294	0.52		11.49
16	CPIJ000701-RA	supercont3.6:828701-830447	299.398	116.483	0.681	0.081	0.06	0		69.4505
17	CPIJ000728-RA	supercont3.6:1764386-1764783	3.235	3.107	172.276	126.417	93.151	78.217		79.4005
18	CPIJ000753-RA	supercont3.10:68438-71585	9.09	7.411	34.476	30.103	6.914	59.633		24.6045
19	CPIJ000766-RA	supercont3.10:599040-616971	1.332	399.659	23.795	25.933	0.662	0.576		75.3262
20	CPIJ000848-RA	supercont3.9:239405-246240	56.565	23.971	675.428	532.498	0.097	0		214.76
21	CPIJ000849-RA	supercont3.9:249068-256606	11.817	18.839	452.177	443.386	0.152	0		154.395
22	CPIJ000853-RA	supercont3.9:316971-330807	13.743	55.306	368.152	521.411	0.186	0.019		159.803
23	CPIJ000889-RA	supercont3.9:1197790-1199741	54.71	87.945	199.662	125.995	135.671	965.028		261.502
24	CPIJ000938-RA	supercont3.11:108163-109101	0	0.104	0.684	0	1526.27	45.735		262.131
25	CPIJ000948-RA	supercont3.11:483095-485055	8.09	14.477	350.471	532.514	0.453	2.967		151.495
26	CPIJ000995-RA	supercont3.11:1555108-1562577	558.129	351.942	1.712	1.143	0.37	0.41		152.284
27	CPIJ001119-RA	supercont3.13:958104-958891	2.586	5.8	62.357	26.623	0.531	0.78		16.4462
28	CPIJ001120-RA	supercont3.13:970514-974162	141.763	59.205	2.74	1.545	0.573	4.634		35.0767
29	CPIJ001132-RA	supercont3.13:1029637-1038180	95.79	74.17	703.896	453.874	20.9	57.602		234.372
30	CPIJ001180-RA	supercont3.14:1210373-1211003	7.39	11.082	113.857	76.063	1.428	1.299		35.1865
31	CPIJ001218-RA	supercont3.14:1699942-1700583	8.416	9.127	127.877	72.258	1.061	2.079		36.803
32	CPIJ001220-RA	supercont3.14:1707897-1709055	5.789	5.608	68.875	43.409	1.526	2.079		21.2143
33	CPIJ001270-RA	supercont3.15:687545-688882	14.26	9.943	151.933	109.773	1.724	3.378		48.5018
34	CPIJ001371-RA	supercont3.20:137311-139849	209.282	103.529	1.731	0.871	0.202	0.78		52.7325
35	CPIJ001547-RA	supercont3.17:397338-409030	27.966	28.167	196.097	151.682	30.006	7.636		73.5923
36	CPIJ001563-RA	supercont3.17:606025-607552	10.69	12.825	432.518	374.937	0.332	0.78		138.68
37	CPIJ001671-RA	supercont3.19:726685-729755	134.249	79.23	0.286	0.158	0.716	0.52		35.8598
38	CPIJ001696-RA	supercont3.19:1131454-1136625	2.048	1.37	6.829	5.492	1.371	118.585		22.6158
39	CPIJ001706-RA	supercont3.19:1361079-1362017	0.997	0.829	1.869	0.752	21.269	77.755		17.2452
40	CPIJ001707-RA	supercont3.19:1361669-1362778	1.067	0.932	3.291	1.743	21.534	77.236		17.6338
41	CPIJ001710-RA	supercont3.19:1391957-1398481	3.604	5.12	338.71	265.711	0.116	0		102.21
42	CPIJ001717-RA	supercont3.19:1490430-1493287	29.586	33.276	5.705	4.26	44.466	25.888		23.8635
43	CPIJ001865-RA	supercont3.26:220857-221388	1.067	5.852	3.719	10.376	8.693	0		4.95117
44	CPIJ001871-RA	supercont3.26:242969-243788	2.6	40.961	13.751	295.196	0	0		58.7513
45	CPIJ001901-RA	supercont3.26:1107856-1111784	62.01	26.659	18.52	18.467	55.811	124.243		50.9517
46	CPIJ002181-RA	supercont3.29:258205-260896	0.698	0.708	2.985	2.218	39.771	26.765		12.1908
47	CPIJ002184-RA	supercont3.29:273224-282289	408.35	186.301	4.469	2.807	1.634	4.388		101.325
48	CPIJ002197-RA	supercont3.29:773963-777118	465.843	445.443	1.795	1.505	0.252	0		152.473
49	CPIJ002236-RA	supercont3.30:599330-603152	3.217	20.064	95.91	48.404	0.174	0.052		27.9702
50	CPIJ002271-RA	supercont3.30:1158410-1161226	31.888	47.96	1435.79	1311.05	0.829	0.78		471.383
51	CPIJ002358-RA	supercont3.33:657975-680979	16.557	34.271	740.881	537.537	0.614	0.567		221.738
52	CPIJ002370-RA	supercont3.33:936672-940480	85.397	24.655	12.558	5.199	6.744	10.805		24.2263
53	CPIJ002431-RA	supercont3.32:673020-673616	2.573	5.075	127.712	87.581	0.199	1.039		37.3632
54	CPIJ002573-RA	supercont3.42:238387-239084	820.582	255.244	0.926	0.396	0.033	0		179.53
55	CPIJ002710-RA	supercont3.36:833571-842460	3.974	4.634	22.595	15.356	25.878	471.711		90.6913
56	CPIJ002757-RA	supercont3.36:1199309-1200662	111.2	15.238	1.056	0.951	2.671	2.858		22.329
57	CPIJ002823-RA	supercont3.46:1223826-1233275	264.771	31.172	0.81	0.475	0.171	0.382		49.6302
58	CPIJ002843-RA	supercont3.37:45659-46101	0.821	1.45	62.576	43.802	0.398	0.52		18.2612
59	CPIJ002859-RA	supercont3.37:281171-284003	6.419	10.702	384.237	363.436	0.597	0.26		127.608
60	CPIJ003009-RA	supercont3.45:987897-991828	16.512	15.22	95.028	35.343	9.789	11.174		30.511
61	CPIJ003013-RA	supercont3.45:1056390-1058590	57.228	23.717	155.754	121.777	4.71	3.638		61.1373
62	CPIJ003019-RA	supercont3.45:1164561-1190101	668.188	2126.21	968.198	129.794	46.359	0.553		656.55
63	CPIJ003098-RA	supercont3.39:289046-291556	20.52	7.609	72.172	26.456	25.531	29.754		30.3403
64	CPIJ003099-RA	supercont3.39:291688-292373	5.882	5.666	75.537	40.114	2.056	1.386		21.7735
65	CPIJ003115-RA	supercont3.39:843465-853293	412.63	231.386	2.957	1.992	0.346	0.214		108.254
66	CPIJ003139-RA	supercont3.43:69227-70197	1.724	2.02	94.772	62.845	1.207	0.52		27.1813
67	CPIJ003205-RA	supercont3.43:1185676-1186164	95.552	26.586	37.279	52.903	417.655	421.88		175.309
68	CPIJ003233-RA	supercont3.41:282390-284987	207.295	45.76	0.513	0.561	0.265	0		42.399
69	CPIJ003281-RA	supercont3.47:403991-407896	5.209	25.947	118.372	165.845	0.554	0.26		52.6978
70	CPIJ003435-RA	supercont3.49:965259-967029	277.67	207.586	0.627	0.317	0.232	0		81.072
71	CPIJ003470-RA	supercont3.48:178792-179426	1.683	8.139	20.569	41.525	0	0		11.986
72	CPIJ003536-RA	supercont3.48:1074165-1075355	6.035	26.936	138.089	58.769	0.332	0.78		38.4902
73	CPIJ003588-RA	supercont3.50:592645-593725	2.925	7.398	131.523	472.513	0.234	0.433		102.504
74	CPIJ003589-RA	supercont3.50:594902-598153	16.157	34.493	209.069	166.613	4.07	3.261		72.2772
75	CPIJ003608-RA	supercont3.50:876601-880213	8.413	13.208	486.323	494.664	0.274	0.78		167.277
76	CPIJ003615-RA	supercont3.50:1095865-1096754	1.396	0	97.118	0	0	0		16.419
77	CPIJ003797-RA	supercont3.52:511739-513538	14.996	15.289	127.706	84.547	23.26	44.676		51.7457
78	CPIJ003817-RA	supercont3.52:1133011-1139887	36.055	66.619	5.317	3.362	445.084	0.391		92.8047
79	CPIJ003890-RA	supercont3.56:499490-501449	15.395	17.714	187.148	124.272	2.079	2.599		58.2012
80	CPIJ004023-RA	supercont3.57:628448-633144	8.905	9.977	591.268	449.55	0.679	1.362		176.957
81	CPIJ004070-RA	supercont3.60:320626-323059	18.682	8.133	72.814	83.379	0.234	0.873		30.6858
82	CPIJ004073-RA	supercont3.60:340337-341371	6.952	6.58	88.141	58.258	2.532	0.78		27.2072
83	CPIJ004239-RA	supercont3.63:441900-444315	179.723	66.602	15.92	7.683	3.804	1.862		45.9323
84	CPIJ004422-RA	supercont3.66:872247-874538	239.225	45.956	0.135	0.206	0.039	0.013		47.5957
85	CPIJ004451-RA	supercont3.67:159422-166646	264.654	102.089	1.274	1.021	0.578	0.612		61.7047
86	CPIJ004453-RA	supercont3.67:170188-171894	80.38	37.166	0.178	0.04	0.133	0		19.6495
87	CPIJ004532-RA	supercont3.73:1042587-1044210	32.726	4.937	58.956	38.626	1.651	1.299		23.0325
88	CPIJ004577-RA	supercont3.74:863896-864513	3.448	5.361	66.987	41.123	1.061	1.039		19.8365
89	CPIJ004628-RA	supercont3.70:224146-228425	14.347	35.116	242.254	78.699	0.71	0.029		61.8592
90	CPIJ004713-RA	supercont3.85:213268-213602	3.448	3.936	180.875	144.734	0.212	1.559		55.794
91	CPIJ004714-RA	supercont3.85:227314-239362	1146.36	133.186	14.737	11.042	2.381	4.158		218.643
92	CPIJ004724-RA	supercont3.85:407550-409661	41.129	54.204	1427.89	454.937	46.742	505.852		421.793
93	CPIJ004776-RA	supercont3.75:439782-456778	12.754	44.89	259.813	398.997	0.822	0.407		119.614
94	CPIJ004812-RA	supercont3.76:318197-324855	86.208	129.818	2.873	2.365	0.296	0.319		36.9798
95	CPIJ004823-RA	supercont3.76:758609-762114	6.064	11.086	242.686	236.374	1.067	0.274		82.9252
96	CPIJ004829-RA	supercont3.76:924607-931203	11.01	14.024	296.033	310.751	0.317	1.048		105.531
97	CPIJ004888-RA	supercont3.80:76459-83943	133.156	114.058	209.34	103.089	59.564	79.742		116.491
98	CPIJ004890-RA	supercont3.80:87848-88403	7.403	9.388	17.714	8.779	45.741	6.756		15.9635
99	CPIJ004906-RA	supercont3.80:240013-240949	5.747	6.059	66.865	51.987	13.39	8.445		25.4155
100	CPIJ004935-RA	supercont3.77:372438-373202	5.173	6.628	79.502	60.793	1.924	2.079		26.0165
101	CPIJ004995-RA	supercont3.81:955498-964280	545.673	255.89	1.06	0.547	0.219	0.076		133.911
102	CPIJ004996-RA	supercont3.81:971133-973490	362.829	107.46	0.42	0.33	0.074	0.304		78.5695
103	CPIJ005034-RA	supercont3.89:368633-371090	119.279	44.985	1.802	1.267	6.546	12.083		30.9937
104	CPIJ005315-RA	supercont3.83:836068-836562	32.239	150.401	158.105	153.916	6.026	4.831		84.253
105	CPIJ005342-RA	supercont3.86:541993-544210	4.015	108.154	8.704	4.201	10.305	4.028		23.2345
106	CPIJ005504-RB	supercont3.92:745529-747642	25.007	19.678	154.801	80.274	2.153	10.654		48.7612
107	CPIJ005505-RA	supercont3.92:752866-754601	202.557	143.501	260.166	246.559	206.134	540.766		266.614
108	CPIJ005508-RA	supercont3.92:788568-791909	193.266	64.264	4.956	2.618	0.093	0.26		44.2428
109	CPIJ005595-RA	supercont3.95:149811-163266	35.892	39.515	457.969	96.709	1.728	1.989		105.634
110	CPIJ005597-RA	supercont3.95:176007-179700	62.723	50.533	1580	1951.43	1.172	3.118		608.164
111	CPIJ005613-RA	supercont3.95:734300-734814	4.926	7.008	74.495	64.18	1.095	1.126		25.4717
112	CPIJ005621-RA	supercont3.107:359247-366611	79.63	111.161	2.538	1.564	0.32	0.151		32.5607
113	CPIJ005810-RA	supercont3.115:129140-131446	1470.21	23.237	5.267	7.366	757.314	519.197		463.766
114	CPIJ005878-RA	supercont3.111:451880-453247	7.718	7.888	89.78	62.337	2.322	1.819		28.644
115	CPIJ005941-RA	supercont3.104:143240-144692	19.76	44.268	1787.87	1847.94	0.066	0.26		616.693
116	CPIJ006030-RA	supercont3.103:812471-813237	2.215	2.25	106.423	75.708	0.453	0.39		31.2398
117	CPIJ006067-RA	supercont3.106:526989-528338	6.158	6.318	268.404	234.194	1.533	3.248		86.6425
118	CPIJ006159-RA	supercont3.109:396919-397473	2.217	2.118	71.975	146.477	0.033	0		37.1367
119	CPIJ006167-RA	supercont3.109:627822-632042	11.625	10.362	224.029	210.96	0.047	0.26		76.2138
120	CPIJ006209-RA	supercont3.118:643699-647591	29.439	31.734	1015.19	1132.93	1.099	2.864		368.877
121	CPIJ006225-RA	supercont3.118:843560-845245	4.144	5.848	271.104	214.035	0.373	2.093		82.9328
122	CPIJ006281-RA	supercont3.112:582536-584317	1.888	3.055	97.086	90.285	0.232	0.26		32.1343
123	CPIJ006404-RA	supercont3.128:135906-137782	30.52	16.089	0.146	0.119	0.166	0.26		7.88333
124	CPIJ006480-RA	supercont3.129:630105-631247	11.659	7.25	111.511	59.424	14.795	14.812		36.5752
125	CPIJ006586-RA	supercont3.121:842462-843372	43.161	1.761	0.046	0.238	0.083	0.13		7.56983
126	CPIJ006622-RA	supercont3.122:504741-507342	383.129	75.315	0.551	0.478	0	0		76.5788
127	CPIJ006623-RA	supercont3.122:507391-519656	73.892	51.293	154.391	137.305	31.696	398.063		141.107
128	CPIJ006627-RA	supercont3.122:550821-551872	1040.33	284.589	1.083	0.396	0	0		221.067
129	CPIJ006628-RA	supercont3.122:551889-557015	84.012	22.438	0.799	0.553	0.266	0.149		18.0362
130	CPIJ006724-RA	supercont3.156:174579-177406	62.205	68.781	76.219	53.861	14.012	39.022		52.35
131	CPIJ006726-RA	supercont3.156:212705-216761	95.168	69.555	1.33	0.475	0.166	0.13		27.804
132	CPIJ006749-RA	supercont3.156:670475-685646	282.551	185.976	464.193	274.125	290.116	596.129		348.848
133	CPIJ006763-RA	supercont3.124:334865-336419	13.353	10.668	97.588	76.384	6.833	7.536		35.3937
134	CPIJ006764-RA	supercont3.124:358050-359404	8.319	8.235	103.8	31.512	11.124	14.329		29.5532
135	CPIJ006836-RA	supercont3.145:506228-515766	193.812	162.736	3.938	2.435	0.945	0.827		60.7822
136	CPIJ006851-RA	supercont3.131:540170-544201	307.649	212.613	0.926	1.426	0.564	0.52		87.283
137	CPIJ006894-RA	supercont3.149:534727-603314	37.886	60.548	1471	703.486	7.147	1.529		380.266
138	CPIJ006971-RA	supercont3.153:607980-614970	118.446	10.817	2.349	0.94	1.296	0.03		22.313
139	CPIJ006974-RA	supercont3.153:697248-699192	328.437	136.121	0.845	0.649	7.371	9.47		80.4822
140	CPIJ007096-RA	supercont3.155:299180-303603	186.972	192.271	2.452	3.503	0.348	0.78		64.3877
141	CPIJ007158-RA	supercont3.143:385773-388831	292.438	229.544	9.313	4.683	3.708	2.339		90.3375
142	CPIJ007204-RA	supercont3.163:778885-794991	44.679	118.963	609.337	374.76	0.452	0.087		191.38
143	CPIJ007330-RA	supercont3.157:38728-39254	592.084	1733.52	3128.83	6157.35	753.17	1282.89		2274.64
144	CPIJ007338-RA	supercont3.157:325943-347890	15.994	16.794	562.449	340.603	0.903	0.992		156.289
145	CPIJ007376-RA	supercont3.147:436171-442836	17.74	18.368	99.819	31.874	3.074	7.051		29.6543
146	CPIJ007382-RA	supercont3.147:501433-509995	21.485	54.241	178.951	66.331	87.488	66.149		79.1075
147	CPIJ007388-RA	supercont3.147:571884-572430	22.738	94.702	270.157	84.29	4.551	31.118		84.5927
148	CPIJ007392-RA	supercont3.147:639562-639700	5.134	21.599	84.048	22.206	0.182	24.492		26.2768
149	CPIJ007393-RA	supercont3.147:640273-644992	98.251	60.461	3.596	2.573	0.62	2.105		27.9343
150	CPIJ007454-RA	supercont3.166:536594-536880	1.006	0.207	154	7.129	0	0		27.057
151	CPIJ007538-RA	supercont3.178:143073-144976	8.813	17.727	129.949	378.637	2.265	2.079		89.9117
152	CPIJ007539-RA	supercont3.178:145373-145905	1.888	4.557	35.956	109.136	0.184	0.78		25.4168
153	CPIJ007628-RA	supercont3.148:205303-217971	176.924	20.471	6.531	5.164	123.711	272.963		100.961
154	CPIJ007686-RA	supercont3.175:11499-18403	18.921	17.879	103.481	68.109	16.828	141.493		61.1185
155	CPIJ007687-RA	supercont3.175:21931-28432	54.611	51.66	73.425	60.818	23.164	136.788		66.7443
156	CPIJ007698-RA	supercont3.175:440583-441543	4.694	4.112	67.306	35.779	1.461	0.39		18.957
157	CPIJ007777-RA	supercont3.162:571541-571960	1.478	2.693	39.409	27.802	0.022	0.26		11.944
158	CPIJ007834-RA	supercont3.171:206258-218249	571.367	301.918	7.417	5.791	6.051	6.678		149.87
159	CPIJ007865-RA	supercont3.189:151075-160058	176.262	178.746	3.158	1.789	2.532	4.335		61.137
160	CPIJ007980-RA	supercont3.186:427697-432199	25.595	40.794	664.773	518.733	2.093	2.093		209.014
161	CPIJ007989-RA	supercont3.186:611113-617638	204.641	98.39	1.105	0.783	0.547	0.91		51.0627
162	CPIJ008014-RA	supercont3.191:135206-146338	5.11	6.269	317.426	246.716	0.132	0.161		95.969
163	CPIJ008101-RA	supercont3.184:224704-233428	98.258	87.263	3561.33	3046.74	2.146	3.025		1133.13
164	CPIJ008103-RA	supercont3.184:249215-250317	13.794	14.189	101.906	51.979	8.868	287.144		79.6467
165	CPIJ008122-RA	supercont3.169:114881-116281	45.282	14.31	0.205	0	0	0		9.96617
166	CPIJ008168-RA	supercont3.183:431769-437702	123.552	379.881	464.092	453.719	50.871	31.302		250.569
167	CPIJ008169-RA	supercont3.183:459853-461098	77.02	357.909	531.223	501.942	17.188	15.605		250.148
168	CPIJ008189-RA	supercont3.168:107281-109389	2.874	3.521	11.965	4.396	8.945	111.219		23.82
169	CPIJ008200-RA	supercont3.168:362154-362986	10.592	12.066	618.445	421.433	1.061	1.039		177.439
170	CPIJ008221-RA	supercont3.174:409832-418432	5.589	16.957	598.43	882.864	0.618	0.05		250.751
171	CPIJ008287-RA	supercont3.167:469463-470789	44.379	4.557	3.932	1.188	0.42	0.26		9.12267
172	CPIJ008289-RA	supercont3.167:479335-485436	18.47	23.121	148.167	357.424	1.314	6.648		92.524
173	CPIJ008356-RA	supercont3.176:714313-715084	2.956	3.918	159.595	114.813	0.63	0.78		47.1153
174	CPIJ008366-RA	supercont3.185:122241-123886	7.043	10.057	339.999	347.057	0.708	0.289		117.526
175	CPIJ008421-RA	supercont3.193:373555-375076	209.012	50.17	192.671	121.882	181.881	1032.16		297.962
176	CPIJ008485-RA	supercont3.192:511711-534618	347.193	218.612	863.729	362.723	78.303	356.293		371.142
177	CPIJ008563-RA	supercont3.196:189619-201828	146.111	242.297	21.981	15.433	0.481	0.677		71.1633
178	CPIJ008578-RA	supercont3.196:636705-639133	214.534	147.016	0.629	0.421	0.973	0.65		60.7038
179	CPIJ008584-RA	supercont3.196:658380-659203	19.589	11.289	134.924	102.037	1.824	2.599		45.377
180	CPIJ008622-RA	supercont3.202:627293-630621	1.754	0.362	0.221	0.042	53.085	3.378		9.807
181	CPIJ008665-RA	supercont3.198:433174-434628	3.572	2.112	107.53	78.502	0.372	0.938		32.171
182	CPIJ008688-RA	supercont3.198:560979-570023	7.611	15.017	668.618	386.108	0.301	0		179.609
183	CPIJ008759-RA	supercont3.205:96977-100521	4.468	3.237	112.272	75.413	0.213	0.415		32.6697
184	CPIJ009028-RA	supercont3.216:517592-525971	269.273	95.171	3.994	2.504	0.749	0.635		62.0543
185	CPIJ009053-RA	supercont3.211:454817-459840	142.341	263.36	0.83	0.868	0.474	0.382		68.0425
186	CPIJ009091-RA	supercont3.213:174510-186638	306.688	125.426	2.224	1.302	5.411	4.324		74.2292
187	CPIJ009147-RA	supercont3.220:356619-367750	259.005	124.842	0.901	0.768	0.699	0.913		64.5213
188	CPIJ009186-RA	supercont3.215:466134-483687	87.015	245.906	1510.27	1239.93	52.704	219.23		559.176
189	CPIJ009280-RA	supercont3.218:427417-428881	2.874	5.124	143.137	145.058	0.133	0		49.3877
190	CPIJ009303-RA	supercont3.222:570227-573216	110.001	70.661	259.905	87.276	6.856	10.136		90.8058
191	CPIJ009445-RA	supercont3.239:397597-402750	65.746	59.679	139.544	69.928	58.185	74.299		77.8968
192	CPIJ009501-RA	supercont3.235:338440-340209	20.239	18.376	122.794	72.582	35.416	86.013		59.2367
193	CPIJ009511-RA	supercont3.235:536084-541217	178.302	63.233	3.498	2.754	0.211	0		41.333
194	CPIJ009519-RA	supercont3.238:403392-403960	1.396	2.641	51.98	22.495	0.332	1.559		13.4005
195	CPIJ009601-RA	supercont3.259:469603-474016	43.229	81.586	0.257	0.277	0.282	0		20.9385
196	CPIJ009655-RA	supercont3.245:267772-273161	5.031	5.917	142.485	71.487	0.717	0.361		37.6663
197	CPIJ009656-RA	supercont3.245:273544-274622	1.943	1.968	104.244	30.575	0	0		23.1217
198	CPIJ009672-RA	supercont3.260:17067-17750	7.554	9.031	323.372	261.332	0.332	0.52		100.357
199	CPIJ009743-RA	supercont3.252:465929-469636	3.726	13.353	141.991	269.165	0.087	0.014		71.3893
200	CPIJ010022-RA	supercont3.246:249264-250192	3.448	5.911	95.046	72.951	0.398	0.78		29.7557
201	CPIJ010053-RA	supercont3.254:98358-109393	603.9	210.798	1.938	1.219	1.694	3.255		137.134
202	CPIJ010057-RA	supercont3.254:196920-200878	4261.35	497.764	16.349	12.098	41.686	81.7		818.491
203	CPIJ010069-RA	supercont3.257:58922-67101	0.411	0.888	2.967	0.484	211.281	258.965		79.166
204	CPIJ010080-RA	supercont3.257:142668-146099	220.756	240.215	0.307	0.391	0.03	0.037		76.956
205	CPIJ010197-RA	supercont3.289:397402-403057	122.477	17.588	0.346	0.138	0.197	0.234		23.4967
206	CPIJ010208-RA	supercont3.284:34547-35988	6.404	25.44	0.874	3.776	0	0		6.08233
207	CPIJ010237-RA	supercont3.261:123988-125710	517.683	2027.84	3282.47	5979.66	1227.09	2226.41		2543.53
208	CPIJ010238-RA	supercont3.261:126200-126366	62.506	270.983	365.459	777.228	37.966	100.64		269.13
209	CPIJ010239-RA	supercont3.261:126668-142769	64.774	221.921	464.745	490.496	36.248	71.224		224.901
210	CPIJ010291-RA	supercont3.262:465632-470708	3.992	8.069	235.715	295.677	0.413	0.419		90.7142
211	CPIJ010329-RA	supercont3.295:298597-313821	16.647	11.164	98.101	53.125	46.132	304.375		88.2573
212	CPIJ010330-RA	supercont3.295:315122-316032	4.461	1.795	22.105	15.551	36.303	40.798		20.1688
213	CPIJ010344-RA	supercont3.295:406439-412061	164.162	70.381	1.801	0.918	1.15	5.53		40.657
214	CPIJ010551-RA	supercont3.278:453163-456670	67.579	18.997	0.207	0.019	0.182	0.235		14.5365
215	CPIJ010624-RA	supercont3.303:58266-62107	90.402	46.209	306.208	255.903	2.453	13.253		119.071
216	CPIJ010625-RA	supercont3.303:63465-64166	15.108	64.489	77.811	62.892	24.669	695.901		156.812
217	CPIJ010646-RA	supercont3.275:180833-184782	95.83	27.77	0.45	0.238	1.204	1.968		21.2433
218	CPIJ010682-RA	supercont3.280:178509-179156	5.173	6.887	102.601	51.452	0.995	0.78		27.9813
219	CPIJ010795-RA	supercont3.281:22874-31019	186.744	97.47	0.68	0.502	0.15	0.828		47.729
220	CPIJ010827-RA	supercont3.309:92852-97878	238.959	135.467	271.283	175.514	57.919	172.11		175.209
221	CPIJ010860-RA	supercont3.332:334743-337474	101.853	52.768	1.054	0.554	0.022	0		26.0418
222	CPIJ010882-RA	supercont3.294:426109-428080	142.87	29.593	0.361	0.417	0.066	0		28.8845
223	CPIJ010913-RA	supercont3.287:4833-8930	239.203	108.635	1.244	1.347	0.269	0.52		58.5363
224	CPIJ010915-RA	supercont3.287:15717-20509	169.014	50.881	0.61	0.043	0.685	0.654		36.9812
225	CPIJ010918-RA	supercont3.287:30675-31749	15.357	13.078	87.396	42.705	2.61	2.079		27.2042
226	CPIJ010965-RA	supercont3.337:149128-162633	247.906	20.087	13.216	11.091	0.857	3.134		49.3818
227	CPIJ010998-RA	supercont3.290:193526-198801	16.635	8.005	20.47	43.806	7.591	388.045		80.7587
228	CPIJ011156-RA	supercont3.298:222128-227674	212.418	104.929	3.855	4.831	4.556	4.937		55.921
229	CPIJ011179-RA	supercont3.299:96993-97898	1.971	1.991	83.418	57.582	0.205	0.78		24.3245
230	CPIJ011206-RA	supercont3.397:126392-126708	0.657	0.829	40.649	26.376	0	1.039		11.5917
231	CPIJ011270-RA	supercont3.322:222354-226909	87.197	5.397	4.744	6.277	0.573	1.039		17.5378
232	CPIJ011376-RA	supercont3.325:125402-127137	298.434	532.574	259.229	105.614	1677.39	13899.4		2795.43
233	CPIJ011420-RA	supercont3.327:130449-130778	5.173	9.632	122.975	44.515	13.136	23.907		36.5563
234	CPIJ011528-RA	supercont3.340:133356-138321	4.319	4.526	140.178	109.546	1.82	1.689		43.6797
235	CPIJ011530-RA	supercont3.340:138940-142791	24.378	21.044	27.922	16.646	4.091	160.452		42.4222
236	CPIJ011571-RA	supercont3.361:253308-254762	1.576	2.932	92.123	143.941	0	0		40.0953
237	CPIJ011589-RA	supercont3.361:384970-386492	17.085	16.967	173.136	108.934	19.77	29.949		60.9735
238	CPIJ011598-RA	supercont3.364:88508-99127	253.287	235.121	1.988	1.276	0.943	2.209		82.4707
239	CPIJ011659-RA	supercont3.333:286260-298054	1287.06	649.789	5.737	4.158	0.548	0.268		324.593
240	CPIJ011691-RA	supercont3.328:179972-180892	5.337	8.596	263.753	183.96	0.907	1.559		77.352
241	CPIJ011741-RA	supercont3.344:273586-277710	202.452	150.623	0.46	0.408	1.116	1.126		59.3642
242	CPIJ011774-RA	supercont3.384:84476-98012	750.475	423.292	11.722	9.933	10.856	11.754		203.005
243	CPIJ011929-RA	supercont3.356:353795-355522	7.316	12.307	496.072	424.999	0.531	0		156.871
244	CPIJ011944-RA	supercont3.350:1207-1728	1.16	2.589	65.492	31.763	0.142	2.858		17.334
245	CPIJ011989-RA	supercont3.346:61038-63863	151.821	147.045	1.384	1.083	3.421	4.201		51.4925
246	CPIJ011991-RA	supercont3.346:96796-97422	15.127	54.944	8.864	5.096	86.703	63.978		39.1187
247	CPIJ012090-RA	supercont3.372:68574-70199	2.024	9.544	19.186	903.726	0.111	0.26		155.809
248	CPIJ012129-RA	supercont3.413:181191-184113	313.63	98.685	0.556	0.356	3.064	0.52		69.4685
249	CPIJ012184-RA	supercont3.374:89409-92981	5.527	8.201	51.653	25.392	27.055	72.971		31.7998
250	CPIJ012223-RA	supercont3.373:223686-223936	1.478	1.554	83.074	64.515	0	0		25.1035
251	CPIJ012296-RA	supercont3.385:108753-113958	151.517	492.227	3069.68	1458.06	353.764	457.131		997.064
252	CPIJ012335-RA	supercont3.375:305397-306465	2.674	3.544	168.101	125.482	0.468	1.039		50.218
253	CPIJ012340-RA	supercont3.375:338078-340602	202.672	64.109	1.235	0.396	0.398	0.26		44.845
254	CPIJ012514-RA	supercont3.379:382552-384309	3.079	44.465	1.225	1.228	4.987	2.945		9.65483
255	CPIJ012572-RA	supercont3.396:57385-58588	1.875	3.063	157.716	60.227	0.148	0		37.1715
256	CPIJ012675-RA	supercont3.407:118208-123817	2.732	2.555	59.999	86.301	0.429	0.137		25.3588
257	CPIJ012676-RA	supercont3.407:134170-137034	1.354	47.094	6.203	8.198	0.149	0		10.4997
258	CPIJ012680-RA	supercont3.407:184695-188265	54.184	17.589	0.256	0.238	2.294	3.248		12.9682
259	CPIJ012738-RA	supercont3.417:192002-193071	3.23	2.612	61.197	30.641	0.918	1.689		16.7145
260	CPIJ012878-RA	supercont3.406:380935-381678	3.038	3.482	167.156	126.443	0.265	0.52		50.1507
261	CPIJ012887-RA	supercont3.431:243477-253859	222.684	116.774	2.068	3.035	0.351	0.017		57.4882
262	CPIJ012945-RA	supercont3.416:163049-167390	283.919	114.681	0.609	0.158	0.051	0		66.5697
263	CPIJ012991-RA	supercont3.449:151545-154146	107.564	85.861	0.622	0.475	0.133	2.339		32.8323
264	CPIJ013081-RA	supercont3.442:235838-237525	45.313	83.753	135.679	54.987	341.435	388.099		174.878
265	CPIJ013093-RA	supercont3.442:337068-337782	3.202	4.039	202.835	137.238	0.624	0.78		58.1197
266	CPIJ013141-RA	supercont3.446:317654-320258	1.328	3.31	101.73	111.779	0.036	0.178		36.3935
267	CPIJ013142-RA	supercont3.446:326741-333013	7.417	11.098	128.279	123.746	2.151	5.163		46.309
268	CPIJ013160-RA	supercont3.487:248795-251064	48.999	24.336	0.693	0.871	0.54	0.26		12.6165
269	CPIJ013234-RA	supercont3.436:339108-340958	20.38	15.939	99.697	70.531	23.363	119.746		58.276
270	CPIJ013259-RA	supercont3.463:315270-317506	4.775	15.27	354.054	354.745	0.027	0		121.479
271	CPIJ013324-RA	supercont3.448:201278-203268	17.927	28.488	457.396	468.986	5.166	6.441		164.067
272	CPIJ013343-RA	supercont3.444:215617-217487	19.06	13.976	96.205	63.655	4.014	5.977		33.8145
273	CPIJ013361-RA	supercont3.505:63627-65115	1.994	6.525	54.179	152.724	0	0		35.9037
274	CPIJ013362-RA	supercont3.505:76624-82662	177.064	69.313	2.748	1.422	0.183	0.173		41.8172
275	CPIJ013398-RA	supercont3.456:95260-98621	678.877	510.923	429.312	372.271	0.435	0.91		332.121
276	CPIJ013417-RA	supercont3.483:275817-299619	613.058	530.16	21.201	10.494	0.98	1.886		196.296
277	CPIJ013512-RA	supercont3.469:164202-167902	176.061	6.857	4.338	4.016	0.09	0.021		31.8972
278	CPIJ013518-RA	supercont3.457:12557-18373	367.177	282.709	1.353	0.898	17.529	94.4		127.344
279	CPIJ013524-RA	supercont3.457:329128-331081	188.944	110.491	1.584	0.911	0.066	0.39		50.3977
280	CPIJ013609-RA	supercont3.517:43022-43588	2.135	2.589	159.428	189.045	0	0		58.8662
281	CPIJ013748-RA	supercont3.526:165171-169914	15.441	39.493	304.975	189.343	3.86	124.152		112.877
282	CPIJ013852-RA	supercont3.530:163978-170728	199.629	177.369	4.914	4.315	0.487	1.056		64.6283
283	CPIJ013899-RA	supercont3.613:105493-111103	21.253	26.157	156.524	72.79	21.879	687.252		164.309
284	CPIJ013965-RA	supercont3.550:40529-46592	245.625	230.654	1.366	0.763	0.576	1.999		80.1638
285	CPIJ013966-RA	supercont3.550:55780-56898	10.469	9.735	122.948	83.301	2.554	2.599		38.601
286	CPIJ013990-RA	supercont3.494:63772-65252	0.575	0.621	0.605	0.258	1.14	25.169		4.728
287	CPIJ014062-RA	supercont3.500:265540-266720	41.335	18.425	140.782	109.916	4.815	395.823		118.516
288	CPIJ014084-RA	supercont3.496:66375-67153	0.821	1.761	54.369	41.07	0.133	0		16.359
289	CPIJ014092-RA	supercont3.496:140763-144931	113.009	61.136	1.178	0.421	0.216	1.327		29.5478
290	CPIJ014165-RA	supercont3.503:59422-60629	6.076	8.441	79.161	50.68	1.979	3.638		24.9958
291	CPIJ014171-RA	supercont3.503:127275-133605	203.565	76.273	0.851	0.28	0.783	0.722		47.079
292	CPIJ014241-RA	supercont3.510:303544-306119	17.335	37.647	67.541	33.457	16.337	250.728		70.5075
293	CPIJ014302-RA	supercont3.508:87241-95706	392.682	108.479	2.78	3.887	0.727	0.294		84.8082
294	CPIJ014303-RA	supercont3.508:112465-114754	179.906	193.881	0.272	0.515	0.073	0		62.4412
295	CPIJ014312-RA	supercont3.521:239901-247407	245.06	61.676	1.61	0.513	0.253	0.476		51.598
296	CPIJ014384-RA	supercont3.528:75613-76260	1.971	2.486	176.326	130.318	0.265	0.26		51.9377
297	CPIJ014410-RA	supercont3.536:6355-13814	6.849	8.128	346.331	339.256	1.259	0.426		117.041
298	CPIJ014513-RA	supercont3.571:153726-165044	219.759	162.053	1.724	2.652	1.201	2.183		64.9287
299	CPIJ014540-RA	supercont3.563:269970-271856	11.703	9.808	106.564	75.597	4.348	32.049		40.0115
300	CPIJ014551-RA	supercont3.618:185247-186512	3.366	0.104	327.779	0.174	0	0		55.2372
301	CPIJ014566-RA	supercont3.564:17571-20987	28.588	24.053	128.311	41.882	9.049	42.887		45.795
302	CPIJ014577-RA	supercont3.564:257670-258806	3.695	6.701	321.368	305.135	0.553	2.079		106.588
303	CPIJ014622-RA	supercont3.682:60798-64682	259.287	172.05	0.65	0.277	0.328	2.339		72.4885
304	CPIJ014661-RA	supercont3.660:192374-192897	64.117	4.704	0.29	0.066	0.026	0.832		11.6725
305	CPIJ014791-RA	supercont3.588:265733-269422	76.339	63.259	74.966	87.475	129.308	133.437		94.1307
306	CPIJ014797-RA	supercont3.603:262523-262855	2.135	0.932	29.372	18.614	0.066	0.26		8.56317
307	CPIJ014889-RA	supercont3.574:149164-153896	4.732	5.183	189.432	130.861	0.283	0.537		55.1713
308	CPIJ015022-RA	supercont3.586:166806-170481	2.513	3.131	117.171	149.454	0.094	0		45.3938
309	CPIJ015023-RA	supercont3.586:250630-252932	1.888	4.292	222.357	264.928	0.008	0		82.2455
310	CPIJ015042-RA	supercont3.626:186265-187883	42.695	79.99	316.003	138.444	71.087	300.526		158.124
311	CPIJ015099-RA	supercont3.592:144491-145523	6.569	7.094	113.165	85.545	1.061	2.858		36.0487
312	CPIJ015186-RA	supercont3.632:149543-174345	53.151	53.855	23.944	21.086	826.346	484.751		243.856
313	CPIJ015187-RA	supercont3.617:8046-29104	2773.74	471.284	113.263	90.973	1912.4	1937.04		1216.45
314	CPIJ015365-RA	supercont3.664:145664-165091	316.021	280.301	1.555	0.987	1.428	1.759		100.342
315	CPIJ015366-RA	supercont3.664:170752-172233	106.902	17.762	40.639	2.416	0.995	5.457		29.0285
316	CPIJ015389-RA	supercont3.656:69515-72268	26.562	31.39	85.096	47.75	15.403	480.63		114.472
317	CPIJ015485-RA	supercont3.639:131830-135564	49.747	46.089	112.461	52.565	13.93	38.069		52.1435
318	CPIJ015624-RA	supercont3.652:232715-238398	16.095	12.729	158.036	120.493	2.444	2.919		52.1193
319	CPIJ015673-RA	supercont3.644:239171-242917	266.143	197.449	0.972	1.224	1.753	2.599		78.3567
320	CPIJ015806-RA	supercont3.731:224034-224691	66.602	282.475	465.321	435.164	16.351	8.165		212.346
321	CPIJ015857-RA	supercont3.679:40357-40874	1.149	1.062	75.974	59.644	0.825	2.858		23.5853
322	CPIJ015860-RA	supercont3.679:55203-56323	58.349	235.86	512.968	1436.39	22.399	21.557		381.254
323	CPIJ015882-RA	supercont3.741:211654-212911	5.107	0.971	3.44	0.489	25.283	12.77		8.01
324	CPIJ016035-RA	supercont3.688:100691-109260	667.088	518.131	2.251	2.174	2.449	4.737		199.472
325	CPIJ016362-RA	supercont3.762:67649-69523	3.448	0.621	372.344	33.149	0	0		68.2603
326	CPIJ016408-RA	supercont3.752:38021-43542	35.258	28.773	87.716	49.745	39.028	181.96		70.4133
327	CPIJ016412-RA	supercont3.752:95519-99876	75.625	12.449	0.219	0.515	0.469	1.819		15.1827
328	CPIJ016430-RA	supercont3.760:70114-75487	7.14	5.785	147.156	130.223	0.429	0.597		48.555
329	CPIJ016450-RA	supercont3.766:75198-79923	154.749	142.571	5.102	2.228	1.222	1.319		51.1985
330	CPIJ016534-RA	supercont3.772:2929-4663	220.908	436.518	603.812	1578.28	152.865	64.688		509.511
331	CPIJ016535-RA	supercont3.772:5407-8082	494.149	1861.09	4685.05	3945.65	89.878	131.258		1867.85
332	CPIJ016613-RA	supercont3.776:193159-198061	67.709	260.891	693.775	263.726	15.326	17.321		219.791
333	CPIJ016647-RA	supercont3.780:7729-14583	4.184	5.035	130.449	150.529	0.242	0.276		48.4525
334	CPIJ016748-RA	supercont3.835:92429-99940	179.577	123.463	2.966	4.369	2.265	7.987		53.4378
335	CPIJ016775-RA	supercont3.951:15242-15660	1.806	2.158	30.952	18.83	0.398	0.26		9.06733
336	CPIJ017004-RA	supercont3.846:103948-108182	135.688	9.654	1.472	1.48	0.644	0.065		24.8338
337	CPIJ017123-RA	supercont3.963:118558-121033	3.065	11.016	223.269	391.79	0	0		104.857
338	CPIJ017156-RA	supercont3.883:80057-84450	93.651	43.644	9.948	10.221	310.427	77.698		90.9315
339	CPIJ017217-RB	supercont3.892:21650-23244	6.445	6.525	447.268	319.011	0.415	0		129.944
340	CPIJ017382-RA	supercont3.997:121896-125155	259.047	49.799	36.275	38.454	626.878	621.842		272.049
341	CPIJ017479-RA	supercont3.944:91352-92046	2.792	5.449	183.591	135.383	0.133	0.26		54.6013
342	CPIJ017535-RA	supercont3.1056:132443-135112	123.751	23.981	0.294	0.379	1.19	1.039		25.1057
343	CPIJ017570-RA	supercont3.956:6234-15551	34.772	48.173	207.484	94.679	11.973	4.483		66.9273
344	CPIJ017807-RA	supercont3.1070:111881-116869	122.874	15.74	5.979	7.164	0.213	0.26		25.3717
345	CPIJ017875-RA	supercont3.1074:74899-75590	1.992	3.925	18.289	41.796	0	0		11.0003
346	CPIJ017880-RA	supercont3.1146:56093-58578	522.376	476.478	1.012	0.65	0.026	0.058		166.767
347	CPIJ018021-RA	supercont3.1063:57790-81179	12.482	35.325	494.58	322.912	2.777	2.134		145.035
348	CPIJ018084-RA	supercont3.1120:85584-94972	45.969	53.866	234.996	115.809	65.057	519.494		172.532
349	CPIJ018223-RA	supercont3.1182:2941-8147	86.973	31.174	0.7	0.907	3.047	3.598		21.0665
350	CPIJ018383-RA	supercont3.1183:36471-62966	670.31	313.105	1.895	1.772	1.508	1.144		164.956
351	CPIJ018404-RA	supercont3.1614:106872-109044	63.045	4.129	1.633	1.5	0.066	0		11.7288
352	CPIJ018422-RA	supercont3.1356:49576-69028	391.484	203.408	32.811	31.854	1.094	0.906		110.26
353	CPIJ018479-RA	supercont3.1198:39850-54254	43.763	250.389	7.177	5.41	2.429	1.738		51.8177
354	CPIJ018505-RA	supercont3.1235:54378-79261	1366.26	127.745	20.695	18.864	9.704	30.37		262.272
355	CPIJ018673-RA	supercont3.1234:32886-34580	2.463	3.728	84.376	46.231	1.128	0.26		23.031
356	CPIJ018676-RA	supercont3.1234:47464-57233	38.147	150.505	270.837	526.802	1.567	1.624		164.914
357	CPIJ018688-RA	supercont3.1246:74854-76684	19.864	19.345	132.885	79.487	20.522	529.332		133.572
358	CPIJ018793-RA	supercont3.1284:56989-57618	0.041	0.803	5.861	1.743	20.375	58.737		14.5933
359	CPIJ018794-RA	supercont3.1284:59862-60471	0.041	0.285	3.134	1.267	20.948	90.05		19.2875
360	CPIJ018812-RA	supercont3.1351:84284-87506	171.49	84.684	0.586	0.385	0.202	0.26		42.9345
361	CPIJ018869-RA	supercont3.1453:49779-50500	2.545	3.521	110.011	65.442	0.531	0		30.3417
362	CPIJ018968-RA	supercont3.1381:343-563	0.383	3.568	41.861	14.409	0.199	1.732		10.3587
363	CPIJ019024-RA	supercont3.1391:66652-68629	11.785	26.099	796.965	940.711	1.594	1.819		296.495
364	CPIJ019029-RA	supercont3.1489:25703-41692	239.879	85.366	0.575	0.189	1.074	0.682		54.6275
365	CPIJ019121-RA	supercont3.1518:25274-30380	281.825	241.977	3.242	1.604	0.328	0.029		88.1675
366	CPIJ019172-RA	supercont3.1533:59406-64099	85.705	53.39	0.753	0.799	0.258	0.602		23.5845
367	CPIJ019204-RA	supercont3.1464:13567-16544	712.959	2889.63	6748.11	8677.45	960.454	2833.72		3803.72
368	CPIJ019205-RA	supercont3.1464:20491-21831	173.196	166.922	95.88	80.465	167.938	296.782		163.53
369	CPIJ019206-RA	supercont3.1464:22368-25346	816.768	3352.93	6966.14	9278.17	1024.54	3303.13		4123.61
370	CPIJ019209-RA	supercont3.1464:31135-34112	702.615	2965.31	6652.61	8561.83	982.471	2797.99		3777.14
371	CPIJ019210-RA	supercont3.1464:35419-36317	56.899	10.624	14.046	6.263	17.811	124.793		38.406
372	CPIJ019211-RA	supercont3.1464:39936-42915	826.877	3365.57	6993.4	9204.29	1023.81	3260.22		4112.36
373	CPIJ019221-RA	supercont3.1487:58427-58709	0.985	0	74.511	0.079	0	0		12.5958
374	CPIJ019307-RA	supercont3.1543:33927-40011	405.094	98.597	5.22	1.441	0.9	1.234		85.4143
375	CPIJ019321-RA	supercont3.1565:2575-13267	42.805	17.39	211.68	180.423	92.955	51.453		99.451
376	CPIJ019398-RA	supercont3.1999:34711-35713	1.752	5.475	120.049	211.394	0	0		56.445
377	CPIJ019457-RA	supercont3.1734:17620-20428	94.637	37.71	0.126	0.138	0.036	0		22.1078
378	CPIJ019459-RA	supercont3.1734:27448-31140	63.06	70.125	7.352	6.337	0.332	0.39		24.5993
379	CPIJ019492-RA	supercont3.1679:21595-24819	75.703	14.054	2.293	2.097	13.905	29.204		22.876
380	CPIJ019847-RA	supercont3.2110:24362-25125	1.353	1.835	80.266	57.609	0.287	0.39		23.6233
381	CPIJ019862-RA	supercont3.2018:14864-15439	2.155	3.368	162.478	147.003	0.133	0.13		52.5445
382	CPIJ019922-RA	supercont3.2168:20474-24381	84.603	80.791	0.775	0.663	1.83	1.376		28.3397
383	CPIJ020038-RA	supercont3.2687:18648-19300	75.264	43.161	0.085	0.198	0.072	0		19.7967
384	CPIJ040077-RA	Mt:9910-10436	2.887	16.011	196.502	89.661	0.562	4.006		51.6048
385	CPIJ040080-RA	Mt:3049-3744	43.701	176.92	2231.74	1676.23	2.984	3.551		689.188
386	CPIJ040084-RA	Mt:4038-4729	21.765	78.723	1100.29	749.668	1.462	3.443		325.892
387	CPIJ040088-RA	Mt:8135-9489	29.21	91.827	1135.26	702.785	4.014	6.8		328.316
388	CPIJ040089-RA	Mt:205-1238	9.483	37.265	381.633	190.673	4.577	5.544		104.862
389	CPIJ040095-RA	Mt:2977-3054	2.374	10.343	90.971	130.655	1.039	1.213		39.4325
390	CPIJ040105-RA	Mt:3815-3893	0.712	1.885	10.49	9.769	0.243	0.346		3.9075
391	CPIJ040124-RA	supercont3.1464:4402-4482	7.417	8.473	5.824	20.409	1.703	2.971		7.7995
392	CPIJ040125-RA	supercont3.1464:13124-13204	7.417	8.473	5.824	20.409	1.703	2.971		7.7995
393	CPIJ040126-RA	supercont3.1464:21925-22005	7.417	8.473	5.824	20.409	1.703	2.971		7.7995
394	CPIJ040127-RA	supercont3.1464:30692-30772	7.417	8.473	5.824	20.409	1.703	2.971		7.7995
395	CPIJ040128-RA	supercont3.1464:39493-39573	7.417	8.473	5.824	20.409	1.703	2.971		7.7995
396	CPIJ040129-RA	supercont3.1464:48269-48349	7.417	8.473	5.824	20.409	1.703	2.971		7.7995
397	CPIJ040130-RA	supercont3.1464:56980-57060	7.417	8.473	5.824	20.409	1.703	2.971		7.7995
398	CPIJ040201-RA	supercont3.1813:20298-20380	1.587	7.008	4.236	7.945	19.694	10.203		8.4455
399	CPIJ040217-RA	supercont3.877:58229-58312	1.047	0.971	0.369	0.184	10.67	2.339		2.59667
400	CPIJ040228-RA	supercont3.1054:133911-133993	31.31	56.875	247.503	414.792	31.051	84.454		144.331
401	CPIJ040272-RA	supercont3.293:106981-107065	0.082	0.518	0.228	0	12.274	0		2.18367
402	CPIJ040276-RA	supercont3.280:239759-239842	0.349	0.42	0.211	0.111	18.798	65.255		14.1907
403	CPIJ040302-RA	supercont3.349:111840-111922	57.175	100.146	71.366	40.491	95.335	2259.93		437.407
404	CPIJ040312-RA	supercont3.97:951788-951871	0.328	0.725	0.25	0	5.796	11.087		3.031
405	CPIJ040365-RA	supercont3.44:612249-612331	2.718	0.787	1.017	0.131	37.982	3.486		7.68683
406	CPIJ040395-RA	supercont3.181:385837-385920	1.026	3.129	32.416	30.03	1.377	3.118		11.8493
407	CPIJ040397-RA	supercont3.181:441033-441116	0.742	0.59	0.354	0.362	13.391	1.559		2.833
408	CPIJ040399-RA	supercont3.409:226767-226850	0.082	9.425	0.266	0.475	1.913	13.565		4.28767
409	CPIJ040424-RA	supercont3.165:9204-9287	0.842	1.989	16.843	4.851	1.154	1.819		4.583
410	CPIJ040441-RA	supercont3.7:377734-377818	0.123	0.466	0.221	0.158	12.539	0.52		2.33783
411	CPIJ040450-RA	supercont3.142:774459-774541	1.711	2.118	0.547	0.359	56.924	5.182		11.1402
412	CPIJ040453-RA	supercont3.142:774225-774307	0.807	1.807	0.547	0.28	54.071	4.793		10.3842
413	CPIJ040462-RA	supercont3.299:406793-406875	0.082	0.151	0.009	0	1.482	14.076		2.63333
414	CPIJ040472-RA	supercont3.2329:15183-15265	0.205	0.052	0.141	0	12.033	0.087		2.08633
415	CPIJ040473-RA	supercont3.2584:3425-3508	0	0.186	0.483	0.058	14.076	0.26		2.5105
416	CPIJ040526-RA	supercont3.721:154278-154361	9.903	25.09	55.276	162.101	4.034	58.982		52.5643
417	CPIJ040571-RA	supercont3.24:1120129-1120211	0.152	3.666	1.103	0.7	33.861	6.967		7.7415
418	CPIJ040577-RA	supercont3.1089:53006-53088	31.942	58.452	256.998	417.068	30.799	97.274		148.756
419	CPIJ040589-RA	supercont3.950:11270-11352	2.489	3.042	0.984	2.165	12.45	5.544		4.44567
420	CPIJ040593-RA	supercont3.2210:235-327	0.739	0.751	0.18	0.238	29.291	3.248		5.74117
421	CPIJ040602-RA	supercont3.19:1468136-1468218	8.564	20.025	2.151	0.989	1232.1	99.321		227.192
422	CPIJ040607-RA	supercont3.19:1493378-1493460	5.408	3.431	0.284	0.563	0.942	33.035		7.27717
