# Supplementary material for: A mosquito small RNA genomics resource reveals dynamic evolution and host responses to viruses and transposons
Source: HighWire-hosted journal article supplement (doi:10.1101/gr.265157.120), 2021-01-08
Supplement: SupplementalTableS5.xlsx [file SupplementalTableS5.xlsx]

## Sheet: TableS5_AeAeg_MetaTable
Table S5. Metatable of AeAeg samples and cell lines, and additional tabs of top Genic and Intergenic piRNA clusters.
Updated Sample Name	Library Size (all replicates)	Percent Genome Mapped	miRNA counts	siRNA counts	piRNA counts	Virus counts	TE counts	Genecentric count	Intergenic counts	StructureRNA_Derived_siRNA	StructureRNA_Derived_piRNA	Source			Sum	Updated Sample Name	miRNA counts	siRNA counts	piRNA counts	Virus counts	TE counts	Genecentric count	Intergenic counts	StructureRNA_Derived_siRNA	StructureRNA_Derived_piRNA
AeAeg_Aag2_NL_cells	26762744	0.77	116526	368226	814660	15330	85582	963314	107053	186594	31168	AeAeg_Aag2			2688453	AeAeg_Aag2_NL_cells	0.0433431	0.136966	0.303022	0.00570216	0.0318332	0.358315	0.0398196	0.0694057	0.0115933
AeAeg_Fcarc_TC	15108268	0.92	156612	261391	486179	509	31518	675436	119559	223326	65410	AeAeg_experiment_20181221			2019940	AeAeg_Fcarc_TC	0.077533	0.129405	0.24069	0.000251988	0.0156034	0.334384	0.0591894	0.110561	0.0323821
AeAeg_Ovary_TC_rr	3494710	0.92	8843	73943	337907	1823	76475	822824	219336	12299	2935	AeAeg_experiment_20181221 + AeAeg_experiment_20190320			1556385	AeAeg_Ovary_TC_rr	0.00568176	0.0475095	0.21711	0.0011713	0.0491363	0.528676	0.140927	0.00790229	0.00188578
AeAeg_Fcarc_GH_rep1	41101576	0.94	16851	223081	624900	637	16927	271649	15566	325813	178950	AeAeg_experiment_20181221			1674374	AeAeg_Fcarc_GH_rep1	0.0100641	0.133232	0.373214	0.000380441	0.0101094	0.162239	0.00929661	0.194588	0.106876
AeAeg_Ovary_GH	40264775	0.92	30989	193158	578238	829	70297	670798	127933	116543	42793	AeAeg_experiment_20181221			1831578	AeAeg_Ovary_GH	0.0169193	0.10546	0.315705	0.000452615	0.0383806	0.36624	0.0698485	0.0636298	0.023364
AeAeg_CCL-125_cells	62386084	0.92	41190	172222	841890	44749	124436	1013580	161821	60135	39291	AeAeg_experiment_20181003			2499314	AeAeg_CCL-125_cells	0.0164805	0.0689077	0.336848	0.0179045	0.0497881	0.405543	0.0647462	0.0240606	0.0157207
AeAeg_Aag2_Ctrl_rep1	3003682	0.88	125733	240581	706029	42015	111468	1676810	186105	9209	1876	AeAeg_experiment_20181003			3099826	AeAeg_Aag2_Ctrl_rep1	0.0405613	0.0776111	0.227764	0.013554	0.0359594	0.540937	0.0600372	0.00297081	0.000605195
AeAeg_Aag2_DENV1_rep1	10504321	0.81	144531	496763	524349	52580	105296	1209630	139440	43077	7702	AeAeg_experiment_20181003			2723368	AeAeg_Aag2_DENV1_rep1	0.0530707	0.182408	0.192537	0.019307	0.0386639	0.444167	0.0512013	0.0158175	0.00282812
AeAeg_Aag2_DENV2NGC_rep1	9791570	0.95	172967	203509	641213	61710	140959	1613170	171223	17800	3530	AeAeg_experiment_20181003			3026081	AeAeg_Aag2_DENV2NGC_rep1	0.0571587	0.0672517	0.211896	0.0203927	0.0465814	0.533089	0.0565824	0.0058822	0.00116653
AeAeg_Aag2_DENV2K0048_rep1	23858679	0.47	20087	741616	1052054	8180	37341	267403	28406	72617	47056	AeAeg_experiment_20181003			2274760	AeAeg_Aag2_DENV2K0048_rep1	0.00883038	0.326019	0.46249	0.00359598	0.0164154	0.117552	0.0124875	0.0319229	0.0206861
AeAeg_Aag2_DENV3_rep1	7724372	0.74	156403	665262	421186	61715	132354	789689	135836	27369	3476	AeAeg_experiment_20181003			2393290	AeAeg_Aag2_DENV3_rep1	0.0653506	0.27797	0.175986	0.0257867	0.0553021	0.32996	0.056757	0.0114357	0.00145239
AeAeg_Aag2_DENV4_rep1	5301204	0.9	118031	324070	629401	57406	127853	1759510	162254	26448	5147	AeAeg_experiment_20181003			3210120	AeAeg_Aag2_DENV4_rep1	0.0367684	0.100953	0.196068	0.0178828	0.0398281	0.548113	0.0505445	0.00823894	0.00160337
AeAeg_Aag2_Zika_PR_rep1_rr	1586128	0.67	75303	455833	252952	19292	38320	394098	45235	7006	1085	AeAeg_experiment_20181003 + AeAeg_experiment_20190320			1289124	AeAeg_Aag2_Zika_PR_rep1_rr	0.0584141	0.353599	0.19622	0.0149652	0.0297256	0.30571	0.0350897	0.0054347	0.000841657
AeAeg_Aag2_Zika_OW_rep1	18790655	0.72	78433	569053	457529	169616	101905	733652	158813	13168	3444	AeAeg_experiment_20190320			2285613	AeAeg_Aag2_Zika_OW_rep1	0.034316	0.248972	0.200178	0.0742103	0.0445854	0.320987	0.0694838	0.00576126	0.00150682
AeAeg_Aag2_Ctrl_rep2	23177622	0.88	85291	211550	569728	133776	133494	1082750	209746	17209	3893	AeAeg_experiment_20190320			2447437	AeAeg_Aag2_Ctrl_rep2	0.0348491	0.0864374	0.232786	0.0546596	0.0545444	0.442402	0.0857003	0.00703144	0.00159064
AeAeg_Aag2_DENV1_rep2	14797865	0.9	132167	198255	596453	148799	156808	859797	239360	18110	5120	AeAeg_experiment_20190320			2354869	AeAeg_Aag2_DENV1_rep2	0.056125	0.0841894	0.253285	0.0631878	0.0665888	0.365115	0.101645	0.00769045	0.00217422
AeAeg_Aag2_DENV2NGC_rep2	15847263	0.91	110997	211357	554922	147940	136478	852804	216168	31495	12977	AeAeg_experiment_20190320			2275138	AeAeg_Aag2_DENV2NGC_rep2	0.0487869	0.0928985	0.243907	0.0650246	0.0599867	0.374836	0.0950131	0.0138431	0.00570383
AeAeg_Aag2_DENV2K0048_rep2	18493269	0.75	89730	531451	492295	157189	117857	764347	184402	19908	6858	AeAeg_experiment_20190320			2364037	AeAeg_Aag2_DENV2K0048_rep2	0.0379563	0.224807	0.208243	0.0664918	0.0498541	0.323323	0.078003	0.00842119	0.00290097
AeAeg_Aag2_DENV3_rep2	25877137	0.89	150327	191068	620180	152486	154299	985120	215110	16659	4921	AeAeg_experiment_20190320			2490170	AeAeg_Aag2_DENV3_rep2	0.0603682	0.0767289	0.249051	0.0612352	0.0619632	0.395604	0.0863837	0.0066899	0.00197617
AeAeg_Aag2_DENV4_rep2	23276738	0.89	117254	197114	601466	131241	144084	1023220	210315	13459	3523	AeAeg_experiment_20190320			2441676	AeAeg_Aag2_DENV4_rep2	0.0480219	0.080729	0.246333	0.0537504	0.0590103	0.419065	0.0861355	0.0055122	0.00144286
AeAeg_Aag2_Zika_PR_rep2	23497019	0.88	119032	201704	610749	145839	148321	1073910	209566	12218	3088	AeAeg_experiment_20190320			2524427	AeAeg_Aag2_Zika_PR_rep2	0.0471521	0.0799009	0.241936	0.0577711	0.0587543	0.425407	0.0830153	0.00483991	0.00122325
AeAeg_Aag2_Zika_OW_rep2	19582603	0.72	87605	550568	494581	177410	108839	853315	163250	12714	3361	AeAeg_experiment_20190320			2451643	AeAeg_Aag2_Zika_OW_rep2	0.0357332	0.224571	0.201735	0.0723637	0.0443943	0.348058	0.066588	0.00518591	0.00137092
AeAeg_Aag2_Qmatrix_rep1	1391194	0.61	18769	184747	164377	17917	16895	579046	30830	2270	771	AeAeg_experiment_20190320			1015622	AeAeg_Aag2_Qmatrix_rep1	0.0184803	0.181905	0.161849	0.0176414	0.0166351	0.570139	0.0303558	0.00223508	0.000759141
AeAeg_Aag2-TC-Dmem	32638239	0.94	59111	218684	372539	11183	83432	1017610	167763	75822	13441	AeAeg_sRNA_20190530			2019585	AeAeg_Aag2-TC-Dmem	0.0292689	0.108282	0.184463	0.00553728	0.0413115	0.503871	0.0830681	0.0375434	0.00665533
AeAeg_Aag2-TC-M3	14690995	0.95	25677	213347	190666	4942	40442	848522	135975	89052	10382	AeAeg_sRNA_20190530			1559005	AeAeg_Aag2-TC-M3	0.0164701	0.136848	0.1223	0.00316997	0.0259409	0.544272	0.0872191	0.057121	0.00665938
AeAeg_Aag2_NL-M3	21751143	0.95	119136	181844	328004	22078	75453	910586	157308	52041	6358	AeAeg_sRNA_20190530			1852808	AeAeg_Aag2_NL-M3	0.0643002	0.0981451	0.177031	0.011916	0.0407236	0.491463	0.0849025	0.0280876	0.00343155
AeAeg_Aag2_NL_Dmem	7484881	0.96	13955	165279	90798	3617	24777	674468	82533	88733	11198	AeAeg_sRNA_20190530			1155358	AeAeg_Aag2_NL_Dmem	0.0120785	0.143054	0.0785886	0.00313063	0.0214453	0.583774	0.071435	0.0768013	0.00969223
AeAeg_Fcarc_GH_rep2	26837960	0.96	20676	373925	456738	351	15118	267035	9516	502877	172757	AeAeg_sRNA_20190530			1818993	AeAeg_Fcarc_GH_rep2	0.0113667	0.205567	0.251094	0.000192964	0.00831119	0.146804	0.00523147	0.276459	0.094974
AeAeg_Fcarc_GH_rep3	20555802	0.97	13758	346492	423471	277	12143	270803	10517	475164	148666	AeAeg_sRNA_20190530			1701291	AeAeg_Fcarc_GH_rep3	0.0080868	0.203664	0.248912	0.000162818	0.00713752	0.159175	0.00618178	0.279296	0.0873842
AeAeg_Male_Whole	7065226	0.84	621000	208765	124932	323	29973	153865	40180	167780	16241	AeAeg_sRNAs_Tu_lab_SRP034669			1363059	AeAeg_Male_Whole	0.455593	0.153159	0.0916556	0.000236967	0.0219895	0.112882	0.0294778	0.123091	0.0119151
AeAeg_Female_Whole	15183145	0.95	207612	250025	426586	175	34824	402905	79032	245392	60199	AeAeg_sRNAs_Tu_lab_SRP034669			1706750	AeAeg_Female_Whole	0.121642	0.146492	0.249941	0.000102534	0.0204037	0.236066	0.0463056	0.143777	0.0352711
AeAeg_Embryo_0-1h_ZT	3854195	0.87	56426	193335	704930	194	267865	778952	217178	44911	8165	AeAeg_sRNAs_Tu_lab_SRP034669			2271956	AeAeg_Embryo_0-1h_ZT	0.0248359	0.0850963	0.310274	8.5389e-05	0.117901	0.342855	0.0955908	0.0197675	0.00359382
AeAeg_Embryo_2-4h_ZT	4658807	0.54	70880	32370	1537948	10	90694	313278	61807	1325	1106	AeAeg_sRNAs_Tu_lab_SRP034669			2109418	AeAeg_Embryo_2-4h_ZT	0.0336017	0.0153455	0.729086	4.74064e-06	0.0429948	0.148514	0.0293005	0.000628135	0.000524315
AeAeg_Embryo_8-12h	3942989	0.89	297818	264307	458537	355	82823	344731	82874	43031	3563	AeAeg_sRNAs_Tu_lab_SRP034669			1578039	AeAeg_Embryo_8-12h	0.188727	0.167491	0.290574	0.000224963	0.0524848	0.218455	0.0525171	0.0272687	0.00225787
AeAeg_Embryo_12-48h	2621067	0.64	23000	212912	945748	74	24148	209656	40239	20358	7662	AeAeg_sRNAs_Tu_lab_SRP034669			1483797	AeAeg_Embryo_12-48h	0.0155008	0.143491	0.637384	4.98721e-05	0.0162745	0.141297	0.0271189	0.0137202	0.00516378
AeAeg_Larvae_ZT	4477302	0.97	136073	292541	77496	97	22494	736421	29622	125935	9966	AeAeg_sRNAs_Tu_lab_SRP034669			1430645	AeAeg_Larvae_ZT	0.095113	0.204482	0.0541686	6.78016e-05	0.015723	0.514748	0.0207053	0.0880267	0.00696609
AeAeg_Pupae_ZT	3872560	0.85	7921	343643	262049	11	3799	220370	23932	55556	12141	AeAeg_sRNAs_Tu_lab_SRP034669			929422	AeAeg_Pupae_ZT	0.0085225	0.369738	0.281948	1.18353e-05	0.00408749	0.237104	0.0257493	0.0597748	0.013063
AeAeg_Female_Ovary_FJ	4051468	0.92	26890	230008	777649	3442	170413	937142	289230	5067	1348	AeAeg_sRNAs_Jiggins_lab_PRJNA386859			2441189	AeAeg_Female_Ovary_FJ	0.0110151	0.0942197	0.318553	0.00140997	0.0698074	0.383888	0.118479	0.00207563	0.00055219
AeAeg_Female_Soma_FJ	20576779	0.89	244322	274642	494104	8995	69323	1028560	216009	28953	7793	AeAeg_sRNAs_Jiggins_lab_PRJNA386859			2372701	AeAeg_Female_Soma_FJ	0.102972	0.115751	0.208245	0.00379104	0.0292169	0.433498	0.0910393	0.0122025	0.00328444
AeAeg_Female_Ovary_FJ_BetaE	41615426	0.93	4865	197962	806592	3549	172230	982966	346341	3039	985	AeAeg_sRNAs_Jiggins_lab_PRJNA386859			2518529	AeAeg_Female_Ovary_FJ_BetaE	0.00193168	0.0786022	0.320263	0.00140916	0.0683852	0.390294	0.137517	0.00120666	0.000391101
AeAeg_Female_Soma_FJ_BetaE	15750477	0.85	27923	440802	618610	14630	106027	1472680	306474	11307	1299	AeAeg_sRNAs_Jiggins_lab_PRJNA386859			2999752	AeAeg_Female_Soma_FJ_BetaE	0.00930844	0.146946	0.20622	0.00487707	0.0353453	0.490934	0.102166	0.00376931	0.000433036
AaAeg_whole_SINV_YFVcapsid	148193173	0.97	192619	277438	490719	21140	86687	389002	149801	97185	23904	AeAeg_sRNAs_Myles_lab_SRP073949			1728495	AaAeg_whole_SINV_YFVcapsid	0.111437	0.160508	0.2839	0.0122303	0.0501517	0.225052	0.0866656	0.0562252	0.0138294
AaAeg_whole_SINV_NtfCtrl	72566227	0.95	215195	309402	465557	16972	82482	367426	133630	99863	21539	AeAeg_sRNAs_Myles_lab_SRP073949			1712066	AaAeg_whole_SINV_NtfCtrl	0.125693	0.180719	0.271927	0.00991317	0.0481769	0.21461	0.0780519	0.0583289	0.0125807
AeAeg_Whole_ZIKV_D2	54689877	0.96	104397	188039	417479	1251	28367	956300	90742	56960	20702	AeAeg_sRNAs_Hughes_lab_GSE97523			1864237	AeAeg_Whole_ZIKV_D2	0.0559999	0.100866	0.223941	0.000671052	0.0152164	0.512971	0.0486751	0.0305541	0.0111048
AeAeg_Whole_Mock_D2	59457892	0.97	142784	232717	364012	1574	56659	1039770	99740	55902	18434	AeAeg_sRNAs_Hughes_lab_GSE97523			2011592	AeAeg_Whole_Mock_D2	0.0709806	0.115688	0.180957	0.000782465	0.0281662	0.516889	0.0495826	0.0277899	0.00916389
AeAeg_Whole_ZIKV_D7	63144413	0.96	149495	190512	413169	1679	29717	999746	114384	41031	15063	AeAeg_sRNAs_Hughes_lab_GSE97523			1954796	AeAeg_Whole_ZIKV_D7	0.076476	0.0974588	0.211362	0.000858913	0.0152021	0.511432	0.0585145	0.0209899	0.00770566
AeAeg_Whole_Mock_D7	59913766	0.97	101250	207953	390316	1743	26850	833898	78415	92329	30444	AeAeg_sRNAs_Hughes_lab_GSE97523			1763198	AeAeg_Whole_Mock_D7	0.0574241	0.117941	0.221368	0.000988545	0.015228	0.472946	0.0444732	0.0523645	0.0172664
AeAeg_Whole_ZIKV_D14	84319266	0.97	118246	209881	367041	1332	28913	952354	73636	81001	23097	AeAeg_sRNAs_Hughes_lab_GSE97523			1855501	AeAeg_Whole_ZIKV_D14	0.0637273	0.113113	0.197812	0.000717865	0.0155823	0.51326	0.0396852	0.0436545	0.0124479
AeAeg_Whole_Mock_D14	45494043	0.96	117912	219146	425633	1400	30938	993967	86003	77357	26443	AeAeg_sRNAs_Hughes_lab_GSE97523			1978799	AeAeg_Whole_Mock_D14	0.0595877	0.110747	0.215097	0.0007075	0.0156347	0.502308	0.0434622	0.0390929	0.0133632
AeAeg_WholeBody_CHIKV	4942775	0.88	415514	102765	599198	3640	105805	417903	127846	82648	12704	AeAeg_sRNAs_Myles_lab_SRP008316			1868023	AeAeg_WholeBody_CHIKV	0.222435	0.0550127	0.320766	0.00194858	0.0566401	0.223714	0.0684392	0.0442436	0.00680077
AeAeg_CCL-125cells_CHIKV	19981018	0.94	224134	250071	538537	42164	211705	607275	230198	24165	2043	AeAeg_sRNAs_Myles_lab_SRP008316			2130292	AeAeg_CCL-125cells_CHIKV	0.105213	0.117388	0.2528	0.0197926	0.0993784	0.285067	0.108059	0.0113435	0.000959023
AeAeg_Aag2cells_CHIKV	6951199	0.83	66320	305710	734518	60400	191253	1086480	248204	19334	2785	AeAeg_sRNAs_Myles_lab_SRP008316			2715004	AeAeg_Aag2cells_CHIKV	0.0244272	0.1126	0.27054	0.0222467	0.070443	0.400176	0.0914194	0.00712117	0.00102578
AeAeg_Aag2NT	50373975	0.96	237978	171788	590379	45491	171347	759139	283303	23459	3908	AeAeg_sRNAs_VanRij_lab_SRA303329			2286792	AeAeg_Aag2NT	0.104066	0.0751218	0.258169	0.0198929	0.074929	0.331967	0.123887	0.0102585	0.00170894
AeAeg_Aag2DENV2NGC	38844751	0.96	226692	216439	539667	51556	174186	791604	260737	33984	5273	AeAeg_sRNAs_VanRij_lab_SRA303329			2300138	AeAeg_Aag2DENV2NGC	0.0985558	0.0940983	0.234624	0.0224143	0.0757285	0.344155	0.113357	0.0147748	0.00229247
AeAeg_Aag2-SINV-GFP	30035679	0.97	745911	102907	174398	33069	41744	143487	51572	27429	9460	AeAeg_sRNAs_VanRij_lab_SRA303329			1329977	AeAeg_Aag2-SINV-GFP	0.560845	0.077375	0.131129	0.0248643	0.031387	0.107887	0.0387766	0.0206237	0.0071129
AeAeg_Embryo_0-2h_BH_cat	51969723	0.76	56110	211732	795031	3967	245810	641912	207435	135368	27869	AeAeg_sRNAs_Hay_Lab_PMC3755910			2325234	AeAeg_Embryo_0-2h_BH_cat	0.0241309	0.0910584	0.341914	0.00170606	0.105714	0.276063	0.0892104	0.0582169	0.0119855
AeAeg_Embryo_2-4h_BH_cat	46432174	0.81	16630	184615	852028	5622	264989	766702	213281	122340	22651	AeAeg_sRNAs_Hay_Lab_PMC3755910			2448858	AeAeg_Embryo_2-4h_BH_cat	0.00679092	0.0753882	0.347929	0.00229576	0.108209	0.313086	0.0870941	0.049958	0.00924962
AeAeg_Female_Carcass_BF72h_BH	18155271	0.91	363073	177165	240585	19142	50406	194683	61457	292295	70214	AeAeg_sRNAs_Hay_Lab_PMC3755910			1469020	AeAeg_Female_Carcass_BF72h_BH	0.247153	0.120601	0.163772	0.0130305	0.0343127	0.132526	0.0418354	0.198973	0.0477965
AeAeg_MaleCarcass_BH	25293544	0.84	489702	108096	285981	7722	31370	314760	54298	149672	88624	AeAeg_sRNAs_Hay_Lab_PMC3755910			1530225	AeAeg_MaleCarcass_BH	0.32002	0.0706406	0.186888	0.00504632	0.0205003	0.205695	0.0354837	0.0978105	0.0579157
AeAeg_Ovary_BF24h_cat	43272048	0.86	177717	128040	717109	2092	213099	620271	261760	21428	6497	AeAeg_sRNAs_Hay_Lab_PMC3755910			2148013	AeAeg_Ovary_BF24h_cat	0.0827355	0.0596086	0.333848	0.000973923	0.0992075	0.288765	0.121861	0.00997573	0.00302466
AeAeg_Ovary_BF48h_cat	48544138	0.84	190306	153055	666876	2933	198335	613236	243111	36454	6141	AeAeg_sRNAs_Hay_Lab_PMC3755910			2110447	AeAeg_Ovary_BF48h_cat	0.0901733	0.0725226	0.315988	0.00138975	0.0939777	0.290572	0.115194	0.0172731	0.00290981
AeAeg_Ovary_BF72h_cat	16523214	0.85	216759	128764	648947	1995	184576	594573	267220	41572	8499	AeAeg_sRNAs_Hay_Lab_PMC3755910			2092905	AeAeg_Ovary_BF72h_cat	0.103568	0.0615241	0.31007	0.000953221	0.0881913	0.28409	0.127679	0.0198633	0.00406086
AeAeg_Ovary_NonBF_cat	54863745	0.81	131460	133135	770139	2374	207377	696597	226628	14615	3292	AeAeg_sRNAs_Hay_Lab_PMC3755910			2185617	AeAeg_Ovary_NonBF_cat	0.0601478	0.0609141	0.352367	0.00108619	0.0948826	0.318719	0.103691	0.0066869	0.00150621
AeAeg_Testes_BH	15746131	0.76	76713	118335	596359	5904	142753	579163	163779	110630	33963	AeAeg_sRNAs_Hay_Lab_PMC3755910			1827599	AeAeg_Testes_BH	0.0419747	0.0647489	0.326307	0.00323047	0.0781096	0.316898	0.0896143	0.060533	0.0185834
AeAeg_LVP_pMos3DBhspPBac	11877221	0.58	529109	332969	296809	5273	41671	168199	18737	287648	32060	AeAeg_sRNAs_Atkinson_lab_SRP009254			1712475	AeAeg_LVP_pMos3DBhspPBac	0.308973	0.194437	0.173322	0.00307917	0.0243338	0.0982198	0.0109415	0.167972	0.0187214
AeAeg_ORL	12803595	0.6	566268	319059	237222	5580	37936	157519	18153	312116	29305	AeAeg_sRNAs_Atkinson_lab_SRP009254			1683158	AeAeg_ORL	0.336432	0.18956	0.140939	0.0033152	0.0225386	0.0935854	0.0107851	0.185435	0.0174107
AeAeg_ORL_autoHermes257	12794955	0.44	337509	314234	765078	3170	74338	248026	48899	253452	51027	AeAeg_sRNAs_Atkinson_lab_SRP009254			2095733	AeAeg_ORL_autoHermes257	0.161046	0.14994	0.365065	0.0015126	0.0354711	0.118348	0.0233326	0.120937	0.024348
AeAeg_ORL_pMos3DB2Her_r1	12206188	0.58	293558	250293	1089639	7348	89217	296515	57689	330770	42604	AeAeg_sRNAs_Atkinson_lab_SRP009254			2457633	AeAeg_ORL_pMos3DB2Her_r1	0.119447	0.101843	0.443369	0.00298987	0.036302	0.120651	0.0234734	0.134589	0.0173354
AeAeg_ORL_pMos3DB2Her_r2	13519693	0.45	428855	321563	1394056	3941	63569	196759	24453	265898	36070	AeAeg_sRNAs_Atkinson_lab_SRP009254			2735164	AeAeg_ORL_pMos3DB2Her_r2	0.156793	0.117566	0.509679	0.00144086	0.0232414	0.0719368	0.00894023	0.0972146	0.0131875
AeAeg_ORL_pBac3EB2Mos_r1	8950904	0.67	291773	254589	594588	6653	93462	339194	105127	293520	37782	AeAeg_sRNAs_Atkinson_lab_SRP009254			2016688	AeAeg_ORL_pBac3EB2Mos_r1	0.144679	0.126241	0.294834	0.00329897	0.0463443	0.168194	0.0521285	0.145546	0.0187347
AeAeg_ORL_pBac3EB2Mos_r2	13018852	0.52	418411	361337	463676	4443	69607	231561	14495	294890	38556	AeAeg_sRNAs_Atkinson_lab_SRP009254			1896976	AeAeg_ORL_pBac3EB2Mos_r2	0.220567	0.190481	0.244429	0.00234215	0.0366937	0.122068	0.00764111	0.155453	0.020325
																				Average % of reads targeting transposons:	0.0446904

## Sheet: TableS5_AeAeg_Intergenic_piRCLs
Table S5. Metatable of AeAeg samples and cell lines, and additional tabs of top Genic and Intergenic piRNA clusters. Counts are reads per million.
	Curated_region	Size	Start	Stop	Ovary_BF72h_cat	Testes	Female_Carcass_BF72h	MaleCarcass	Embryo_0-2h_cat	Female_Ovary	Female_Soma	Aag2_cells	CCL-125_cells		Average
1	1:91357351-91366875	9524	91357351	91366875	326.618	481.688	0	0	621.452	721.378	0	0	0		239.015
2	1:91800676-91807975	7299	91800676	91807975	1051.3	587.21	569.232	567.221	58.698	523.806	1911.66	467.863	2482.41		913.267
3	1:125428501-125437275	8774	125428501	125437275	588.473	700.885	6.356	0	1016.14	856.624	0	0	0		352.053
4	1:132058701-132067350	8649	132058701	132067350	318.447	242.017	0	0	557.857	509.337	0	0	0		180.851
5	1:140975226-140993050	17824	140975226	140993050	4023.45	375.625	107.691	127.265	184.034	1288.98	663.971	265.768	494.868		836.85
6	1:141009076-141023550	14474	141009076	141023550	3035.51	965.885	631.384	409.507	221.061	1360.92	1366.45	504.049	863.29		1039.78
7	1:141045601-141052825	7224	141045601	141052825	580.778	186.344	31.096	20.902	35.624	272.583	275.395	114.528	572.759		232.223
8	1:188568801-188576450	7649	188568801	188576450	748.663	513.446	0	0	1155.63	2415.7	0	0	0		537.048
9	1:197572701-197642550	69849	197572701	197642550	401.955	510.082	0	6.018	758.343	1354.86	7.071	0	11.44		338.863
10	1:205103526-205110075	6549	205103526	205110075	522.319	374.072	0	0	815.928	658.291	0	0	0		263.401
11	1:207920126-207959000	38874	207920126	207959000	662.447	364.025	0	0	996.509	993.712	0	0	0		335.188
12	1:227539901-227545650	5749	227539901	227545650	395.922	340.015	0	0	570.563	462.504	0	0	0		196.556
13	1:245093901-245101775	7874	245093901	245101775	75.215	221.735	0	0	420.306	430.806	0	0	0		127.562
14	1:310576201-310591600	15399	310576201	310591600	614.254	707.589	20.199	10.487	671.695	873.418	117.146	26.422	56.368		344.175
15	2:40341201-40354000	12799	40341201	40354000	979.124	960.819	0	0	1707.98	1933.48	0	0	0		620.156
16	2:77602176-77663250	61074	77602176	77663250	1252.17	1130.13	9.358	0	2297.63	2530.5	0	0	0		802.198
17	2:109848551-109856175	7624	109848551	109856175	374.912	336.831	0	0	513.202	741.65	0	0	0		218.511
18	2:113379751-113483725	103974	113379751	113483725	1521.49	1196.39	0	0	2541.58	2266.01	0	0	0		836.165
19	2:116799676-116806425	6749	116799676	116806425	478.279	722.253	6.083	0	1185.5	683.858	0	0	0		341.775
20	2:167741351-167745100	3749	167741351	167745100	1017.65	637.733	0	0	1429.35	700.019	0	0	0		420.528
21	2:167861276-167866925	5649	167861276	167866925	244.492	359.798	0	0	572.64	588.526	0	0	0		196.162
22	2:191132901-191152850	19949	191132901	191152850	292.946	456.075	0	0	537.898	465.062	0	0	0		194.665
23	2:208065451-208074175	8724	208065451	208074175	566.121	814.803	0	0	1011.51	1477.06	0	0	0		429.944
24	2:249837651-249913350	75699	249837651	249913350	677.692	648.502	0	0	1349.9	1626.73	5.048	0	0		478.652
25	2:273319376-273325325	5949	273319376	273325325	583.273	478.898	0	0	850.415	536.466	0	0	0		272.117
26	2:297680401-297697875	17474	297680401	297697875	268.748	377.41	10.684	0	947.237	720.568	0	0	0		258.294
27	2:297755276-297774100	18824	297755276	297774100	398.562	387.497	0	0	942.063	1376.88	0	0	0		345
28	2:300835469-300860243	24774	300835469	300860243	1141.52	1490.67	31.183	0	2492.23	1245.19	0	0	0		711.199
29	2:339953476-340065125	111649	339953476	340065125	862.909	647.133	5.768	0	2026.11	2118.28	0	0	0		628.911
30	2:461213251-461272650	59399	461213251	461272650	5393.07	4540.75	2041.21	2801.2	223.034	6376.83	24096.8	8899.54	8792.46		7018.32
31	2:461242151-461270400	28249	461242151	461270400	3612.77	3047.54	980.62	1700.14	187.488	4829.14	24004.8	8781.18	8596.43		6193.35
32	2:461257926-461270850	12924	461257926	461270850	2991.03	2358.96	856.195	1414.01	138.806	3692.66	10699.1	5259.1	6001.21		3712.35
33	2:461279151-461296200	17049	461279151	461296200	2535.45	2369.25	602.118	836.699	208.873	2351.83	4216.68	4043.48	3119.45		2253.76
34	2:469193476-469200525	7049	469193476	469200525	1064.64	719.187	254.877	308.21	38.449	378.621	2321.74	585.451	1010.25		742.38
35	2:469226851-469242100	15249	469226851	469242100	980.906	1043.9	1644.58	211.777	34.592	577.544	1286.3	1297.88	550.151		847.514
36	2:469268651-469270225	1574	469268651	469270225	656.572	377.153	294.158	266.703	29.745	359.902	1228.01	873.654	1299.32		598.358
37	2:461281076-461295700	14624	461281076	461295700	2382.84	2182.43	575.224	794.6	153.404	2351.83	4216.68	3750.42	2696.99		2122.71
38	3:105760526-105769950	9424	105760526	105769950	1888.46	913.311	276.641	200.407	26.963	598.836	326.395	179.184	241.08		516.808
39	3:105797001-105839475	42474	105797001	105839475	3947.52	965.645	342.515	307.211	154.151	1302.41	1632.66	560.89	1499.29		1190.25
40	3:105951451-105984175	32724	105951451	105984175	3734.78	1621.88	1759.18	3529.63	67.953	3717.15	14891.1	5698.81	6770.68		4643.46
41	3:106033276-106088700	55424	106033276	106088700	6076.02	4861.29	6144.39	6372.13	416.747	6712.01	12274.8	5334.72	19987.1		7575.47
42	3:159011651-159031375	19724	159011651	159031375	874.959	946.746	15.186	5.443	1745.14	2169.88	12.022	7.308	10.751		643.048
43	3:229514551-229521350	6799	229514551	229521350	384.196	527.673	0	0	733.424	340.919	0	0	0		220.69
44	3:261710276-261712225	1949	261710276	261712225	1022.72	515.555	0	0	974.505	654.991	0	0	0		351.974
45	3:261760876-261806675	45799	261760876	261806675	888.726	754.008	0	0	1502.95	1326.84	0	0	0		496.946
46	3:275405126-275440025	34899	275405126	275440025	2038.16	2871.47	690.93	520.544	143.44	1575.42	2505.31	3411.76	2571.45		1814.28
47	3:313434651-313463850	29199	313434651	313463850	3071.09	1376.01	1954.18	2123.57	332.563	2283.61	8587.11	3906.35	2256.7		2876.8
48	3:314097926-314109600	11674	314097926	314109600	2312.1	1082.06	1605.5	2487.52	83.197	1609.71	9990.9	3891.03	2672.72		2859.41
49	3:314137001-314142150	5149	314137001	314142150	953.093	595.359	698.588	0	18.817	0	0	0	0		251.762
50	3:314144401-314148550	4149	314144401	314148550	957.353	604.616	5080.73	1348.47	87.836	657.064	0	1863.82	1680.96		1364.54
51	3:314186951-314215050	28099	314186951	314215050	6328.39	3830.96	10593.4	8043.69	391.859	5544.15	30326.5	8255.41	11822.2		9459.63
52	3:340830201-340838425	8224	340830201	340838425	1245.44	705.929	0	0	1481.42	830.879	0	0	0		473.741
53	3:342067451-342132925	65474	342067451	342132925	869.752	613.645	0	0	1149.25	380.14	0	0	0		334.754
54	3:342206601-342221625	15024	342206601	342221625	1062.84	876.558	28.577	0	1970.62	852.469	0	0	0		532.341
55	3:344846926-344850050	3124	344846926	344850050	7363.87	31.042	0	253.078	11626.5	5829.87	179.725	222.172	90.518		2844.08

## Sheet: TableS5_AeAeg_Genic_piRCL
Table S5. Metatable of AeAeg samples and cell lines, and additional tabs of top Genic and Intergenic piRNA clusters. Counts are reads per million.
	Gene	Locus	Ovary_BF72h_cat	Testes	Female_Carcass_BF72h	MaleCarcass	Embryo_0-2h_cat	Female_Ovary	Female_Soma	Aag2_cells	CCL-125_cells		Average
1	AAEL000010-RA	3:102915802-102917104	0.334	3.705	2.846	0.995	1.293	0.14	22.665	143	41.239		24.0241
2	AAEL000301-RA	3:266486515-266488978	41.245	16.706	2.106	0.47	1.357	5.056	3.055	0.734	4.856		8.39833
3	AAEL000428-RA	3:186857865-186870675	116.499	118.994	4.718	1.276	259.574	60.985	1.972	1.032	0.188		62.8042
4	AAEL000441-RA	3:186820575-186834073	103.49	119.064	1.045	0.326	150.934	329.652	1.129	0.365	0.345		78.4833
5	AAEL000492-RB	3:161215464-161216365	12.8	1.693	0.826	1.206	6.652	5.337	1.532	32.542	35.77		10.9287
6	AAEL000501-RB	3:161200238-161200925	44.828	63.064	17.268	9.179	5.612	7.397	4.095	1081.4	13.422		138.473
7	AAEL000517-RB	3:161214209-161215549	36.277	69.209	18.731	9.539	8.564	14.203	5.158	1193.42	13.949		152.117
8	AAEL000518-RB	3:161216938-161217433	1.263	1.339	0.526	0.24	2.591	1.662	0.708	57.203	2.193		7.525
9	AAEL000668-RA	3:395376845-395378822	0	0.494	1.482	0.306	0.021	0	84.681	0.661	1.254		9.87767
10	AAEL000732-RA	2:54757031-54759269	43.514	20.895	0.88	0.517	37.989	36.515	2.211	0.013	0.035		15.841
11	AAEL000801-RA	3:119817249-119819283	194.813	32.473	0.702	0.136	100.764	79.209	0.194	0.102	0.033		45.3807
12	AAEL000805-RA	3:363951497-363995828	4.388	29.858	2.905	3.363	10.924	648.38	1959.71	63.536	5.046		303.123
13	AAEL000997-RB	1:210557171-210558801	75.179	52.831	6.415	2.867	41.158	35.303	16.613	121.152	95.468		49.6651
14	AAEL001105-RE	3:1421437-1422669	32.035	0.082	0.039	0.094	0.15	0	0.175	0.321	0.062		3.662
15	AAEL001216-RA	2:413303055-413308393	0.667	5.796	5.311	1.137	2.933	16.01	34.83	24.079	97.021		20.8649
16	AAEL001246-RA	2:151942150-151943139	13.615	5.429	0.468	0	0.37	3.09	0.291	13.978	47.407		9.40533
17	AAEL001359-RA	2:204897188-204970284	2753.91	878.611	644.154	285.054	160.078	865.307	1403.77	616.407	1788.29		1043.95
18	AAEL001401-RA	2:48276920-48278507	0	1.316	2.106	0.235	0.192	903.958	2839.53	0.058	0.069		416.384
19	AAEL001645-RA	2:300422116-300449925	242.099	130.003	38.55	20.365	118.766	207.484	66.278	39.179	464.204		147.436
20	AAEL001759-RA	2:165793306-165797554	5.343	27.064	32.246	26.983	5.611	7.865	53.539	89.772	41.788		32.2457
21	AAEL002401-RA	2:302264481-302266660	0.007	1.193	0.394	0.141	0.833	6.179	2.977	2.011	38.425		5.79556
22	AAEL002483-RA	2:77878532-77888714	225.436	163.217	232.01	495.636	49.932	45.854	342.862	5.869	5.379		174.022
23	AAEL002534-RA	1:89339917-89343203	0.1	5.38	5.244	4.708	3.639	4.915	28.622	61.092	34.759		16.4954
24	AAEL002832-RA	3:235222619-235225133	37.307	7.169	7.642	3.666	2.191	5.337	32.51	244.534	44.083		42.7154
25	AAEL003235-RB	2:366397239-366398364	0	0.672	40.655	1.653	0	0	4.597	0	0		5.28633
26	AAEL003266-RA	2:366431501-366432574	0	0	0	0.002	0	0	30.087	0.017	0.035		3.349
27	AAEL003385-RA	3:81352815-81354356	0	1.124	0.39	0.494	0.398	2.528	0.763	0.752	33.744		4.46589
28	AAEL003526-RA	3:264026529-264031783	0.011	0.913	0.418	0.35	0.324	16.211	85.565	0.629	0.199		11.6244
29	AAEL003673-RB	2:316711844-316712283	4.561	0.082	0.104	0.016	26.484	2.762	0.048	0.547	0.01		3.846
30	AAEL003689-RB	2:316692872-316693312	4.561	0.082	0.104	0.016	23.87	1.779	0.107	0.147	0		3.40733
31	AAEL004017-RA	3:166158988-166177124	2.279	2.989	0.786	0.204	1.907	8.053	2.555	2.001	446.387		51.9068
32	AAEL004334-RA	3:365757763-365758364	18.086	1.81	11.307	3.901	0.235	0.281	9.084	6.562	3.79		6.11733
33	AAEL004500-RD	2:453152130-453160391	21.023	64.606	37.337	27.868	14.715	16.039	116.462	56.944	180.09		59.4538
34	AAEL004705-RA	1:118141240-118160414	140.474	48.609	13.798	6.598	4.563	88.514	41.076	60.504	300.598		78.3038
35	AAEL004744-RA	2:288714191-288715268	18.22	0.165	0.039	0	0.021	0.281	0.058	0.082	0.087		2.10589
36	AAEL005192-RA	2:113794679-113795271	6.674	0.082	0.078	0	0.064	21.956	0	0.006	0		3.20667
37	AAEL005237-RB	3:90551996-90553174	13.949	28.926	1.014	0.282	7.094	23.875	0.466	0.127	0.637		8.48556
38	AAEL005277-RC	2:69318536-69338175	2866.81	1959.92	1837.33	911.008	203.098	124.585	210.4	119.787	399.672		959.178
39	AAEL005567-RD	3:41296-44994	81.756	9.817	6.91	0.836	31.693	117.457	7.388	0.051	9.773		29.5201
40	AAEL005722-RB	1:123755912-123757697	0	10.468	11.229	8.601	4.15	14.044	80.483	38.322	449.036		68.4814
41	AAEL006115-RA	3:259776930-259777947	0.067	2.221	3.587	0.752	0.438	0.843	23.22	0.652	11.177		4.773
42	AAEL006259-RA	3:63253673-63255165	0	45.615	24.447	40.867	0.103	0	4.559	0.141	0.09		12.8691
43	AAEL006483-RB	3:15917713-15918754	0	0.576	0.167	0.893	27.504	3.09	0.116	0.022	0		3.59644
44	AAEL006507-RA	2:467779013-467780183	27.096	0.576	0	0.188	0.003	0	0.698	0.12	0.433		3.23489
45	AAEL006642-RA	3:148473565-148476084	14.583	15.918	40.77	29.344	21.834	6.46	52.065	16.005	60.588		28.6186
46	AAEL006704-RA	3:353440794-353442177	4.872	6.334	37.119	477.108	0.759	0.281	59.368	0.087	0.017		65.105
47	AAEL006887-RA	2:25615422-25616585	1.212	10.624	2.496	0.322	0.784	3.666	0.726	1.26	17.878		4.32978
48	AAEL007005-RA	3:171356252-171356637	1.196	2.518	1.423	0.381	3.327	2.926	1.057	92.877	4.133		12.2042
49	AAEL007441-RA	2:291354858-291356067	24.894	1.234	0.396	0.566	0.738	3.932	3.783	2.142	6.405		4.89889
50	AAEL007573-RA	2:343916191-343918003	52.524	0.576	0.094	0.19	0.497	0	0	0.89	3.194		6.44056
51	AAEL007686-RA	2:251232949-251234102	170.92	19.277	1.264	0.141	1.861	14.044	0.524	0.084	9.695		24.2011
52	AAEL007776-RA	3:133760712-133761732	64.671	30.259	1.365	3.196	67.41	57.581	3.23	0.048	0.03		25.31
53	AAEL007844-RB	2:461274177-461278626	143.202	284.476	72.9	90.125	6.818	485.041	542.14	513.031	1320.39		384.236
54	AAEL008188-RA	3:53615259-53616297	16.151	11.681	13.686	4.891	3.647	1.445	21.765	4.64	20.134		10.8933
55	AAEL008451-RA	1:171397315-171398914	171.855	39.321	1.326	0.259	185.707	2.247	0.058	0.03	0.017		44.5356
56	AAEL008770-RA	2:198810540-198811569	22.024	5.351	0.468	0.47	0.624	2.528	0.582	0.522	1.696		3.80722
57	AAEL008989-RA	2:178401418-178401905	0	0.247	0.039	0	0.374	11.118	85.648	0.022	0.003		10.8279
58	AAEL009042-RC	3:46103104-46105247	37.508	1.645	2.183	2.648	1.376	1.124	2.626	8.814	9.342		7.474
59	AAEL009160-RD	1:112344650-112345807	0.267	1.851	3.431	0.823	3.572	3.651	3.608	1.686	36.326		6.135
60	AAEL009464-RA	1:56476137-56477554	57.513	0.329	0	0	0.268	0	0	0.054	0.036		6.46667
61	AAEL009506-RA	3:344888374-344890864	0.133	5.758	5.615	3.478	2.556	1.124	33.433	21.678	38.023		12.422
62	AAEL009524-RA	3:97653072-97655090	0	3.537	3.295	6.486	0.082	0	30.135	1.245	0.043		4.98033
63	AAEL009873-RB	1:91833716-91835191	603.35	494.447	347.917	187.531	8.165	226.501	452.341	237.034	3908.09		718.375
64	AAEL010118-RA	2:224747879-224749762	2.241	6.585	1.103	0.294	0.727	1.124	0.64	2.02	40.3		6.11489
65	AAEL010168-RA	3:149352728-149354362	95.638	35.908	26.358	7.097	4.932	7.593	31.221	115.385	66.946		43.4531
66	AAEL010299-RD	3:409278854-409281455	0.002	4.207	4.801	2.654	1.721	3.371	15.037	2.12	45.25		8.79589
67	AAEL010821-RA	3:52048898-52050777	2.136	9.529	65.96	7.064	3.006	2.668	31.262	23.625	62.043		23.0326
68	AAEL010872-RA	3:318912537-318913444	13.815	0	0	0	11.923	0.281	0	0.004	0.017		2.89333
69	AAEL010884-RB	1:218023823-218029661	0	6.777	4.293	5.254	0.24	3.011	101.564	0.224	0.116		13.4977
70	AAEL011202-RB	1:3530231-3531719	0.334	1.892	4.211	2.068	0.715	4.213	43.122	5.952	57.931		13.382
71	AAEL011424-RA	3:329055243-329056181	0	0.514	0.448	0.66	9.324	4.775	0.291	0.319	37.823		6.01711
72	AAEL011627-RA	3:281587120-281588230	9.499	0.987	1.201	0.564	5.021	3.651	22.638	1.23	2.198		5.221
73	AAEL011656-RA	3:21835503-21836164	0	6.211	5.888	2.891	4.163	0.562	17.409	23.451	15.04		8.40167
74	AAEL011801-RA	3:36343179-36345676	61.2	55.404	1.248	0.235	13.624	51.009	0.116	0.809	7.938		21.287
75	AAEL011877-RB	2:187319931-187323883	0.044	0.304	0.269	0.039	0.135	0.585	0.204	0.53	65.268		7.48644
76	AAEL012629-RA	2:294849823-294850551	1.034	15.523	0.689	0.118	0.566	0.843	0.145	0.098	0.9		2.21289
77	AAEL012641-RA	3:283865033-283865724	165.514	192.206	6.628	0.705	341.085	69.659	0.116	0.084	0.006		86.2226
78	AAEL012642-RA	3:283923546-283924722	18.42	6.581	0.156	0	13.375	4.494	0.058	0.025	0.035		4.79378
79	AAEL012681-RA	3:23880596-23881485	0.067	1.748	1.404	0.564	0.208	14.325	19.117	8.145	82.722		14.2556
80	AAEL012932-RA	2:302157009-302159174	0.4	0.946	0.78	1.367	2.122	24.999	928.617	127.282	56.822		127.037
81	AAEL013014-RA	2:334491425-334503431	426.265	117.111	205.318	80.699	25.876	9.238	16.059	10.95	26.451		101.996
82	AAEL013027-RA	2:330380959-330381532	148.93	0.202	7.664	0.063	0.669	0	0.017	0.03	0.052		17.5141
83	AAEL013032-RC	3:208625787-208628374	47.728	2.221	0.468	0.141	26.359	3.09	1.455	0.029	0.598		9.121
84	AAEL013069-RA	2:253472666-253479077	8.075	11.537	12.326	13.462	4.357	3.827	34.034	16.057	239.679		38.1504
85	AAEL013221-RD	3:341031078-341032478	32.569	12.075	16.007	4.171	4.554	4.775	24.413	6.902	18.705		13.7968
86	AAEL013236-RA	3:280060456-280062163	0	1.124	0.241	0.251	1.994	0.843	1.096	0.873	25.899		3.59122
87	AAEL013352-RA	2:135705862-135706920	0	0	0.117	0	0.053	0	0.061	35.24	0.156		3.95856
88	AAEL013981-RA	3:230649177-230651544	0	29.517	2.142	18.045	0.205	0	72.278	0.06	0.294		13.6157
89	AAEL014454-RA	2:118901505-118902419	17.553	0.082	0	0	0.021	0	0	0.08	0.217		1.99478
90	AAEL014571-RB	1:199365713-199367201	93.636	22.835	0.819	0.094	87.259	45.222	0.233	0.042	0		27.7933
91	AAEL014770-RA	2:178108381-178109085	6.187	11.307	0.156	0.024	21.302	0.169	0.041	0.02	0.022		4.35867
92	AAEL014895-RA	3:290867443-290870918	1.268	1.152	0.468	0.49	0.405	0.843	0.524	17.008	56.382		8.72667
93	AAEL015006-RB	2:337786517-337787586	6.696	5.758	6.473	3.431	1.659	4.775	27.497	99.176	13.229		18.7438
94	AAEL015527-RA	2:162899059-162901801	147.027	76.079	0.26	0.522	58.762	13.482	5.001	0.131	0.026		33.4767
95	AAEL015571-RB	1:71294113-71296148	32.769	78.684	0.468	0.282	76.849	25.28	0.233	0.341	0.26		23.9073
96	AAEL016000-RA	3:101837120-101837201	0.022	0.911	4.631	1.537	0.052	3.53	39.693	2.28	7.944		6.73333
97	AAEL016002-RA	3:101832322-101832403	0.017	0.882	0.37	0.64	0.389	0.281	5.646	0.601	11.783		2.28989
98	AAEL016009-RA	3:101435230-101435311	0.1	0.792	0.597	1.073	0.341	0.674	15.802	1.524	2.63		2.61478
99	AAEL016010-RA	3:101435023-101435105	0.08	0.132	0.094	0.075	0.088	0.281	0.516	0.467	42.825		4.95089
100	AAEL016011-RA	3:101424429-101424510	24.727	9.831	49.889	46.515	3.531	6.828	167.049	25.541	35.807		41.0798
101	AAEL016032-RA	2:74808612-74808695	0.042	0.032	0.093	0.027	0.028	0	1.2	100.362	7.57		12.1504
102	AAEL016039-RA	3:400699676-400699758	0	0.436	2.145	0.926	0.999	1.685	4.685	72.469	5.816		9.90678
103	AAEL016062-RA	3:243881769-243881861	1.115	8.697	31.787	53.14	16.75	0.281	1.847	18.417	4.512		15.1718
104	AAEL016071-RA	3:120459142-120459234	0	0.576	0.624	0.306	0.091	0	1.001	24.386	2.024		3.22311
105	AAEL016072-RA	3:120458016-120458108	0	2.139	0.78	0.611	0	0	0.378	16.389	0.562		2.31767
106	AAEL016125-RA	2:48071243-48071326	0	150.619	1.594	1.368	0.735	0.404	3.284	0.24	0.458		17.6336
107	AAEL016178-RA	1:243310464-243310547	0	0.311	0.918	0.123	0.04	0	4.492	225.903	7.82		26.623
108	AAEL016179-RA	1:243517208-243517291	0	0.332	0.06	0.056	0.062	0.562	3.918	12.461	0.552		2.00033
109	AAEL016207-RA	2:77918745-77918828	0	0.208	0.236	0.166	0.03	0.375	17.823	16.001	5.314		4.46144
110	AAEL016214-RA	1:226365719-226365802	0.067	0.692	0.676	1.535	0.424	0	1.956	0.696	23.899		3.32722
111	AAEL016217-RA	1:226328297-226328380	0.067	0.692	0.598	1.545	0.402	0	0.622	0.214	20.576		2.74622
112	AAEL016249-RA	2:433626878-433626961	0	3.595	5.615	0.752	0.064	1.404	2.464	124.446	11.497		16.6486
113	AAEL016253-RA	2:433936883-433936965	0	0.247	0.799	0.306	0.157	1.124	3.104	35.54	5.347		5.18044
114	AAEL016254-RA	2:433937718-433937802	20.689	0.905	1.053	0.141	0.548	0	0	1.279	4.766		3.26456
115	AAEL016276-RA	1:208392745-208392827	0	0.041	0.133	0.009	0.132	0	0.087	1.229	10.436		1.34078
116	AAEL016315-RA	2:195974462-195974545	0	2.043	1.352	0.752	0.064	0.281	4.927	101.457	7.485		13.1512
117	AAEL016353-RA	3:273932034-273932117	0	1.042	6.434	2.421	0.856	0.187	1.48	0.494	216.25		25.4627
118	AAEL016395-RA	2:436972236-436972318	0.228	1.774	0.692	0.892	0.545	0	1.26	0.12	18.047		2.61756
119	AAEL016525-RA	3:100830928-100831010	0	0.016	0.011	0.103	0.035	0	0.205	0.032	38.802		4.356
120	AAEL016527-RA	3:100845288-100845370	0	0.016	0	0.009	0.043	0	0.295	0.592	38.896		4.42789
121	AAEL016529-RA	3:100848897-100848980	0	0.439	0.189	0.016	0.014	0.375	16.529	1.005	3.16		2.41411
122	AAEL016530-RA	3:100927307-100927399	0	0.082	0.312	0.024	0	0	0.291	18.718	0.225		2.18356
123	AAEL016601-RA	3:78980987-78981069	0	2.468	0.936	3.008	0.007	0	1.955	10.378	3.643		2.48833
124	AAEL016602-RA	3:78980294-78980377	0	2.269	7.077	2.84	0.858	0.468	10.989	13.154	172.983		23.4042
125	AAEL016612-RA	3:78516674-78516766	0	2.797	7.406	2.938	0.002	1.124	0.573	17.025	0.156		3.55789
126	AAEL016620-RA	3:78237001-78237083	0	0.016	0	0.025	0.048	0	0.219	0.38	38.806		4.38822
127	AAEL016626-RA	2:5350436-5350518	0	1.089	6.706	1.083	0.053	2.949	25.554	0.679	3.593		4.634
128	AAEL016629-RA	2:5403001-5403083	0	0.047	1.75	0.154	0	2.575	14.66	0.373	3.552		2.56789
129	AAEL016687-RA	1:219000641-219000723	0	0.411	0.393	0.264	0.123	1.124	0.296	1.184	15.379		2.13044
130	AAEL016691-RA	1:219116994-219117077	0	0.987	0.468	1.128	0	0	3.375	17.806	1.687		2.82789
131	AAEL016692-RA	1:219139782-219139864	13.003	7.697	6.888	6.31	18.016	2.622	13.58	6.46	6.402		8.99756
132	AAEL016705-RA	1:222823563-222823645	17.819	3.328	2.547	0.785	0.032	0	0.975	7.133	2.637		3.91733
133	AAEL016874-RA	2:352547630-352547712	0	0.439	1.56	0.529	0.101	0	0.029	2.074	10.647		1.70878
134	AAEL016876-RA	2:352548329-352548411	0	0.439	1.56	0.529	0.101	0	0.029	2.117	10.643		1.71311
135	AAEL016879-RA	2:352555344-352555426	0	0.422	1.56	0.533	0.106	0	0.015	2.053	10.378		1.67411
136	AAEL017096-RA	2:45576551-45580494	80.492	120.805	48.539	18.516	20.238	21.628	111.14	53.483	154.557		69.9331
137	AAEL017385-RE	3:41155405-41196159	631.675	3281.66	2841.03	6318.53	81.438	15384.1	93516.7	106008	116570		38292.5
138	AAEL017398-RA	3:217721635-217723236	11.179	5.1	0	0.094	11.175	75.277	0.186	0.025	0.017		11.4503
139	AAEL017403-RA	2:330255325-330255885	85.26	0	0.312	0	0.198	48.874	0.233	0.025	0.017		14.991
140	AAEL017545-RB	2:343119464-343130131	307.77	41.022	110.157	22.512	232.016	86.043	110.498	130.349	581.917		180.254
141	AAEL018018-RA	3:161195434-161196219	40.265	7.335	8.292	2.092	7.434	4.915	0.897	2.307	3.72		8.58411
142	AAEL018816-RA	1:210070144-210070227	0	0.699	0.611	0.494	2.774	0	2.095	23.385	0.467		3.39167
143	AAEL018914-RA	3:389820071-389820153	0	0.425	0.569	0.32	0.17	0.08	0.411	0.623	11.165		1.52922
144	AAEL018946-RA	3:10696420-10696502	0	1.271	2	0.306	0.201	0.07	2.849	101.629	10.264		13.1767
145	AAEL019403-RA	3:93749065-93753528	26.329	21.878	17.804	10.646	9.814	5.056	56.465	21.473	86.024		28.3877
146	AAEL019529-RI	2:13871310-13889248	9.758	20.23	15.562	28.151	10.709	32.441	176.614	1130.7	261.323		187.276
147	AAEL019600-RA	2:258654370-258657496	67.902	14.656	3.971	2.506	0.922	1.685	1.265	3.785	16.822		12.6127
148	AAEL019698-RA	3:224118476-224146254	117.651	134.137	1.288	0.278	93.677	478.056	2.953	4.282	5.255		93.0641
149	AAEL020035-RE	3:30495547-30497504	0	52.466	0.078	0.289	0.148	0.281	0.029	0.033	0.152		5.94178
150	AAEL020106-RA	1:261318255-261318849	990.216	547.375	247.905	788.561	1452.76	748.838	2287.78	1477.92	1605.49		1127.43
151	AAEL020238-RA	1:62372912-62375527	13.748	6.26	8.235	5.409	4.303	8.427	41.461	58.317	55.614		22.4193
152	AAEL020354-RA	2:238036957-238038376	0.812	6.26	0.486	0.137	1.102	9.964	0.909	0.031	195.57		23.919
153	AAEL020392-RA	3:94094023-94096554	26.37	4.913	3.333	1.493	1.517	13.901	9.8	7.538	86.253		17.2353
154	AAEL020461-RA	2:163452981-163460204	218.187	123.456	40.242	21.305	92.527	199.923	76.26	42.256	770.262		176.046
155	AAEL020572-RA	1:91814751-91816090	3.604	50.591	7.076	15.573	2.073	83.376	188.667	400.696	175.417		103.008
156	AAEL020641-RA	1:37420442-37421228	27.23	16.782	0.078	0.118	6.85	10.674	0.175	0.142	0.026		6.89722
157	AAEL020720-RA	2:334340411-334353623	6.618	19.419	37.095	83.551	18.843	86.14	515.909	2875.64	612.694		472.879
158	AAEL020749-RA	3:310218519-310219980	0	6.046	4.289	9.644	3.741	11.938	115.869	47.647	34.583		25.973
159	AAEL020778-RA	3:388876559-388877951	0	0.497	1.287	0.901	0.481	6.179	48.321	190.99	177.404		47.34
160	AAEL020785-RA	2:242237393-242238269	0.467	4.137	0.234	0.001	2.607	112.419	0.422	0.007	0.042		13.3707
161	AAEL020787-RA	3:149660626-149661726	0	20.356	0	0.018	3.186	2.372	0	0.052	0.02		2.88933
162	AAEL020795-RA	1:141028951-141035026	151.74	86.954	23.884	13.399	55.83	215.415	73.824	22.87	546.93		132.316
163	AAEL020809-RA	2:181452527-181463314	38.933	80.353	2.217	0.421	84.906	288.524	1.877	0.367	1.795		55.4881
164	AAEL020851-RA	2:302185052-302186029	0	3.907	0.317	0.047	32.886	0	0.349	0.535	0.635		4.29733
165	AAEL020888-RA	3:235665216-235665819	2.107	0.102	0	0	0.163	2.22	0.019	113.592	0.004		13.1341
166	AAEL020933-RA	2:346000140-346032728	366.479	260.492	8.955	1.285	600.922	107.623	2.951	1.548	0.847		150.122
167	AAEL021013-RA	3:325767685-325768719	3.775	6.628	5.699	4.397	2.319	21.315	49.963	47.61	46.97		20.964
168	AAEL021088-RA	2:418208761-418223860	98.274	56.545	182.738	46.058	63.724	74.244	700.644	4.69	391.215		179.792
169	AAEL021115-RA	3:342989986-342990738	8.956	21.974	35.129	20.904	1.841	3.509	0.164	0.138	0.183		10.3109
170	AAEL021140-RA	2:193068133-193069136	74.982	8.555	8.039	5.687	2.094	4.775	41.522	29.493	35.421		23.3964
171	AAEL021350-RA	3:161228828-161230294	36.277	69.531	18.731	9.555	8.664	15.561	5.158	1193.52	14		152.333
172	AAEL021374-RA	3:201894635-201897052	14.093	24.178	0.468	0.118	16.729	78.343	0.648	0.074	0.104		14.9728
173	AAEL021458-RA	2:293646155-293647960	9.492	27.054	29.834	8.62	3.393	8.289	0.378	0.32	0.415		9.755
174	AAEL021575-RA	2:469252038-469254917	2.318	3.476	0.688	1.138	2.103	10.214	12.075	84.428	14.954		14.5993
175	AAEL021580-RA	2:356533108-356534989	4.016	67.455	1.014	0.462	17.344	23.969	0.116	0.061	3.881		13.1464
176	AAEL021610-RA	2:461306040-461337284	4224.96	4058.46	1646.06	1611.87	393.162	3226.4	5594.96	5574.18	8072.41		3822.49
177	AAEL021622-RA	3:191404075-191424430	453.884	218.968	109.271	122.156	33.37	438.356	883.45	372.7	519.315		350.163
178	AAEL021683-RA	3:143023555-143024393	26.696	15.836	0.406	0.102	56.018	15.84	0.019	0.003	0.022		12.7713
179	AAEL021886-RA	2:247936396-247938512	0	15.811	36.652	2.444	0	0	0.698	0.035	0.044		6.18711
180	AAEL021930-RA	2:428895906-428896685	0	0.123	0.078	0	0.033	0.468	12.048	0	0.021		1.419
181	AAEL022035-RA	3:299415422-299417145	0.044	0	0.13	0.039	0.12	0	0.019	0.157	61.227		6.85956
182	AAEL022166-RA	2:469154876-469162187	210.486	65.86	54.482	47.843	27.155	110.446	153.92	127.497	260.282		117.552
183	AAEL022245-RA	3:217616562-217618820	159.397	288.554	196.38	1103.28	24.714	199.712	1283.47	930.453	2835.97		780.215
184	AAEL022279-RA	2:373252585-373253828	22.625	37.553	0.468	0.094	33.454	42.554	0.537	0	0.043		15.2587
185	AAEL022331-RA	3:191438347-191439860	88.011	27.58	12.238	6.178	5.739	37.594	41.444	83.478	44.741		38.5559
186	AAEL022388-RA	1:145699434-145700367	0.267	10.057	0.039	0.024	14.049	0.843	0.538	3.265	0.006		3.232
187	AAEL022505-RA	1:28321159-28322992	63.336	5.265	1.991	0.282	0.491	1.404	1.048	4.518	1.501		8.87067
188	AAEL022591-RA	3:201344016-201345352	32.352	20.915	0.481	0.141	8.028	11.774	0.08	0.043	0.117		8.21456
189	AAEL022662-RA	3:314112880-314120022	1643.65	820.882	1113.8	416.929	88.679	421.046	1328.15	916.342	775.375		836.094
190	AAEL022766-RA	3:161200826-161201313	12.8	1.364	0.709	1.175	6.101	4.681	1.3	31.842	35.684		10.6284
191	AAEL022861-RA	1:151753141-151753549	1.292	1.657	0.29	1.253	0.279	10.686	30.147	36.876	37.124		13.2893
192	AAEL022874-RA	2:350735109-350736162	19.248	0.114	0.053	0.047	1.413	3.399	0.038	0.05	0.027		2.70989
193	AAEL022951-RA	1:269189978-269192208	176.882	151.055	2.3	0.235	382.612	1544.95	7.274	0.184	0.022		251.723
194	AAEL022984-RB	3:217679333-217682320	0	0.609	0.078	0.03	0.197	110.945	0.352	0.022	0.099		12.4813
195	AAEL023001-RA	3:314177313-314186379	1414.64	883.379	5353.97	1754.43	122.151	941.395	5159.98	2880.9	2245.49		2306.26
196	AAEL023069-RA	1:23573578-23575600	51.456	2.55	1.092	0.718	2.02	0.562	1.571	1.606	4.373		7.32756
197	AAEL023111-RA	3:205910555-205911399	17.726	22.668	0.097	0.082	28.461	2.144	0.054	0.004	0		7.91511
198	AAEL023126-RA	3:280017948-280019310	0	0.329	0.078	0.047	0.108	9.55	41.58	0.119	0.089		5.76667
199	AAEL023245-RA	2:296421624-296422204	6.328	4.712	0.483	0.059	16.193	3.708	0.016	0.016	0.077		3.51022
200	AAEL023246-RA	3:255425469-255426469	11.012	7.733	0.468	0.047	18.012	3.757	0.007	0.048	0.017		4.56678
201	AAEL023263-RA	1:294411586-294418955	274.497	125.251	40.632	20.847	97.194	197.842	66.128	38.193	630.716		165.7
202	AAEL023292-RA	1:263488519-263490751	281.908	263.569	12.415	1.363	448.521	0.281	0.291	0.02	0.018		112.043
203	AAEL023313-RA	2:245054623-245055613	31.234	42.283	0.546	0.047	91.283	54.512	0.175	0	0.017		24.4552
204	AAEL023343-RA	3:161202253-161202578	1.263	1.778	0.565	0.193	1.917	1.451	0.97	56.561	1.066		7.30711
205	AAEL023394-RA	3:384680441-384680942	31.935	0.672	0.016	0	0.339	0.396	0	0.004	0.035		3.71078
206	AAEL023405-RA	2:293449391-293450337	0.033	7.432	0.143	0.077	22.974	0.562	0	0.02	0		3.47122
207	AAEL023427-RA	3:222080321-222081672	0.295	4.878	0.473	0.109	0.832	9.076	1.125	0.176	856.314		97.0309
208	AAEL023537-RA	2:300800576-300801787	100.933	76.915	3.47	0.282	147.974	516.547	1.426	0	0.165		94.1902
209	AAEL023673-RA	1:98701658-98702753	18.175	1.214	0.117	0	1.687	2.715	0.039	0.012	0		2.66211
210	AAEL023811-RA	1:210452105-210474118	1521.08	777.658	152.2	83.119	123.422	927.316	419.086	1875.26	1362.34		804.61
211	AAEL023831-RA	1:204496413-204497654	50.506	0.039	0.156	0.001	1.404	1.124	0.006	0.043	0.07		5.92767
212	AAEL023904-RA	2:434008404-434009265	0.267	13.758	0.039	0.077	15.523	0.843	0.131	2.453	0.019		3.67889
213	AAEL024034-RA	3:326948806-326949786	22.533	14.04	27.718	6.679	0.321	0.034	0.175	0.099	0.03		7.95878
214	AAEL024075-RA	3:57834888-57835174	5.314	3.578	0.468	0.047	13.706	2.167	0.012	0.013	0.04		2.81611
215	AAEL024158-RA	1:298226495-298227371	0.125	2.77	0.106	0.197	14.553	0.766	0.219	1.073	0.181		2.22111
216	AAEL024221-RA	1:96471037-96480931	16.718	25.004	21.593	99.699	3.091	44.343	98.451	67.129	202.624		64.2947
217	AAEL024388-RA	2:198249879-198250852	0	0.494	0	0	0.264	120.62	0.549	0.054	0.098		13.5643
218	AAEL024389-RA	3:279982544-279983225	51.39	1.728	0	0	7.738	0.843	0	0.058	0.043		6.86667
219	AAEL024418-RA	3:229928462-229930043	173.41	491.922	270.314	2209.24	34	388.272	2188.89	1016.37	1534.04		922.94
220	AAEL024440-RA	1:210552039-210553669	75.187	52.491	6.323	2.842	41.459	35.865	16.829	121.654	94.061		49.6346
221	AAEL024526-RA	2:182235038-182235793	12.209	2.489	0.019	0.055	1.586	1.855	0.042	0.007	0.023		2.03167
222	AAEL024554-RA	2:395703291-395710009	63.99	9.364	2.077	1.67	23.336	71.859	35.884	80.851	248.99		59.7801
223	AAEL024635-RA	2:172972152-172974257	33.915	53.598	0.175	0.191	14.976	12.977	0.078	0.115	0.032		12.8952
224	AAEL024637-RA	3:161223876-161225941	40.587	5.512	1.861	0.709	6.769	6.086	0.538	1.881	2.707		7.40556
225	AAEL024739-RA	3:148978035-148979470	21.86	5.608	6.626	4.384	1.405	12.073	15.729	5.358	10.836		9.31989
226	AAEL024777-RA	1:33913823-33920907	5.584	8.214	15.864	9.791	1.806	22.838	169.539	0.464	1.687		26.1986
227	AAEL024870-RA	1:81594289-81596849	0	0	0.013	0	0.052	13.81	43.99	0.089	0.062		6.44622
228	AAEL024873-RA	1:3007099-3008138	36.206	11.25	0.273	0.071	20.074	36.936	0.155	0.032	0.081		11.6753
229	AAEL024982-RA	1:38279856-38281775	0	1.563	0.273	0.094	0.379	2.247	3.201	3.948	40.511		5.80178
230	AAEL024983-RA	2:123867820-123869097	44.471	0.041	0.845	0	0.039	25.56	0.116	0.01	0.162		7.916
231	AAEL024993-RA	3:229835321-229836613	26.941	10.291	0.169	0.031	6.803	7.912	0.053	0.421	0.089		5.85667
232	AAEL025088-RA	1:210506433-210509091	319.672	128.129	94.438	27.878	38.804	140.473	154.318	188.579	646.558		193.205
233	AAEL025135-RB	3:217670303-217672390	43.314	61.944	1.248	0.259	110.514	107.151	0.407	0.035	0.118		36.11
234	AAEL025256-RA	1:298259979-298272949	65.424	47.293	25.762	19.432	10.476	228.813	1897.47	351.903	224.716		319.033
235	AAEL025279-RA	2:469242187-469244419	77.277	6.427	4.28	4.085	1.411	22.037	30.354	55.384	29.443		25.6331
236	AAEL025282-RA	3:317024728-317027356	51.391	16.37	1.17	0.072	74.106	0.851	0	0.004	0.057		16.0023
237	AAEL025290-RA	1:210569827-210571457	75.187	53.168	6.418	2.849	41.665	38.049	16.398	119.449	96.355		49.9487
238	AAEL025316-RB	1:152761883-152763343	30.179	22.579	0.538	0.102	28.011	28.182	0.074	0.009	0.061		12.1928
239	AAEL025494-RA	3:154377036-154378672	55.196	37.838	7.345	9.111	17.462	60.777	41.766	11.083	173.438		46.0018
240	AAEL025536-RA	2:110008636-110009556	5.613	29.451	0.398	0.136	40.585	49.024	0.104	0.042	0.171		13.9471
241	AAEL025542-RA	1:202397115-202397818	138.507	143.425	4.38	0.571	280.641	272.177	1.057	0.011	0.017		93.4207
242	AAEL025553-RA	1:38244634-38246589	0.868	5.717	5.992	6.557	2.329	1.685	118.397	53.613	79.747		30.545
243	AAEL025553-RB	1:38244634-38246475	0.868	5.717	5.992	6.557	2.308	1.685	118.397	53.573	79.747		30.5382
244	AAEL025605-RA	2:208794827-208796127	38.709	27.94	5.339	6.772	12.269	47.131	34.884	8.421	145.743		36.3564
245	AAEL025618-RA	1:108734755-108736492	40.044	10.694	46.906	60.608	82.835	373.938	1018.26	478.402	189.25		255.659
246	AAEL025639-RA	3:205904547-205905403	17.726	22.668	0.097	0.082	28.465	2.144	0.054	0.004	0		7.91556
247	AAEL025681-RA	2:177696745-177697799	0.078	5.813	0.078	0	10.309	28.791	0.107	0.038	0.004		5.02422
248	AAEL025802-RA	1:239858402-239860192	41.661	6.706	0.707	0.288	49.409	11.012	0.375	0.107	0.026		12.2546
249	AAEL025812-RA	3:44668776-44669569	18.88	9.122	11.322	29.371	5.201	1.993	6.115	0.072	0.01		9.12067
250	AAEL025920-RA	2:147507350-147515640	426.976	204.398	85.027	44.669	137.768	308.984	101.671	125.693	1107.47		282.517
251	AAEL026001-RA	3:161210466-161211310	40.565	8.144	8.136	2.28	8.352	6.882	1.45	2.58	3.91		9.14433
252	AAEL026008-RA	2:64848262-64849057	0	2.057	2.878	1.786	0.641	1.404	4.481	4.065	18.853		4.01833
253	AAEL026154-RA	2:453146420-453151801	22.358	11.017	15.308	4.743	7.775	13.429	107.586	41.462	113.493		37.4634
254	AAEL026166-RA	3:105729683-105740241	473.481	153.614	55.32	36.938	15.001	116.756	153.913	166.883	179.343		150.139
255	AAEL026198-RA	1:103565897-103566419	108.048	32.622	0.395	0.073	137.409	16.986	0.034	0.101	0.033		32.8557
256	AAEL026263-RA	3:409153448-409154577	20.155	7.897	0.273	0.024	7.82	2.388	0.058	0.01	0.056		4.29789
257	AAEL026268-RA	1:7501900-7502834	26.029	2.491	0.032	0.026	3.177	2.881	0.015	0	0.007		3.85089
258	AAEL026570-RA	3:314153310-314161983	239.381	220.576	178.879	137.077	65.526	516.409	1465.13	389.886	714.073		436.326
259	AAEL026638-RA	2:461344071-461354413	773.119	717.652	289.245	409.82	44.226	1483.74	4787.77	1739.53	4754.16		1666.59
260	AAEL026924-RA	3:288752673-288753522	29.232	1.069	0	0	2.051	1.124	0.209	0.089	6.068		4.42689
261	AAEL026925-RA	1:152336174-152337281	7.608	24.185	0.507	0.165	41.922	38.903	0.204	3.488	0		12.998
262	AAEL026992-RA	1:210553749-210555379	75.187	52.523	6.323	2.857	41.455	35.97	16.851	121.734	94.231		49.6812
263	AAEL027082-RA	2:191157591-191158813	22.925	19.866	0.702	0	38.259	103.777	0.32	0.004	0.01		20.6514
264	AAEL027083-RA	1:29314700-29316697	9.492	19.154	31.767	9.142	2.383	6.096	0.368	0.22	0.229		8.76122
265	AAEL027212-RA	2:300878007-300879437	43.514	13.278	0.078	0.094	13.162	47.816	0.116	0	0.003		13.1179
266	AAEL027227-RA	3:351124790-351125821	500.803	312.874	97.049	5793.82	184.192	719.289	4772.93	647.442	544.191		1508.07
267	AAEL027231-RA	3:383819838-383820329	58.283	14.112	0.335	0.089	65.402	4.817	0.175	0.556	0.093		15.9847
268	AAEL027252-RA	1:210550327-210551957	74.787	51.197	6.236	2.767	40.936	32.747	15.105	122.639	91.558		48.6636
269	AAEL027325-RA	2:316718904-316719226	4.561	0.082	0.104	0.016	26.423	2.481	0.048	0.547	0.009		3.80789
270	AAEL027353-RA	2:20927139-20928651	4.077	7.135	1.118	9.377	5.254	93.441	571.588	440.011	100.425		136.936
271	AAEL027398-RA	1:149054571-149075058	18.128	28.739	0.977	0.306	14.117	18.274	0.67	1085.22	0.978		129.712
272	AAEL027510-RB	3:285032490-285033552	26.496	9.625	1.17	0.752	0.875	21.347	44.237	44.878	14.324		18.1893
273	AAEL027510-RD	3:285032490-285033454	26.496	9.625	1.17	0.752	0.875	21.347	44.237	44.834	14.324		18.1844
274	AAEL027569-RA	3:233125486-233127504	461.163	1209.61	694.267	5251.41	83.808	793.519	4620.97	1678.37	4160.6		2105.97
275	AAEL027724-RA	2:469207844-469220681	1114.63	1153.33	1500.72	525.771	115.663	1015.82	2277.72	2020.49	2787.65		1390.2
276	AAEL027735-RA	3:34248945-34249530	0	0	0	0	0.085	0.562	16.207	0	0.072		1.88067
277	AAEL027795-RB	3:222071195-222072621	0.295	5.225	0.473	0.109	0.876	8.724	1.128	0.192	856.318		97.0378
278	AAEL027947-RA	2:461612158-461615388	48.922	18.101	0.234	0.188	8.02	13.857	1.993	0.077	1.724		10.3462
279	AAEL027964-RA	3:136448982-136467287	140.366	470.312	241.268	2121.36	32.996	325.755	1732.88	256.258	371.947		632.571
280	AAEL028001-RA	3:275761534-275763222	0	0.505	1.03	0.89	27.947	0	0.407	0.249	0.644		3.51911
281	AAEL028007-RA	2:147535585-147536654	65.405	14.506	4.143	3.771	1.94	26.18	12.252	30.404	72.098		25.6332
282	AAEL028031-RA	3:19497499-19498401	51.59	2.29	0.156	0	5.619	10.767	0.116	0.04	0		7.842
283	AAEL028043-RA	2:41898380-41900221	25.161	9.542	91.239	10.011	8.194	9.269	97.069	86.582	393.033		81.1222
284	AAEL028043-RB	2:41898380-41900108	25.161	9.542	91.239	10.011	8.194	9.269	97.069	86.582	392.981		81.1164
285	AAEL028071-RA	3:30493828-30494668	0	21.912	0.078	0.047	0.025	0.01	0	0	0.001		2.45256
286	AAEL028105-RA	1:140794963-140795468	48.653	37.866	45.23	28.365	272.809	84.546	85.139	312.393	293.257		134.251
287	AAEL028186-RA	1:210555460-210557090	74.119	51.721	6.255	2.693	41.105	35.795	16.873	129.889	92.479		50.1032
288	AAEL028194-RA	1:29325229-29326231	9.483	15.92	25.162	7.626	1.972	3.128	0.244	0.153	0.242		7.10333
289	AAEL028200-RA	3:314134270-314136858	633.046	306.447	459.633	154.591	34.536	166.152	561.846	318.151	281.749		324.017
290	AAEL028219-RA	1:3952061-3952897	12.443	4.128	0.019	0.092	1.896	1.139	0.057	0.01	0.035		2.20211
291	AAEL028773-RA	3:100749404-100749486	0.08	0.158	0.062	0.038	0.18	0	0.516	0.857	40.844		4.74833
292	AAEL028893-RA	2:74807375-74807458	17.116	0.133	0.039	0	0.004	0	1.433	18.5	2.325		4.39444
293	AAEL028918-RA	3:100606295-100606376	1.468	4.19	1.111	5.021	0.874	0	3.51	0.21	19.604		3.99867
294	AAEL028976-RA	1:208367994-208368076	2.202	22.158	26.427	30.85	154.818	0.843	8.169	30.11	39.473		35.0056
295	AAEL028995-RA	3:101031599-101031680	24.727	9.314	48.359	45.068	3.379	5.049	133.21	24.333	34.366		36.4228
