# Supplementary material for: A mosquito small RNA genomics resource reveals dynamic evolution and host responses to viruses and transposons
Source: HighWire-hosted journal article supplement (doi:10.1101/gr.265157.120), 2021-01-08
Supplement: SupplementalTableS6.xlsx [file SupplementalTableS6.xlsx]

## Sheet: TableS6_AeAlbo_MetaTable
Table S6. Metatable of AeAlbo samples and cell lines, and additional tabs of top Genic and Intergenic piRNA clusters.
Updated Sample Name	Library Size (all replicates)	Percent Genome Mapped	miRNA counts	siRNA counts	piRNA counts	Virus counts	TE counts	Genecentric count	Intergenic counts	StructureRNA_Derived_siRNA	StructureRNA_Derived_piRNA	Source		Sum	Updated Sample Name	miRNA counts	siRNA counts	piRNA counts	Virus counts	TE counts	Genecentric count	Intergenic counts	StructureRNA_Derived_siRNA	StructureRNA_Derived_piRNA
AeAlbo_Ovary_OA	48076735	0.87	22118	157900	731917	125	209219	342090	316487	9353	2262	AeAlbo_experiment_20181221		1791471	AeAlbo_Ovary_OA	0.0123463	0.0881399	0.408556	6.97751e-05	0.116786	0.190955	0.176663	0.00522085	0.00126265
AeAlbo_Testis_OA	25895868	0.92	64096	148309	490978	215	138765	321389	238401	21485	8541	AeAlbo_experiment_20181221		1432179	AeAlbo_Testis_OA	0.0447542	0.103555	0.342819	0.000150121	0.0968908	0.224406	0.16646	0.0150016	0.00596364
AeAlbo_Fcarc_OA	4891727	0.93	225803	129034	424855	1269	492064	219438	101445	21640	6134	AeAlbo_experiment_20181221		1621682	AeAlbo_Fcarc_OA	0.13924	0.079568	0.261984	0.000782521	0.303428	0.135315	0.0625554	0.0133442	0.00378249
AeAlbo_Mcarc_OA	29437769	0.95	229814	86632	211690	127	196498	189796	97968	29603	11441	AeAlbo_experiment_20181221		1053569	AeAlbo_Mcarc_OA	0.218129	0.0822272	0.200927	0.000120543	0.186507	0.180146	0.0929868	0.0280978	0.0108593
AeAlbo_Larv_OA	10155143	0.93	47685	212396	596028	1387	485896	221669	88292	119634	71598	AeAlbo_experiment_20181221		1844585	AeAlbo_Larv_OA	0.0258513	0.115146	0.323123	0.000751931	0.263418	0.120173	0.0478655	0.0648569	0.0388152
AeAlbo_U4_4_NL_cells	19256622	0.9	116417	116527	757172	1780	1174800	327094	161276	2346	733	AeAlbo_experiment_20181221		2658145	AeAlbo_U4_4_NL_cells	0.0437963	0.0438377	0.28485	0.00066964	0.441962	0.123053	0.0606724	0.00088257	0.000275756
AeAlbo_C636_NL_cells_rep_3	19637009	0.91	181463	55960	715683	5050	794551	330606	235669	8215	3576	AeAlbo_sRNA_20190320		2330773	AeAlbo_C636_NL_cells_rep_3	0.0778553	0.0240092	0.307058	0.00216666	0.340896	0.141844	0.101112	0.00352458	0.00153425
AeAlbo_C7-10_NL_cells	9340375	0.94	304667	84933	197323	4784	210147	130000	112494	3274	968	AeAlbo_experiment_20181003		1048590	AeAlbo_C7-10_NL_cells	0.290549	0.0809973	0.188179	0.00456232	0.200409	0.123976	0.107281	0.00312229	0.000923144
AeAlbo_MaleWhole_CT	14927280	0.91	445618	175401	387103	229	132094	156156	125859	179068	17032	AeAlbo_sRNAs_ChenTu_lab_PRJNA178303		1618560	AeAlbo_MaleWhole_CT	0.275318	0.108369	0.239165	0.000141484	0.0816121	0.0964784	0.0777599	0.110634	0.0105229
AeAlbo_FemaleWhole_Sugar_CT	16882404	0.91	170296	246579	546661	171	134966	379485	164253	117422	22446	AeAlbo_sRNAs_ChenTu_lab_PRJNA178303		1782279	AeAlbo_FemaleWhole_Sugar_CT	0.0955496	0.13835	0.30672	9.59446e-05	0.0757266	0.212921	0.092159	0.0658831	0.012594
AeAlbo_FemaleWhole_BF_CT	16453609	0.92	214444	218099	416913	124	141431	249992	211407	103394	7403	AeAlbo_sRNAs_ChenTu_lab_PRJNA178303		1563207	AeAlbo_FemaleWhole_BF_CT	0.137182	0.13952	0.266704	7.93241e-05	0.0904749	0.159923	0.135239	0.0661422	0.00473578
AeAlbo_Embryo0-1day_CT	16651359	0.92	78282	289824	682564	1161	179994	359593	358933	20450	2025	AeAlbo_sRNAs_ChenTu_lab_PRJNA178303		1972826	AeAlbo_Embryo0-1day_CT	0.0396801	0.146908	0.345983	0.000588496	0.0912366	0.182273	0.181938	0.0103658	0.00102645
AeAlbo_Larvae_CT	17940219	0.87	71205	427927	550858	198	99715	242528	137936	180451	53747	AeAlbo_sRNAs_ChenTu_lab_PRJNA178303		1764565	AeAlbo_Larvae_CT	0.0403527	0.242511	0.312178	0.000112209	0.0565097	0.137444	0.07817	0.102264	0.0304591
AeAlbo_Pupae_CT	18197857	0.95	113529	463122	363143	129	81039	98967	92189	487466	73080	AeAlbo_sRNAs_ChenTu_lab_PRJNA178303		1772664	AeAlbo_Pupae_CT	0.0640443	0.261258	0.204857	7.27718e-05	0.0457159	0.0558295	0.0520059	0.274991	0.0412261
AeAlbo_C636_2dpi_mock1	5347719	0.95	448228	152973	317693	2820	147715	157191	111278	8614	1784	AeAlbo_sRNAs_Ebels_lab_PRJNA533980		1348296	AeAlbo_C636_2dpi_mock1	0.33244	0.113457	0.235626	0.00209153	0.109557	0.116585	0.0825323	0.0063888	0.00132315
AeAlbo_C636_2dpi_mock2	6315069	0.91	250532	151039	566818	1621	162691	233176	185082	8803	2000	AeAlbo_sRNAs_Ebels_lab_PRJNA533980		1561762	AeAlbo_C636_2dpi_mock2	0.160416	0.0967106	0.362935	0.00103793	0.104171	0.149303	0.118508	0.00563658	0.0012806
AeAlbo_C636_2dpi_mock3	7207566	0.92	262246	152169	537969	1777	163042	225132	179966	10341	1867	AeAlbo_sRNAs_Ebels_lab_PRJNA533980		1534509	AeAlbo_C636_2dpi_mock3	0.170899	0.0991646	0.350581	0.00115803	0.10625	0.146713	0.117279	0.00673896	0.00121668
AeAlbo_C636_2dpi_SINV1	7129048	0.91	189642	93719	594129	2215	152986	189863	158908	18621	6874	AeAlbo_sRNAs_Ebels_lab_PRJNA533980		1406957	AeAlbo_C636_2dpi_SINV1	0.134789	0.0666111	0.422279	0.00157432	0.108735	0.134946	0.112944	0.0132349	0.00488572
AeAlbo_C636_2dpi_SINV2	7868302	0.94	170198	57081	537239	2175	195472	177397	117752	13216	4183	AeAlbo_sRNAs_Ebels_lab_PRJNA533980		1274713	AeAlbo_C636_2dpi_SINV2	0.133519	0.0447795	0.421459	0.00170627	0.153346	0.139166	0.0923753	0.0103678	0.00328152
AeAlbo_C636_2dpi_SINV3	6282181	0.95	116888	40182	487975	1462	220245	240701	102043	9349	3150	AeAlbo_sRNAs_Ebels_lab_PRJNA533980		1221995	AeAlbo_C636_2dpi_SINV3	0.0956534	0.0328823	0.399327	0.0011964	0.180234	0.196974	0.0835053	0.0076506	0.00257775
AeAlbo_C636_2dpi_WNV1	7035199	0.92	307211	118516	503811	6319	154651	210011	162935	10180	2438	AeAlbo_sRNAs_Ebels_lab_PRJNA533980		1476072	AeAlbo_C636_2dpi_WNV1	0.208127	0.0802915	0.341319	0.00428096	0.104772	0.142277	0.110384	0.00689668	0.00165168
AeAlbo_C636_2dpi_WNV2	4316828	0.92	265617	125840	495927	5393	159185	230750	163337	11966	2588	AeAlbo_sRNAs_Ebels_lab_PRJNA533980		1460603	AeAlbo_C636_2dpi_WNV2	0.181854	0.0861562	0.339536	0.00369231	0.108986	0.157983	0.111828	0.00819251	0.00177187
AeAlbo_C636_2dpi_WNV3	2318096	0.93	322464	126958	449854	4982	156712	196497	160894	13009	2787	AeAlbo_sRNAs_Ebels_lab_PRJNA533980		1434157	AeAlbo_C636_2dpi_WNV3	0.224846	0.0885245	0.313671	0.00347382	0.109271	0.137012	0.112187	0.00907083	0.0019433
AeAlbo_C636_6dpi_mock1	5615100	0.93	320338	127817	466076	2230	149965	194840	156085	15948	2870	AeAlbo_sRNAs_Ebels_lab_PRJNA533980		1436169	AeAlbo_C636_6dpi_mock1	0.22305	0.0889986	0.324527	0.00155274	0.10442	0.135666	0.108681	0.0111045	0.00199837
AeAlbo_C636_6dpi_mock2	7243062	0.93	294601	110743	470276	1879	143653	207837	170744	17061	3273	AeAlbo_sRNAs_Ebels_lab_PRJNA533980		1420067	AeAlbo_C636_6dpi_mock2	0.207456	0.0779843	0.331165	0.00132318	0.101159	0.146357	0.120237	0.0120142	0.00230482
AeAlbo_C636_6dpi_mock3	6212564	0.93	309027	149601	438989	2195	140345	185767	152668	18984	3228	AeAlbo_sRNAs_Ebels_lab_PRJNA533980		1400804	AeAlbo_C636_6dpi_mock3	0.220607	0.106797	0.313384	0.00156696	0.100189	0.132615	0.108986	0.0135522	0.00230439
AeAlbo_C636_6dpi_SINV1	7719167	0.8	207538	100476	544517	12893	137788	154836	106409	35217	14313	AeAlbo_sRNAs_Ebels_lab_PRJNA533980		1313987	AeAlbo_C636_6dpi_SINV1	0.157945	0.0764665	0.414401	0.00981212	0.104863	0.117837	0.0809818	0.0268016	0.0108928
AeAlbo_C636_6dpi_SINV2	8804382	0.82	216892	93707	503404	12878	127137	153883	109941	37659	15038	AeAlbo_sRNAs_Ebels_lab_PRJNA533980		1270539	AeAlbo_C636_6dpi_SINV2	0.170709	0.0737537	0.396213	0.0101359	0.100065	0.121116	0.086531	0.0296402	0.0118359
AeAlbo_C636_6dpi_SINV3	6788721	0.81	219148	102881	533049	13594	135656	151234	108075	37972	13635	AeAlbo_sRNAs_Ebels_lab_PRJNA533980		1315244	AeAlbo_C636_6dpi_SINV3	0.166622	0.078222	0.405285	0.0103357	0.103141	0.114986	0.0821711	0.0288707	0.0103669
AeAlbo_C636_6dpi_WNV1	7048697	0.95	215282	76420	379664	0	88423	179500	113424	43462	8797	AeAlbo_sRNAs_Ebels_lab_PRJNA533980		1104972	AeAlbo_C636_6dpi_WNV1	0.19483	0.0691601	0.343596	0	0.0800228	0.162448	0.102649	0.0393331	0.00796129
AeAlbo_C636_6dpi_WNV2	6654634	0.95	204867	75891	380758	16604	88566	185401	122008	42849	8982	AeAlbo_sRNAs_Ebels_lab_PRJNA533980		1125926	AeAlbo_C636_6dpi_WNV2	0.181954	0.0674032	0.338173	0.014747	0.0786606	0.164665	0.108362	0.0380567	0.00797743
AeAlbo_C636_6dpi_WNV3	8354730	0.95	198537	78437	379365	15682	94062	179353	117018	49295	9612	AeAlbo_sRNAs_Ebels_lab_PRJNA533980		1121361	AeAlbo_C636_6dpi_WNV3	0.17705	0.069948	0.338308	0.0139848	0.083882	0.159942	0.104354	0.04396	0.00857173
AeAlbo_FemaleWhole_Denv2_JG	21901364	0.93	106826	109746	854715	1771	165341	388466	418424	34921	9637	AeAlbo_sRNAs_Gu_lab_SRP049501		2089847	AeAlbo_FemaleWhole_Denv2_JG	0.0511167	0.0525139	0.408984	0.00084743	0.0791163	0.185883	0.200218	0.0167098	0.00461134
AeAlbo_FemaleWhole_Ctrl_JG	10914666	0.5	81938	71647	1817291	45	58198	121168	86635	8585	6366	AeAlbo_sRNAs_Gu_lab_SRP049501		2251873	AeAlbo_FemaleWhole_Ctrl_JG	0.0363866	0.0318166	0.807013	1.99834e-05	0.0258443	0.0538077	0.0384724	0.00381238	0.00282698
AeAlbo_FemaleMidgut_Denv2_JG	12187592	0.97	65403	546325	392644	223	112536	167825	230223	537862	118476	AeAlbo_sRNAs_Gu_lab_SRP049501		2171517	AeAlbo_FemaleMidgut_Denv2_JG	0.0301186	0.251587	0.180816	0.000102693	0.0518237	0.0772847	0.106019	0.24769	0.0545591
AeAlbo_FemaleMidgut_Ctrl_JG	12104398	0.96	78267	550943	370026	3073	183124	375150	331685	321643	30323	AeAlbo_sRNAs_Gu_lab_SRP049501		2244234	AeAlbo_FemaleMidgut_Ctrl_JG	0.0348747	0.245493	0.164879	0.00136929	0.0815976	0.167162	0.147794	0.14332	0.0135115
AeAlbo_U44_CHIKV_AZT_3dpi	2842301	0.79	130757	851181	273183	210876	251789	338059	149949	18953	1375	AeAlbo_sRNAs_Saleh_lab_SRP062828		2226122	AeAlbo_U44_CHIKV_AZT_3dpi	0.0587376	0.38236	0.122717	0.094728	0.113107	0.15186	0.0673588	0.00851391	0.000617666
AeAlbo_U44_CHIKV_3dpi	25018877	0.82	123832	573665	516315	140673	289010	353184	193591	14302	1707	AeAlbo_sRNAs_Saleh_lab_SRP062828		2206279	AeAlbo_U44_CHIKV_3dpi	0.0561271	0.260015	0.234021	0.0637603	0.130994	0.160081	0.0877455	0.00648241	0.000773701
AeAlbo_C636_CHIKV_AZT_3dpi	59572366	0.88	234099	105231	794600	6289	268656	296006	262060	4598	1730	AeAlbo_sRNAs_Saleh_lab_SRP062828		1973269	AeAlbo_C636_CHIKV_AZT_3dpi	0.118635	0.0533283	0.402682	0.0031871	0.136148	0.150008	0.132805	0.00233014	0.000876718
AeAlbo_C636_CHIKV_3dpi	55579804	0.88	241784	83876	811411	8249	248804	303549	256719	2168	1172	AeAlbo_sRNAs_Saleh_lab_SRP062828		1957732	AeAlbo_C636_CHIKV_3dpi	0.123502	0.0428435	0.414465	0.00421355	0.127088	0.155051	0.131131	0.0011074	0.000598652
AeAlbo_CHIKV_AZT_9dpi	31224270	0.84	74774	468550	637326	9090	106150	306004	122465	282836	100651	AeAlbo_sRNAs_Saleh_lab_SRP062828		2107846	AeAlbo_CHIKV_AZT_9dpi	0.0354741	0.222289	0.302359	0.00431246	0.0503595	0.145174	0.0580996	0.134182	0.0477506
AeAlbo_CHIKV_9dpi	75998416	0.85	82780	402663	684829	9283	114912	333640	157887	227143	80433	AeAlbo_sRNAs_Saleh_lab_SRP062828		2093570	AeAlbo_CHIKV_9dpi	0.0395401	0.192333	0.327111	0.00443405	0.0548881	0.159364	0.0754152	0.108496	0.0384191
AeAlbo_CHIKV_AZT_3dpi	13037089	0.85	79854	472360	618377	2258	94104	307580	109222	314118	116994	AeAlbo_sRNAs_Saleh_lab_SRP062828		2114867	AeAlbo_CHIKV_AZT_3dpi	0.0377584	0.223352	0.292395	0.00106768	0.0444964	0.145437	0.0516449	0.148528	0.0553198
AeAlbo_CHIKV_3dpi	20144965	0.86	63283	390372	703480	3987	93101	327988	125038	257417	116813	AeAlbo_sRNAs_Saleh_lab_SRP062828		2081479	AeAlbo_CHIKV_3dpi	0.0304029	0.187545	0.337971	0.00191546	0.0447283	0.157574	0.0600717	0.12367	0.0561202
AeAlbo_WholeBody_CHIKV	5813761	0.9	186984	92135	772740	4417	147584	334391	288745	48661	11955	AeAlbo_sRNAs_Myles_lab_SRP008316		1887612	AeAlbo_WholeBody_CHIKV	0.0990585	0.0488103	0.409374	0.00233999	0.0781856	0.17715	0.152968	0.0257791	0.0063334
AeAlbo_HeadThor_CHIKV	11286532	0.95	385965	270599	348714	12555	105303	285261	178983	181872	23052	AeAlbo_sRNAs_Myles_lab_SRP008316		1792304	AeAlbo_HeadThor_CHIKV	0.215346	0.150978	0.194562	0.00700495	0.0587529	0.159159	0.099862	0.101474	0.0128617
AeAlbo_HeadThor_CHIKV-B2_NOV	19021031	0.96	412966	247835	243721	3749	128800	367222	125017	76067	10425	AeAlbo_sRNAs_Myles_lab_SRP008316		1615802	AeAlbo_HeadThor_CHIKV-B2_NOV	0.25558	0.153382	0.150836	0.00232021	0.0797127	0.227269	0.0773715	0.0470769	0.0064519
AeAlbo_HeadThor_CHIKV-deltaB2_NOV	23617443	0.94	514586	193907	258440	8528	99442	115836	153436	118099	18875	AeAlbo_sRNAs_Myles_lab_SRP008316		1481149	AeAlbo_HeadThor_CHIKV-deltaB2_NOV	0.347424	0.130917	0.174486	0.00575769	0.0671384	0.0782069	0.103593	0.0797347	0.0127435
AeAlbo_HeadThor_CHIKV-B2_FHV	28035277	0.96	419927	123834	436303	5366	115963	159641	214268	95129	19242	AeAlbo_sRNAs_Myles_lab_SRP008316		1589673	AeAlbo_HeadThor_CHIKV-B2_FHV	0.264159	0.077899	0.274461	0.00337554	0.0729477	0.100424	0.134787	0.0598419	0.0121044
AeAlbo_U4.4_CHIKV	20828378	0.78	42654	694871	489150	40596	392869	451816	221800	17861	1741	AeAlbo_sRNAs_Myles_lab_SRP008316		2353358	AeAlbo_U4.4_CHIKV	0.0181247	0.295268	0.207852	0.0172502	0.16694	0.191988	0.0942483	0.00758958	0.000739794
AeAlbo_C710_CHIKV	17271561	0.78	107100	157278	939162	26918	209651	274726	283506	4413	1081	AeAlbo_sRNAs_Myles_lab_SRP008316		2003835	AeAlbo_C710_CHIKV	0.0534475	0.0784885	0.468682	0.0134332	0.104625	0.1371	0.141482	0.00220228	0.000539466
AeAlbo_C636_CHIKV	5106839	0.8	66162	132195	809027	60836	237591	311272	346999	14250	4135	AeAlbo_sRNAs_Myles_lab_SRP008316		1982467	AeAlbo_C636_CHIKV	0.0333736	0.0666821	0.408091	0.030687	0.119846	0.157012	0.175034	0.00718801	0.00208579
AeAlbo_C636_CHIKV_B2_FHV_1	24664930	0.89	100524	132998	841895	44373	231473	300254	352784	9720	3173	AeAlbo_sRNAs_Myles_lab_SRP008316		2017194	AeAlbo_C636_CHIKV_B2_FHV_1	0.0498336	0.0659322	0.417359	0.0219974	0.11475	0.148847	0.174888	0.00481857	0.00157298
AeAlbo_C636_B2_FHV_c44y_1	18895730	0.87	64553	138134	865662	53926	277510	358154	395949	22864	8320	AeAlbo_sRNAs_Myles_lab_SRP008316		2185072	AeAlbo_C636_B2_FHV_c44y_1	0.0295427	0.0632171	0.396171	0.0246793	0.127003	0.163909	0.181206	0.0104637	0.00380765
AeAlbo_C636_B2_FHV_r54q	18485555	0.86	49946	200006	797207	68093	311115	345228	365878	14060	5005	AeAlbo_sRNAs_Myles_lab_SRP008316		2156538	AeAlbo_C636_B2_FHV_r54q	0.0231603	0.092744	0.36967	0.0315751	0.144266	0.160084	0.16966	0.00651971	0.00232085
AeAlbo_C636_CHIKV_B2_FHV_2	30561762	0.94	268733	160466	427426	29443	148535	204994	181801	26384	10008	AeAlbo_sRNAs_Myles_lab_SRP008316		1457790	AeAlbo_C636_CHIKV_B2_FHV_2	0.184343	0.110075	0.293201	0.020197	0.101891	0.14062	0.12471	0.0180986	0.00686519
AeAlbo_C636_B2_FHV_c44a_2	36518785	0.92	284541	114806	544548	32846	169431	237896	211633	23232	9619	AeAlbo_sRNAs_Myles_lab_SRP008316		1628552	AeAlbo_C636_B2_FHV_c44a_2	0.17472	0.0704958	0.334376	0.0201688	0.104038	0.146078	0.129952	0.0142654	0.00590647
AeAlbo_C636HT_cells	13929700	0.91	354661	116798	457477	3764	220067	234040	205206	21400	9722	AeAlbo_sRNAs_Benito_lab_SRP099461		1623135	AeAlbo_C636HT_cells	0.218504	0.0719583	0.281848	0.00231897	0.135581	0.14419	0.126426	0.0131844	0.00598964
AeAlbo_C636HT_DENV2_Acute	18534302	0.91	369624	123153	453190	3833	218169	231436	207764	13040	5604	AeAlbo_sRNAs_Benito_lab_SRP099461		1625813	AeAlbo_C636HT_DENV2_Acute	0.227347	0.0757486	0.278747	0.00235759	0.134191	0.142351	0.127791	0.0080206	0.00344689
AeAlbo_C636HT_DENV2_Persist	18461099	0.91	398710	111297	391412	9546	216515	195443	145571	17298	7784	AeAlbo_sRNAs_Benito_lab_SRP099461		1493576	AeAlbo_C636HT_DENV2_Persist	0.26695	0.0745171	0.262064	0.00639137	0.144964	0.130856	0.0974647	0.0115816	0.00521165
AeAlbo_U4-4_SINV_GFP	25013657	0.95	713872	114406	215125	15685	120694	87190	44853	6496	2603	AeAlbo_sRNAs_SalehVanRij_lab_SRA047263		1320924	AeAlbo_U4-4_SINV_GFP	0.540434	0.0866106	0.162859	0.0118743	0.0913709	0.0660068	0.0339558	0.00491777	0.00197059
AeAlbo_C636_SINV_GFP	10090658	0.95	830918	45631	143097	4816	32262	32927	14995	6203	4405	AeAlbo_sRNAs_SalehVanRij_lab_SRA047263		1115254	AeAlbo_C636_SINV_GFP	0.745048	0.0409153	0.128309	0.0043183	0.0289279	0.0295242	0.0134454	0.00556196	0.00394977
AeAlbo_C636_SINV_GFP_betaE	25052745	0.41	39934	224106	2115272	26572	427156	179607	134903	42197	16148	AeAlbo_sRNAs_SalehVanRij_lab_SRA047263		3205895	AeAlbo_C636_SINV_GFP_betaE	0.0124564	0.0699043	0.659807	0.00828848	0.133241	0.056024	0.0420797	0.0131623	0.00503697
																			Average % of reads targeting transposons:	0.115585

## Sheet: TableS6_AeAlbo_Intergenic_piRCL
Table S6. Metatable of AeAlbo samples and cell lines, and additional tabs of top Genic and Intergenic piRNA clusters. Counts are reads per million.
	Curated_region	Size	Start	Stop	Ovary_OA	Testis_OA	Fcarc_OA	Mcarc_OA	Larv_OA	U4_4_cells	C7-10_cells	C636_cells_rep_3		Average
1	NW_021837045.1:133513126-133517175	4049	133513126	133517175	1494.33	700.969	179.467	2.5	3.1	0	0	0		297.545
2	NW_021837045.1:135254426-135304175	49749	135254426	135304175	117.243	29.266	32.986	35.415	62.695	746.755	526.223	385.018		241.95
3	NW_021837045.1:135326601-135348550	21949	135326601	135348550	640.893	445.742	1674.45	1574.43	1717.98	3431.61	655.007	1829.84		1496.24
4	NW_021837045.1:135358976-135389050	30074	135358976	135389050	808.868	364.833	1160.09	982.163	1326.87	2467.05	611.744	1814.7		1192.04
5	NW_021837045.1:137133626-137143575	9949	137133626	137143575	391.925	156.343	546.897	515.693	569.756	1712.19	507.305	453.835		606.743
6	NW_021837045.1:137140301-137167400	27099	137140301	137167400	989.664	634.231	2456.55	2466.49	2005.76	3124.69	855.879	1902.65		1804.49
7	NW_021837045.1:137151526-137178675	27149	137151526	137178675	724.761	562.031	2065.48	2162.22	1755.31	2763.41	1081.02	2309.02		1677.91
8	NW_021837045.1:137188876-137192975	4099	137188876	137192975	285.506	172.671	624.158	561.095	533.335	576.643	129.748	239.159		390.289
9	NW_021837045.1:137314401-137335200	20799	137314401	137335200	217.085	63.11	150.304	136.991	328.505	711.6	222.433	231.472		257.688
10	NW_021837045.1:151624176-151632075	7899	151624176	151632075	396.162	1400.18	735.223	1754.96	401.797	242.028	119.656	125.278		646.911
11	NW_021837045.1:32111301-32113200	1899	32111301	32113200	1388.7	2304	9608.5	5168.3	5679.5	5390.9	8847.07	35451.8		9229.84
12	NW_021837045.1:32711101-32714125	3024	32711101	32714125	9	21.7	1.7	0.1	0	0.4	5.683	259.741		37.2905
13	NW_021837046.1:23900326-23924000	23674	23900326	23924000	143.156	46.343	75.444	85.949	198.898	1358.87	985.205	1575.64		558.687
14	NW_021837046.1:23927601-23973025	45424	23927601	23973025	163.413	62.786	210.063	212.229	341.488	1476.6	749.857	1580.71		599.643
15	NW_021837046.1:35869576-35870625	1049	35869576	35870625	110.052	77.146	9.036	0.2	0.4	0.1	0	0.3		24.6543
16	NW_021837046.1:61500751-61516700	15949	61500751	61516700	937.626	495.846	100.115	7.6	15.7	22.4	3.1	3		198.173
17	NW_021837058.1:21101-113725	89624	21101	110725	4074.6	2250.33	2775.29	1634.78	1558.17	3517.48	2633.03	5240.29		2960.49
18	NW_021837058.1:90376-113400	13274	93901	107175	1318.8	1159.42	1777.79	1101.37	712.726	1004.27	1045.35	2339.46		1307.4
19	NW_021837192.1:62601-67700	5099	62601	67700	29.95	899.459	304.982	722.66	574.449	19.153	68.931	44.352		332.992
20	NW_021837267.1:18079826-18101825	21999	18079826	18101825	1012.5	363.227	73.356	0	67.751	0	0	0		189.604
21	NW_021837267.1:2380551-2419825	39274	2380551	2419825	1225.08	2595.84	6916.66	11439	5183.95	9895.99	2012.45	16844.1		7014.13
22	NW_021837378.1:29035201-29043575	8374	29035201	29043575	91.61	130.089	303.826	319.426	498.857	538.32	599.655	935.388		427.146
23	NW_021837378.1:45980469-46023766	43297	45980469	46023766	568.3	545.5	153.4	18.1	26.6	28.5	9	7.7		169.637
24	NW_021837378.1:46708478-46736988	28510	46708478	46736988	846.7	711	216.8	25.3	47.5	41.4	9.8	5.5		238
25	NW_021837378.1:47587715-47611939	24224	47587715	47611939	898.7	514	276.1	48.1	64.2	79.3	51.9	87.9		252.525
26	NW_021837378.1:47822604-47845644	23040	47822604	47845644	694.5	222.6	179.3	22.4	29.4	38.2	22.9	29.1		154.8
27	NW_021837378.1:47246151-47277475	31324	47246151	47277475	1026.18	284.765	91.921	9.5	21.6	19.3	1.9	4.9		182.509
28	NW_021837378.1:48113121-48139347	26226	48113121	48139347	731.3	281.8	179.9	12.2	24	33.8	6.7	11.9		160.2
29	NW_021837478.1:279026-294700	15674	279026	294700	857.511	568.449	110.148	15.2	38.7	35.9	2.7	3.8		204.051
30	NW_021837489.1:2333201-2334875	1674	2333201	2334875	291.855	416.611	1888.14	1197.19	2082.76	348.1	815.096	3903.6		1367.92
31	NW_021837489.1:2344876-2362075	17199	2344876	2362075	4562.92	5092.02	13448.4	15415.9	16186.5	23999	14242.4	24899.5		14730.8
32	NW_021837489.1:3870001-3871350	1349	3870001	3871350	15.416	98.588	82.049	123.786	358.796	276.139	110.148	1084.54		268.683
33	NW_021837600.1:41722601-41725550	2949	41722601	41725550	1016.92	286.106	142.023	30.023	49.199	56.359	181.999	264.555		253.399
34	NW_021837600.1:41739026-41744200	5174	41739026	41744200	1366.89	621.624	156.58	15.328	58.839	226.986	32.659	104.542		322.931
35	NW_021837600.1:49326051-49328500	2449	49326051	49328500	187.052	57.323	22.823	0	14.303	72.47	31.549	47.057		54.0721
36	NW_021837601.1:467726-474575	6849	467726	474575	764.906	345.766	55.744	2.8	5	7.6	0	0.4		147.777
37	NW_021837998.1:314476-333025	18549	314476	333025	260.195	262.824	780.325	655.59	1008.62	2588.73	1880.83	2724.36		1270.19
38	NW_021837998.1:381176-429425	48249	381176	429425	814.091	763.331	2033.89	2094.27	2142.23	5454.72	4505.29	6840.93		3081.09
39	NW_021838042.1:8557651-8559200	1549	8557651	8559200	1253.02	291.682	160.118	2.5	2.6	0.5	0	0		213.802
40	NW_021838076.1:1155151-1167700	12549	1155151	1167700	417.323	83.659	144.379	55.402	68.702	331.926	100.627	141.436		167.932
41	NW_021838153.1:164471826-164501875	30049	164471826	164501875	232.716	175.075	303.123	261.612	531.195	1052.04	584.323	1257.7		549.724
42	NW_021838153.1:164517051-164532475	15424	164517051	164532475	212.25	236.373	608.46	544.423	961.956	1818.86	1332.69	1755.15		933.769
43	NW_021838153.1:164553351-164562675	9324	164553351	164562675	273.742	207.755	577.182	650.78	753.699	786.94	750.521	1277.26		659.735
44	NW_021838153.1:35442226-35482025	39799	35442226	35482025	2821.15	381.853	363.717	27.5	32.2	35.7	5.8	6.7		459.327
45	NW_021838153.1:60574276-60580225	5949	60574276	60580225	730.589	147.086	74.316	2	1.9	1	0	0		119.611
46	NW_021838153.1:98061176-98127925	66749	98061176	98127925	724.037	402.396	22.833	36.1	67.2	66.6	15.2	22.1		169.558
47	NW_021838153.1:98270226-98312100	41874	98270226	98312100	1724.6	444.785	170.507	52.1	79.6	71.7	15.2	17.2		321.961
48	NW_021838154.1:19205351-19208300	2949	19205351	19208300	322.039	615.231	1642.66	2244.83	712.635	1051.6	582.454	1746.59		1114.76
49	NW_021838399.1:4949401-4958950	9549	4949401	4958950	617.306	291.291	94.827	4.4	5.8	15.3	0.4	0.7		128.753
50	NW_021838410.1:11975676-11979175	3499	11975676	11979175	1061.52	288.413	127.008	1.6	2	0.1	0	0.1		185.093
51	NW_021838421.1:10057801-10064125	6324	10057801	10064125	428.036	253.03	33.383	5.3	6.2	12.8	0.2	1.7		92.5811
52	NW_021838421.1:9864426-9866675	2249	9864426	9866675	601.393	371.593	63.101	1.6	2.3	0.3	0.2	0.6		130.136
53	NW_021838465.1:42819901-42822300	2399	42819901	42822300	1501.47	34.755	298.872	118.422	57.74	181.7	585.898	489.318		408.522
54	NW_021838465.1:98472426-98481025	8599	98472426	98481025	196.601	80.605	229.081	219.061	282.021	1088.87	746.982	728.136		446.42
55	NW_021838576.1:13967076-13968200	1124	13967076	13968200	431.777	164.721	50.795	1.8	1.7	0.1	0	0		81.3616
56	NW_021838643.1:3293976-3310900	16924	3293976	3310900	692.674	345.563	71.836	10.2	11.4	16.2	0.6	0.5		143.622
57	NW_021838652.1:38601-92875	54274	38601	92875	1457.67	340.515	125.151	32.6	65.1	46.8	11	5.2		260.505
58	NW_021838687.1:54311951-54326650	14699	54311951	54326650	748.291	212.071	98.135	15.7	22.3	25.1	2.7	16.5		142.6
59	NW_021838687.1:54748476-54772725	24249	54748476	54772725	2126.96	582.51	267.164	29	39.2	25.1	8.5	6.9		385.666
60	NW_021838749.1:197976-199425	1449	197976	199425	1219.19	251.454	100.3	2.2	3.2	0.9	2.7	3.1		197.881
61	NW_021838798.1:12918976-12924725	5749	12918976	12924725	757.22	330.575	82.278	2.8	4.8	0.9	0.4	0.2		147.397
62	NW_021838798.1:48436401-48439050	2649	48436401	48439050	1712.75	390.27	214.908	2.8	2.4	0.1	0	0		290.403
63	NW_021838798.1:69240351-69250050	9699	69240351	69250050	292.185	176.914	29.201	3.4	6.6	5.3	3.1	1.9		64.825
64	NW_021838798.1:74516726-74528500	11774	74516726	74528500	1165.48	1299.17	4426.3	4643.8	3346.85	5688.64	3851.4	8437.91		4107.45
65	NW_021838798.1:74540876-74559950	19074	74540876	74559950	1189.89	1221.6	2954.94	3917.28	3249.63	5171.21	3645.88	7199.95		3568.8
66	NW_021838798.1:74561551-74564900	3349	74561551	74564900	400.685	473.562	1105.97	1671.94	1172.74	1552.75	1887.77	3986.59		1531.5
67	NW_021838900.1:156701-159775	3074	156701	159775	213.291	345.145	494.378	1204.17	533.859	349.931	246.736	1329.5		589.627
68	NW_021839130.1:39459176-39482325	23149	39459176	39482325	389.891	303.809	1236.59	1260.74	930.767	1938.04	2410.35	3738.19		1526.05
69	NW_021839130.1:50172476-50191450	18974	50172476	50191450	1052.79	553.066	1193.55	1296.03	867.706	1542.22	1560.59	2311.75		1297.21
70	NW_021839130.1:50811951-50841825	29874	50811951	50841825	1593.66	873.01	1575.84	2039.01	1230.72	2244.52	2012.14	2577.76		1768.33

## Sheet: TableS6_AeAlbo_Genic_piRCL
Table S6. Metatable of AeAlbo samples and cell lines, and additional tabs of top Genic and Intergenic piRNA clusters. Counts are reads per million.
	Gene	Locus	Ovary_OA	Testis_OA	Fcarc_OA	Mcarc_OA	Larv_OA	U4_4_cells	C7-10_cells	C636_cells_rep_3		Average
1	Trnaa-ugc_11	NW_021837711.1:42147959-42148041	4.108	5.767	18.249	6.533	151.083	7.895	39.823	12.654		30.764
2	Trnaa-ugc_5	NW_021837352.1:520-603	1.042	26.252	5.613	15.444	2.384	0.206	1.041	0.976		6.61975
3	Trnad-guc_39	NW_021837488.1:29417-29501	0.998	22.879	9.572	11.947	5.573	0.529	2.421	0.514		6.80413
4	Trnad-guc_55	NW_021838399.1:11228905-11228987	3.562	11.532	104.471	18.843	178.915	72.711	202.37	4.081		74.5606
5	Trnad-guc_57	NW_021838465.1:128465537-128465619	0.214	1.122	6.355	1.906	4.029	5.304	61.875	1.218		10.2529
6	Trnad-guc_71	NW_021838565.1:3228360-3228442	1.077	2.604	1.353	4.629	36.413	3.866	3.666	4.818		7.30325
7	Trnad-guc_76	NW_021838654.1:3669221-3669303	3.652	11.469	100.296	19.356	180.303	55.896	158.969	5.694		66.9544
8	Trnae-cuc_1	NW_021837134.1:839157-839239	7.023	22.364	151.825	42.066	249.501	60.093	70.277	20.25		77.9249
9	Trnae-cuc_11	NW_021838153.1:113395596-113395678	2.916	10.024	1.583	19.569	72.22	6.022	0.833	10.36		15.4409
10	Trnae-cuc_16	NW_021838465.1:78723452-78723534	7.033	22.123	152.497	41.637	250.139	60.837	73.455	19.998		78.4649
11	Trnae-cuc_31	NW_021838720.1:31875-31957	1.051	2.178	2.076	5.314	17.178	2.27	2.118	4.241		4.55325
12	Trnae-uuc_2	NW_021837045.1:37865715-37865797	3.613	2.931	1.439	2.839	10.167	2.379	6.066	39.161		8.57437
13	Trnae-uuc_20	NW_021837488.1:29317-29400	0.538	20.301	9.356	10.322	2.472	0.137	0.208	0.181		5.43937
14	Trnae-uuc_27	NW_021838153.1:122520566-122520649	4.932	8.814	126.009	32.594	144.201	53.789	66.513	7.362		55.5267
15	Trnag-gcc_11	NW_021837045.1:125768778-125768859	0.205	1.125	1.077	1.352	15.263	2.608	0.471	2.44		3.06763
16	Trnag-gcc_21	NW_021837045.1:126644470-126644551	0.227	1.497	0.993	1.465	15.877	2.832	0.632	2.26		3.22288
17	Trnag-gcc_22	NW_021837045.1:126662047-126662128	0.205	1.372	1.005	1.413	15.787	2.694	0.329	2.549		3.16925
18	Trnag-gcc_23	NW_021837045.1:126772597-126772678	0.698	5.007	0.864	4.289	42.582	3.516	0.368	1.839		7.39537
19	Trnag-gcc_33	NW_021838460.1:400217-400298	0.991	7.296	1.023	6.207	46.692	4.416	1.104	2.352		8.76013
20	Trnag-gcc_4	NW_021837045.1:124900721-124900802	0.197	2.349	5.457	16.483	6.227	1.399	2.153	7.679		5.243
21	Trnag-gcc_41	NW_021838516.1:65383-65464	0.205	1.144	1.005	1.588	15.653	2.727	0.753	2.834		3.23862
22	Trnag-gcc_43	NW_021838516.1:598465-598546	0.197	2.349	5.457	16.483	6.227	1.399	2.153	7.679		5.243
23	Trnag-ucc_19	NW_021838754.1:3539213-3539295	0.189	0.274	0	1.047	43.451	0.47	0.014	1.054		5.81238
24	Trnag-ucc_28	NW_021839130.1:51451881-51451963	0	0.249	0	0.035	11.069	0.176	0	1.508		1.62963
25	Trnah-gug_17	NW_021837483.1:26711-26794	0.744	30.827	13.803	37	4.291	0.808	3.593	1.31		11.547
26	Trnah-gug_37	NW_021838410.1:10611444-10611526	12.996	18.24	40.014	20.697	45.752	30.96	4.374	3.499		22.0665
27	Trnai-gau	NW_021837352.1:616-700	0.449	12.308	1.727	2.329	1.276	0.117	0.417	0.012		2.32938
28	Trnak-cuu_105	NW_021839219.1:1516045-1516128	30.822	14.44	0.864	0.282	0.205	0	0	0		5.82662
29	Trnak-uuu_1	NW_021837585.1:5629-5712	0.305	0.737	0.936	1.453	16.795	0.764	0.667	0.362		2.75238
30	Trnak-uuu_10	NW_021839130.1:30022404-30022487	5.042	41.935	9.116	20.562	81.783	54.949	8.227	153.294		46.8635
31	Trnal-cag_12	NW_021837045.1:125774444-125774537	4.424	4.008	1.151	12.696	1.824	0.356	1.187	1.828		3.43425
32	Trnam-cau_18	NW_021837299.1:30706-30790	19.545	50.368	29.974	49.769	13.455	1.469	3.385	1.466		21.1789
33	Trnan-guu_38	NW_021838787.1:1192202-1192286	0.676	2.406	4.462	12.93	21.045	3.977	5.2	5.46		7.0195
34	Trnap-cgg_16	NW_021838516.1:86203-86285	0.292	0.725	2.119	1.846	122.293	8.13	0.682	1.669		17.2195
35	Trnap-cgg_3	NW_021837045.1:126611545-126611627	0.15	0.48	0.008	0.506	20.628	1.089	0.235	0.677		2.97162
36	Trnap-cgg_5	NW_021837363.1:34540-34624	0.705	24.208	4.759	15.924	2.422	0.822	0.929	0.454		6.27787
37	Trnap-ugg	NW_021837045.1:124924754-124924836	2.591	6.984	3.742	20.221	10.878	3.936	17.288	50.266		14.4883
38	Trnaq-cug_1	NW_021837287.1:36155-36237	0.082	0.232	0.432	0.424	31.48	0.409	0.59	0.24		4.23613
39	Trnaq-cug_16	NW_021838410.1:10733005-10733087	0.765	2.24	6.644	6.753	36.217	8.352	4.251	3.339		8.57013
40	Trnaq-cug_9	NW_021838410.1:7393442-7393524	0.784	2.722	6.145	6.665	22.188	5.213	4.502	3.061		6.41
41	Trnaq-uug_8	NW_021838410.1:7402332-7402414	0.926	3.138	6.759	6.977	23.636	6.484	4.588	4.258		7.09575
42	Trnas-gga	NW_021838389.1:778759-778851	1.406	3.352	9.351	18.451	36.858	6.087	20.704	25.461		15.2088
43	Trnat-agu_20	NW_021837045.1:71610697-71610781	1.965	2.6	3.454	0.509	46.957	0	9.735	4.363		8.69787
44	Trnat-agu_24	NW_021837045.1:73417441-73417525	1.965	2.6	3.454	0.509	46.957	0	9.735	4.363		8.69787
45	Trnav-uac_11	NW_021838576.1:83274833-83274916	1.432	4.594	5.086	7.176	11.32	5.209	14.337	15.277		8.05387
46	XM_019671766.2	NW_021837045.1:149681827-149682489	0.062	0.129	0.411	1.134	103.298	0.034	0	0.025		13.1366
47	XM_019671899.2	NW_021838576.1:117013670-117015090	84.233	119.726	11.083	0.247	0.873	0	0	0		27.0203
48	XM_019672190.2	NW_021838465.1:54241570-54242548	0.016	0.229	0	0	101.317	0	0	0		12.6952
49	XM_019673242.2	NW_021838576.1:19292019-19296301	4.328	7.666	1.727	3.247	698.041	0.182	0	0.251		89.4303
50	XM_019673351.2	NW_021837045.1:130291744-130292869	1.436	1.608	6.189	4.54	25.242	2.631	5.693	6.534		6.73412
51	XM_019674125.2	NW_021837931.1:29960191-29962526	0.086	1.049	0.785	1.281	190.036	0.175	0	0		24.1765
52	XM_019674607.2	NW_021838577.1:1539003-1540575	0.003	0.208	0.144	0.01	0	60.786	0.715	0.151		7.75213
53	XM_019675318.2	NW_021838798.1:48356539-48357171	0	0.281	0.144	0.035	109.297	0	0	0		13.7196
54	XM_019676743.2	NW_021838465.1:84714383-84716174	76.316	899.205	338.288	666.559	198.496	0.059	0.042	0.012		272.372
55	XM_019677123.2	NW_021838576.1:119613984-119614549	152.622	49.055	16.929	0.367	0.019	0	0	0		27.374
56	XM_019678758.2	NW_021838433.1:228537-235199	22.769	47.9	89.733	147.757	82.619	85.306	29.803	236.782		92.8336
57	XM_019679248.2	NW_021838617.1:211640-212584	0.084	0.437	0	0	360.175	0	0	0		45.087
58	XM_019681791.2	NW_021838746.1:169747-172055	0.113	0.748	0.72	0.635	303.426	0.061	0	0.006		38.2136
59	XM_019681875.2	NW_021838031.1:30542-36732	5.158	4.316	5.234	6.709	93.387	9.392	8.859	20.389		19.1805
60	XM_019687608.2	NW_021838577.1:2325870-2327454	0	0.07	0.432	0.035	0	64.623	1.236	0.093		8.31113
61	XM_019688087.2	NW_021838576.1:78169185-78169881	0.212	0.094	0.144	0.212	0.403	0.166	14.282	117.652		16.6456
62	XM_019688341.2	NW_021837045.1:138950537-139002611	150.829	360.708	2031.22	876.714	1984.43	1167.65	640.658	2140.42		1169.08
63	XM_019689655.2	NW_021837045.1:39826894-39828520	0.549	0.717	0.144	0.394	0.336	0.277	2.499	43.128		6.0055
64	XM_019690076.2	NW_021837822.1:23832642-23833843	0	0	0.576	0.024	0.134	170.31	0	0.522		21.4458
65	XM_019690907.2	NW_021838898.1:1169689-1171593	4.627	4.385	15.65	12.634	56.279	11.911	28.619	9.585		17.9613
66	XM_019691365.2	NW_021837378.1:43964251-44006407	30.26	36.968	4.406	0.917	2.855	1.239	78.377	928.015		135.38
67	XM_019692247.2	NW_021838153.1:104410773-104414125	7.882	7.812	10.051	5.789	224.048	9.48	4.825	31.268		37.6444
68	XM_019694868.2	NW_021838711.1:243025-244928	0.037	0.13	0	0	0.003	0.081	0.069	31.813		4.01662
69	XM_019695388.2	NW_021838943.1:1125233-1125949	0.045	0.047	0	0.035	0.328	0.034	14.18	0.251		1.865
70	XM_019696184.2	NW_021838153.1:147691030-147695078	45.614	18.599	156.6	55.908	39.238	29.098	29.98	34.938		51.2469
71	XM_019696298.2	NW_021838488.1:6775144-6779467	0.384	0.149	1.679	0.106	0.435	188.914	0	0.058		23.9656
72	XM_019697423.2	NW_021837294.1:25305-26464	0.701	0.234	0.72	0.035	0.403	29.051	0	0.551		3.96187
73	XM_019697577.2	NW_021837987.1:101388-103002	1.413	1.855	6.909	1.812	49.382	18.9	39.109	8.81		16.0237
74	XM_019698674.2	NW_021838576.1:76057164-76057859	0.212	0.094	0.144	0.212	0.403	0.166	14.282	117.942		16.6819
75	XM_019699032.2	NW_021838153.1:160156910-160157832	0.112	0.187	0.288	0.071	2.174	0.176	0.208	20.53		2.96825
76	XM_019699801.2	NW_021837489.1:2315881-2321862	516.448	782.19	2966.76	3015.12	2555.74	2936.06	879.324	3308.35		2120
77	XM_019699873.2	NW_021837489.1:12673405-12674870	5.526	6.498	29.363	14.001	71.173	10.766	14.65	24.589		22.0708
78	XM_019699952.2	NW_021838798.1:74512080-74513153	1.578	2.557	1.439	0.294	0.806	1.418	1.041	162.025		21.3948
79	XM_019700787.2	NW_021838488.1:6745018-6749505	0.36	0.076	1.442	0.224	0.501	93.266	0.009	0.182		12.0075
80	XM_019701927.2	NW_021838465.1:84683160-84685178	7.244	41.366	11.172	19.006	7.019	0	0	0		10.7259
81	XM_019701929.2	NW_021838465.1:84698359-84700185	270.275	2061.74	532.326	718.785	176.945	0.059	0	0		470.016
82	XM_019703071.2	NW_021838687.1:3389832-3392502	2.578	1.964	3.886	3.235	45.215	1.333	2.118	2.74		7.88363
83	XM_019705448.2	NW_021837045.1:38753268-38755007	0.535	0.67	0.144	0.466	0.336	0.323	2.916	46.492		6.48525
84	XM_019705574.2	NW_021837378.1:8414279-8420913	5.862	4.976	8.103	7.647	109.38	11.955	29.549	21.273		24.8431
85	XM_019705941.2	NW_021837378.1:29226791-29227602	0.449	0.083	0.864	0.071	1.074	0.176	1.25	203.239		25.9008
86	XM_019706059.2	NW_021838909.1:7344267-7345125	0.091	0.249	0	0.094	163.216	0	0	0		20.4563
87	XM_019706170.2	NW_021838388.1:11010171-11011884	0.405	0.795	1.727	0.253	1.679	75.442	10.079	5.379		11.9699
88	XM_019706627.2	NW_021839219.1:1373676-1383529	187.9	105.182	26.196	0.568	4.872	0.007	0.023	0.041		40.5986
89	XM_019706768.2	NW_021838909.1:6628046-6628576	0	0.125	0	0	83.61	0	0	0		10.4669
90	XM_019706770.2	NW_021838909.1:6628958-6629502	0.071	0.237	0	0.024	129.825	0	0	0		16.2696
91	XM_019706797.2	NW_021838909.1:7411876-7412451	0.035	0.14	0	0.024	161.907	0	0	0		20.2633
92	XM_019706831.2	NW_021838909.1:6590155-6590825	0.047	0.187	0.096	0.094	161.236	0	0	0		20.2075
93	XM_019706833.2	NW_021838909.1:7399172-7399755	0.009	0.042	0	0	35.333	0	0	0		4.423
94	XM_019707911.2	NW_021838443.1:6332620-6339775	5.428	14.376	10.379	7.819	200.031	10.035	19.871	9.553		34.6865
95	XM_019709296.2	NW_021838438.1:426722-429377	4.686	1.629	62.419	11.614	1.414	80.631	150.857	89.221		50.3089
96	XM_019709767.2	NW_021837700.1:1100271-1100867	0.088	0.129	0.411	1.134	105.693	0.034	0	0.025		13.4393
97	XM_019710000.2	NW_021838388.1:11515918-11517644	0.326	0.795	1.727	0.112	1.544	75.207	9.662	3.291		11.583
98	XM_020076285.2	NW_021837045.1:161392533-161393874	0.635	1.811	2.015	3.882	27.845	0.822	0.417	2.088		4.93938
99	XM_020077037.2	NW_021838665.1:2674724-2676813	0.011	0.08	0.257	0.029	0.224	103.07	0	0.003		12.9592
100	XM_020077038.2	NW_021838810.1:3659879-3661889	0.003	0	1.768	0.102	0.974	168.071	0	0.022		21.3675
101	XM_020077043.2	NW_021838810.1:2578705-2580028	0.127	0.951	5.885	3.59	12.803	104.057	0	0.025		15.9298
102	XM_020077491.2	NW_021839130.1:43858005-43859239	0.859	2.38	0.864	2.329	20.833	1.471	2.552	0.406		3.96175
103	XM_029852022.1	NW_021838621.1:5392197-5477714	5.069	38.61	494.298	1574.33	29.847	1.169	0.172	0.361		267.982
104	XM_029852448.1	NW_021838665.1:2813503-2815500	0.08	0.041	4.702	0.085	2.545	527.053	0	0.109		66.8269
105	XM_029853146.1	NW_021838687.1:59356446-59374478	13.354	24.19	3.94	0.524	4.551	277.556	3.99	19.278		43.4229
106	XM_029853565.1	NW_021838687.1:28172614-28174234	0.06	0.031	0	0	0	0.02	0.069	31.797		3.99713
107	XM_029853592.1	NW_021838687.1:59380416-59382032	0.728	0.591	1.027	0.154	1.563	137.373	1.873	5.617		18.6157
108	XM_029853694.1	NW_021838687.1:50878235-50882978	175.283	43.81	15.395	0.323	0.147	0.104	0.035	0.003		29.3875
109	XM_029853843.1	NW_021838699.1:4317283-4319680	4.074	2.511	8.348	5.402	37.184	4.788	21.218	6.774		11.2874
110	XM_029853859.1	NW_021838699.1:5148999-5151322	4.089	2.168	8.924	5.384	42.731	4.553	20.593	6.455		11.8621
111	XM_029854254.1	NW_021837046.1:38291238-38291614	332.352	174.338	40.014	1.482	0.537	0	0	0		68.5904
112	XM_029854301.1	NW_021838753.1:224650-225848	147.181	43.674	18.711	0.176	0.246	0	0	0		26.2485
113	XM_029854317.1	NW_021838754.1:3618915-3620264	0.701	0.368	0.009	0.544	0.56	8.842	30.203	3.054		5.53513
114	XM_029854337.1	NW_021837046.1:47788791-47789807	72.634	132.878	10.112	0.141	0.403	0	0.069	0		27.0296
115	XM_029854652.1	NW_021838798.1:88021079-88022435	0.198	0.159	0	0.282	0.492	0.059	7.811	79.409		11.0513
116	XM_029855294.1	NW_021838798.1:57721656-57727425	0.818	1.694	1.103	0.578	18.098	65.446	42.714	330.233		57.5855
117	XM_029855410.1	NW_021838798.1:48742762-48746016	10.525	10.461	21.32	21.348	15.282	16.525	9.656	79.159		23.0345
118	XM_029855433.1	NW_021838798.1:57366115-57367924	0.385	2.912	4.675	3.892	58.714	0.35	0.295	7.563		9.84825
119	XM_029855502.1	NW_021838798.1:48376470-48377177	0	0.062	0.288	0	81.413	0	0	0		10.2204
120	XM_029855684.1	NW_021838798.1:42149732-42153678	0.213	3.443	135.606	11.275	35.593	4.048	1.287	4.283		24.4685
121	XM_029855773.1	NW_021838798.1:57661979-57663573	0.071	0.11	0.162	0.047	5.877	26.586	1.076	45.09		9.87738
122	XM_029855802.1	NW_021838798.1:2515057-2528449	0.543	0.256	2.892	0.213	4.326	279.322	5.266	0.782		36.7
123	XM_029855803.1	NW_021838798.1:2068788-2079917	0.318	0.05	3.215	0.139	6.936	263.403	5.399	0.725		35.0231
124	XM_029856119.1	NW_021838799.1:2056428-2057952	6.385	2.698	27.757	6.987	35.76	11.343	52.169	25.387		21.0607
125	XM_029856120.1	NW_021838799.1:2056428-2057885	6.385	2.697	27.757	6.952	35.692	11.343	52.169	25.387		21.0478
126	XM_029856176.1	NW_021838810.1:43951-45695	0.04	0.034	0.513	0.028	0.284	170.181	0	0.017		21.3871
127	XM_029856188.1	NW_021838810.1:2702541-2704511	0.003	0	1.768	0.102	0.974	168.042	0	0.022		21.3639
128	XM_029856191.1	NW_021838810.1:2446498-2448448	0.05	0	0.435	0.012	0.09	177.52	0	0.017		22.2655
129	XM_029856207.1	NW_021838810.1:2586483-2588343	0.044	0	0.401	0.012	0.144	128.239	0	0.003		16.1054
130	XM_029856694.1	NW_021838879.1:260185-261757	1.732	1.143	5.383	3.098	32.257	1.936	8.388	4.993		7.36625
131	XM_029856812.1	NW_021838900.1:56555-58943	2.314	3.203	2.985	2.516	37.445	79.098	3.124	3.721		16.8008
132	XM_029857112.1	NW_021838909.1:7410989-7411520	0	0.125	0	0	71.275	0	0.014	0		8.92675
133	XM_029857299.1	NW_021838909.1:10177157-10177682	0.018	0.101	0	0	65.53	0	0	0		8.20613
134	XM_029857368.1	NW_021838909.1:9262169-9263486	200.846	233.836	15.689	0.776	2.135	0.088	0	0.193		56.6954
135	XM_029857494.1	NW_021838909.1:10117980-10118839	0.065	0.187	0.096	0.094	162.041	0	0	0		20.3104
136	XM_029858181.1	NW_021838943.1:2350519-2351397	0.045	0.047	0	0.035	0.328	0.034	14.18	0.251		1.865
137	XM_029860825.1	NW_021837045.1:180261404-180262789	1.866	2.942	55.273	13.745	11	41.411	48.414	19.059		24.2138
138	XM_029860868.1	NW_021837058.1:1735809-1738536	75.072	32.995	12.586	0.376	0.129	0	0.082	0		15.155
139	XM_029860932.1	NW_021837045.1:180500144-180504944	7.153	2.076	87.612	13.415	0.69	106.135	164.018	140.321		65.1775
140	XM_029861468.1	NW_021837156.1:57216112-57226416	190.555	74.717	177.757	92.25	100.848	138.843	191.006	182.524		143.562
141	XM_029861749.1	NW_021837156.1:31099334-31101389	2.138	0.518	0.585	0.018	0.269	44.817	0	0.116		6.05762
142	XM_029862885.1	NW_021837045.1:133395367-133397676	1469.38	806.586	161.897	3.383	4.734	0.019	0	0		305.749
143	XM_029862989.1	NW_021837045.1:135350452-135358411	91.623	94.994	145.669	208.332	113.677	54.546	40.761	58.377		100.997
144	XM_029863939.1	NW_021837378.1:46733886-46736643	220.732	126.839	26.021	0.874	0.739	0	0	0		46.9006
145	XM_029865004.1	NW_021837489.1:45300052-45301007	108.512	122.195	22.511	0.176	0.439	0	0	0		31.7291
146	XM_029865035.1	NW_021837045.1:7298600-7345945	143.373	138.671	680.75	763.854	793.07	3072.51	1183.17	3246.28		1252.71
147	XM_029865287.1	NW_021837045.1:8693282-8750152	112.984	93.607	532.121	520.555	556.873	2100.57	1253.66	3857.95		1128.54
148	XM_029865665.1	NW_021837489.1:1725654-1727925	128.661	74.51	88.706	60.443	76.065	114.071	58.952	151.034		94.0553
149	XM_029865670.1	NW_021837489.1:3857599-3868090	28.388	16.293	9.715	24.272	25.534	287.844	284.23	948.352		203.079
150	XM_029865749.1	NW_021837045.1:13378165-13380793	2.788	2.291	4.505	6.323	27.969	21.442	16.111	49.667		16.387
151	XM_029866674.1	NW_021837601.1:228359-242562	0.21	0.141	3.088	0.33	5.333	284.48	5.322	0.785		37.4611
152	XM_029867177.1	NW_021837711.1:12909829-12912036	69.896	76.473	7.82	0.084	0.336	0.006	0	0.01		19.3281
153	XM_029867958.1	NW_021837822.1:234814-237458	1.731	1.192	0.489	0.024	0.035	41.147	100.12	483.043		78.4726
154	XM_029868302.1	NW_021837931.1:3035584-3039980	72.815	25.022	9.74	255.072	7.137	2.611	0.798	2.76		46.9944
155	XM_029868494.1	NW_021837931.1:18697250-18697791	0.136	0.053	0.284	0.015	0.126	47.647	0.407	0.383		6.13137
156	XM_029868513.1	NW_021837931.1:18958896-18962325	0.626	0.313	0.594	0.032	0.556	52.389	1.403	2.932		7.35563
157	XM_029869305.1	NW_021838098.1:164230-164714	82.229	54.261	7.548	0.221	0.116	0	0	0		18.0469
158	XM_029869760.1	NW_021838153.1:20667038-20667958	0.178	0.312	0	0.141	0.134	0.352	0.833	14.875		2.10312
159	XM_029870321.1	NW_021838153.1:70647369-70656253	35.599	21	100.812	67.266	305.811	102.084	174.718	70.091		109.673
160	XM_029870749.1	NW_021838153.1:100193933-100195485	6.358	2.515	27.181	6.846	33.487	11.167	42.067	22.686		19.0384
161	XM_029870890.1	NW_021838153.1:112950183-112994896	8.823	17.952	3.145	1.879	1.044	43.999	1.155	970.334		131.041
162	XM_029871569.1	NW_021838153.1:163931814-163935213	0.09	0.374	0.288	1.347	4.703	7.578	11.248	85.006		13.8293
163	XM_029872035.1	NW_021838154.1:18298058-18299662	1.518	2.294	6.621	1.882	52.336	18.9	38.9	8.733		16.398
164	XM_029873612.1	NW_021837045.1:113669819-113674316	53.967	80.156	127.539	96.86	183.417	1.209	4.166	8.674		69.4985
165	XM_029873810.1	NW_021838410.1:9370581-9371554	123.809	148.902	10.843	0.176	0.705	0	0	0		35.5544
166	XM_029873896.1	NW_021838410.1:8912273-8913137	69.703	60.037	6.113	0.349	0.345	0	0	0		17.0684
167	XM_029874418.1	NW_021838438.1:491719-493364	2.569	2.682	25.022	17.328	2.677	86.373	201.45	47.87		48.2464
168	XM_029874439.1	NW_021838441.1:613335-632179	567.839	163.433	70.159	0.688	1.401	0.392	0.104	0.003		100.502
169	XM_029874769.1	NW_021838454.1:10202733-10204471	1.15	0.839	0.297	0.014	0.022	20.39	65.94	313.703		50.2944
170	XM_029875119.1	NW_021838465.1:30911548-30922439	4.058	15.374	0.929	0.061	0.042	0.087	0.111	214.2		29.3577
171	XM_029875274.1	NW_021838465.1:42887802-42889298	1.234	3.263	4.174	3.188	69.071	8.974	2.361	1.305		11.6963
172	XM_029876228.1	NW_021838465.1:101881452-101891921	0.528	1.23	0.929	0.595	17.936	70.603	42.991	332.735		58.4434
173	XM_029876562.1	NW_021838466.1:8221448-8224707	0.42	5.329	21.727	2.305	52.767	0	0	0		10.3185
174	XM_029876717.1	NW_021838477.1:2715068-2716636	0.025	0.009	1.195	0.112	0	33.701	7.922	0.434		5.42475
175	XM_029876905.1	NW_021838488.1:6829139-6830064	0.078	0	1.295	0.012	0	132.621	0	0		16.7508
176	XM_029878323.1	NW_021838565.1:191202-192729	2.021	2.651	52.223	14.019	11.74	40.394	139.329	56.167		39.818
177	XM_029878642.1	NW_021838576.1:51738010-51754263	14.747	16.823	2.367	0.05	0.272	0.059	40.512	292.224		45.8817
178	XM_029878752.1	NW_021838576.1:119197387-119197952	152.622	49.055	16.929	0.367	0.019	0	0	0		27.374
179	XM_029878754.1	NW_021838576.1:119250380-119250888	55.11	28.882	7.672	0.024	0.045	0	0	0		11.4666
180	XM_029879060.1	NW_021837045.1:180310245-180311604	2.559	1.632	39.314	10.026	4.062	96.512	246.927	532.715		116.718
181	XM_029879724.1	NW_021838576.1:78153600-78155578	1.106	0.908	0.237	0.01	0.029	23.319	59.354	296.647		47.7013
182	XM_029880377.1	NW_021838588.1:1485828-1488394	6.206	9.422	86.984	39.159	38.485	152.938	295.783	237.995		108.371
183	XR_002127535.2	NW_021838222.1:972863-976372	72.98	25.209	9.74	255.143	7.387	2.712	1.007	2.905		47.1354
184	XR_002129913.3	NW_021838909.1:45650432-45650934	170.694	210.734	361.082	719.35	416.309	599.757	105.903	1366.1		493.741
185	XR_002201812.2	NW_021838465.1:108935511-108937274	6.668	2.225	13.931	9.035	16.227	13.467	54.991	8.364		15.6135
186	XR_002201993.2	NW_021838909.1:46383134-46383524	170.809	209.799	364.057	718.927	417.854	604.883	105.591	1375.36		495.91
187	XR_003891753.1	NW_021838602.1:312861-319546	58.814	34.435	70.801	91.255	93.913	82.439	295.192	357.057		135.488
188	XR_003891754.1	NW_021838602.1:325328-332911	48.98	64.994	188.74	164.463	142.699	100.629	31.723	58.521		100.094
189	XR_003891766.1	NW_021838606.1:283841-301743	25.091	41.767	52.399	64.706	336.607	47.047	72.899	434.509		134.378
190	XR_003891811.1	NW_021837045.1:8981490-8981695	0.036	2.427	0.058	0.085	11.249	0.012	0.125	0.012		1.7505
191	XR_003891835.1	NW_021837045.1:101132174-101132254	0.718	1.497	8.732	4.041	5.887	5.312	16.093	4.946		5.90325
192	XR_003891846.1	NW_021837045.1:7559833-7560038	0.036	2.396	0.058	0.085	11.249	0.012	0.125	0.012		1.74663
193	XR_003891847.1	NW_021837045.1:8954442-8954647	0.036	2.427	0.058	0.085	11.249	0.012	0.125	0.012		1.7505
194	XR_003892750.1	NW_021838798.1:46649477-46650601	0.308	6.091	5.469	14.681	1.88	46.744	246.581	137.107		57.3576
195	XR_003892970.1	NW_021838843.1:784345-790946	47.914	18.914	21.254	5.549	26.607	26.581	21.114	123.139		36.384
196	XR_003893419.1	NW_021838909.1:33275561-33275737	0.159	0	0.864	0.282	10.671	1.527	0	0.638		1.76762
197	XR_003893772.1	NW_021839020.1:69670199-69672997	15.867	8.433	39.059	19.929	46.725	56.705	50.567	64.051		37.667
198	XR_003893773.1	NW_021839020.1:69664376-69670205	15.403	7.517	54.964	19.38	99.54	30.465	50.757	52.699		41.3406
199	XR_003893907.1	NW_021839020.1:68611515-68616144	15.836	8.266	53.514	18.128	101.42	23.416	36.612	48.293		38.1856
200	XR_003894364.1	NW_021837045.1:180347789-180348955	1.782	2.944	23.245	11.008	12.406	96.591	263.117	277.021		86.0143
201	XR_003894392.1	NW_021837045.1:180542568-180544325	2.617	2.844	44.544	12.104	12.935	128.042	340.753	293.366		104.651
202	XR_003894410.1	NW_021839236.1:61932-62737	0.008	0.017	0.108	0	0.034	55.995	0	0		7.02025
203	XR_003894510.1	NW_021837134.1:997429-998152	66.877	62.645	6.189	0.059	0.336	0	0	0.01		17.0145
204	XR_003894579.1	NW_021837156.1:54143214-54143804	17.836	6.173	72.487	38.619	62.969	273.831	292.335	120.611		110.608
205	XR_003894584.1	NW_021837156.1:57036989-57037595	16.122	5.518	72.487	35.62	59.208	268.269	287.684	113.4		107.288
206	XR_003894610.1	NW_021837156.1:7940099-7942086	70.696	145.583	454.068	648.672	672.998	1573.54	622.776	767.653		619.498
207	XR_003894840.1	NW_021837267.1:2321537-2352656	1082.74	2061.66	5281.44	8650.89	4330.43	7106.8	1631.12	10945.5		5136.33
208	XR_003894842.1	NW_021837267.1:2366401-2367537	236.314	592.844	1073.02	2457.06	826.113	1120.79	211.597	2241.07		1094.85
209	XR_003894912.1	NW_021837267.1:24689460-24691991	7.546	3.192	11.383	12.802	108.869	23.144	39.017	38.2		30.5191
210	XR_003894952.1	NW_021837267.1:43552871-43553663	0.106	0.569	0	0.141	1.477	1.836	1.25	30.418		4.47462
211	XR_003894959.1	NW_021837267.1:46561536-46566983	8.277	6.486	2.866	0.052	0.43	222.004	0.056	0.06		30.0289
212	XR_003895192.1	NW_021837378.1:52765345-52770825	8.598	6.597	3.067	0.063	0.43	222.274	0.056	0.06		30.1431
213	XR_003895248.1	NW_021837419.1:11046-12843	2.929	72.274	42.785	48.861	17.978	4.712	5.507	4.261		24.9134
214	XR_003895249.1	NW_021837419.1:4496-6293	2.929	72.274	42.785	48.861	17.978	4.712	5.507	4.261		24.9134
215	XR_003895250.1	NW_021837419.1:17620-19417	2.929	72.274	42.785	48.861	17.978	4.712	5.507	4.261		24.9134
216	XR_003895251.1	NW_021837419.1:24196-25993	2.929	72.274	42.785	48.861	17.978	4.712	5.507	4.261		24.9134
217	XR_003895252.1	NW_021837419.1:30771-32568	2.929	72.274	42.785	48.861	17.978	4.712	5.507	4.261		24.9134
218	XR_003895253.1	NW_021837419.1:41249-43044	2.909	71.82	41.972	48.402	17.83	4.613	5.507	4.231		24.6605
219	XR_003895272.1	NW_021837434.1:399176-399309	0.806	3.492	2.735	0.918	40.894	2.046	2.291	6.512		7.46175
220	XR_003895367.1	NW_021837489.1:1686845-1689833	202.918	112.421	132.18	120.621	259.142	274.025	91.684	104.114		162.138
221	XR_003895369.1	NW_021837489.1:2325067-2332237	179.714	189.882	737.746	516.299	1198.26	1041.41	651.221	1746.16		782.587
222	XR_003895371.1	NW_021837489.1:2338861-2339904	274.433	311.972	598.833	714.752	752.787	865.297	511.823	846.586		609.56
223	XR_003895475.1	NW_021837489.1:39604534-39604703	0.438	0.662	1.871	1.776	18.769	0.862	0.625	1.904		3.36337
224	XR_003895530.1	NW_021837577.1:517-2313	2.582	65.305	38.149	43.675	14.599	3.945	4.854	3.932		22.1301
225	XR_003895531.1	NW_021837577.1:13646-15439	2.821	68.697	39.683	46.576	17.162	4.534	5.396	4.05		23.6149
226	XR_003895532.1	NW_021837577.1:7080-8877	2.68	65.496	40.115	43.733	15	4.393	5.182	4.007		22.5757
227	XR_003895533.1	NW_021837577.1:20206-22022	2.751	67.652	39.077	45.539	16.723	4.094	5.215	3.993		23.1305
228	XR_003895665.1	NW_021837600.1:41714918-41722330	1277.28	490.585	202.423	43.024	83.574	275.803	151.736	275.523		349.993
229	XR_003895741.1	NW_021837711.1:4613150-4618690	9.156	6.906	2.672	0.109	0.358	244.725	0	0.029		32.9944
230	XR_003895958.1	NW_021837800.1:335026-335200	0.044	0.382	0.255	0.265	12.8	0.061	0.064	0.274		1.76812
231	XR_003896356.1	NW_021837931.1:18946984-18947113	1.269	39.768	1.295	10.002	10.653	0.678	2.777	6.834		9.1595
232	XR_003896387.1	NW_021837998.1:297108-311323	403.858	393.835	1145.38	1229.38	1094.99	1617.41	1411.56	2494.05		1223.81
233	XR_003896388.1	NW_021837998.1:436166-452708	188.559	149.25	219.243	245.482	518.28	187.38	393.432	895.79		349.677
234	XR_003896654.1	NW_021838153.1:77998344-77998769	6.218	7.161	50.089	38.016	22.428	40.507	27.807	36.014		28.53
235	XR_003896810.1	NW_021838153.1:164534728-164550037	420.254	362.485	1047.05	1006.99	1069.94	1139.33	1250.06	1778.83		1009.37
236	XR_003896992.1	NW_021838153.1:16131499-16131673	0.044	0.351	0.303	0.265	12.831	0.07	0.064	0.274		1.77525
237	XR_003896993.1	NW_021838153.1:18404796-18404970	0.044	0.351	0.303	0.265	12.831	0.07	0.064	0.274		1.77525
238	XR_003896994.1	NW_021838153.1:18482695-18482869	0.044	0.372	0.303	0.265	12.831	0.128	0.064	0.274		1.78512
239	XR_003897064.1	NW_021837045.1:87773279-87782377	4.038	3.709	1.502	0.045	0.093	150.988	0.007	0.044		20.0533
240	XR_003897082.1	NW_021838154.1:19092898-19095144	1.825	2.393	2.553	2.037	34.024	78.741	3.262	4.477		16.164
241	XR_003897695.1	NW_021838421.1:10330363-10330568	0.087	2.396	0.058	0.085	11.317	0.012	0.125	0.012		1.7615
242	XR_003897792.1	NW_021838438.1:320791-333305	6.34	13.786	51.587	43.031	34.617	191.335	1651.59	524.881		314.646
243	XR_003897827.1	NW_021838443.1:2933041-2933943	44.114	32.424	5.422	0.365	0.425	0.007	0	0		10.3446
244	XR_003897953.1	NW_021838465.1:6815988-6818191	0.264	0.488	0.144	0.447	1.49	1.057	1.701	34.75		5.04263
245	XR_003898063.1	NW_021837045.1:135304865-135311140	64.432	34.835	57.963	35.874	83.835	1064.53	123.345	34.31		187.391
246	XR_003898084.1	NW_021837045.1:137180171-137188275	393.047	287.459	922.481	778.198	790.972	2427.34	358.25	1436.94		924.336
247	XR_003898099.1	NW_021837045.1:137380665-137390396	61.311	28.82	73.406	133.285	120.287	103.283	103.764	254.174		109.791
248	XR_003898778.1	NW_021838560.1:13245-14606	4.08	3.326	10.255	8.386	16.036	6.082	3.962	32.08		10.5259
249	XR_003898779.1	NW_021838560.1:11961-12618	0.622	0.307	7.029	0.996	14.901	29.393	7.123	5.756		8.26588
250	XR_003898839.1	NW_021838576.1:11998594-11999782	0.125	0.044	0.192	0.059	0.045	17.419	22.501	85.106		15.6864
251	XR_003898845.1	NW_021838576.1:17377087-17379482	56.726	31.863	4.468	0.071	0.201	0.117	0	0.061		11.6884
252	XR_003899150.1	NW_021838576.1:80069016-80074023	7.023	5.352	2.683	0.047	0.38	216.048	0.043	0.06		28.9545
253	XR_003899230.1	NW_021838576.1:120371663-120379451	115.971	95.606	223.205	201.048	398.396	432.098	185.864	343.776		249.496
254	XR_003899352.1	NW_021838576.1:110653105-110653234	0.74	22.754	1.097	7.392	58.037	0.78	1.93	3.218		11.9935
255	XR_003899353.1	NW_021838576.1:110653425-110653554	0.74	22.754	1.097	7.392	58.037	0.78	1.93	3.218		11.9935
256	XR_003899354.1	NW_021838576.1:110653821-110653950	0.74	22.754	1.097	7.392	58.037	0.78	1.93	3.218		11.9935
257	XR_003899356.1	NW_021838576.1:110654594-110654723	0.74	22.754	1.097	7.392	58.037	0.78	1.93	3.218		11.9935
258	XR_003899357.1	NW_021838576.1:110654914-110655043	0.74	22.754	1.097	7.392	58.037	0.78	1.93	3.218		11.9935
259	XR_003899358.1	NW_021838576.1:110655310-110655439	0.74	22.754	1.097	7.392	58.037	0.78	1.93	3.218		11.9935
260	XR_003899505.1	NW_021838576.1:83595582-83595711	4.558	132.821	5.901	38.628	64.865	4.932	6.665	21.325		34.9619
261	XR_003899507.1	NW_021838576.1:83281953-83282082	3.01	5.627	2.879	23.815	39.682	0	1.458	1.972		9.80537
262	XR_003899511.1	NW_021838576.1:110649612-110649741	1.139	39.737	1.151	9.579	9.713	0.589	2.569	6.892		8.92112
263	XR_003899540.1	NW_021838576.1:110701003-110701132	0.108	4.603	0	2.329	13.107	0.294	0.625	0.414		2.685
264	XR_003899553.1	NW_021838576.1:110646917-110647046	5.263	2.209	2.447	11.338	17.369	0.176	0	0.483		4.91062
265	XR_003899562.1	NW_021838576.1:83607213-83607341	4.696	132.841	5.901	38.764	65.033	4.932	6.735	21.395		35.0371
266	XR_003899752.1	NW_021838602.1:266949-290270	336.396	289.23	724.909	828.821	883.19	1364.6	1087.41	1389.14		862.963
