# Supplementary material for: A mosquito small RNA genomics resource reveals dynamic evolution and host responses to viruses and transposons
Source: HighWire-hosted journal article supplement (doi:10.1101/gr.265157.120), 2021-01-08
Supplement: SupplementalTableS7.xlsx [file SupplementalTableS7.xlsx]

## Sheet: TableS7_AnGam
Table S7. Comparisons between Genic piRCLs top GO terms versus the gonads and embryos top GO terms in AnGam and AeAeg. Insufficient gene annotations and lack of existing mRNA datasets limits the extension of this analysis to CuQuin and AeAlbo.
Comparisons between Genic piRCLs top GO terms versus the testes top GO terms in AnGam
Gazili2019 testes GO BP process	Gazili GO term		MSRG GO BP process	MSRG GO term		Match based on BP process		Match based on GO term
microtubule cytoskeleton organization	GO:0000226		translation	GO:0006412		#N/A		#N/A
protein modification by small protein removal	GO:0070646		peptide biosynthetic process	GO:0043043		#N/A		#N/A
microtubule-based process	GO:0007017		amide biosynthetic process	GO:0043604		#N/A		#N/A
protein modification by small protein conjugation or removal	GO:0070647		peptide metabolic process	GO:0006518		#N/A		#N/A
DNA repair	GO:0006281		cellular amide metabolic process	GO:0043603		#N/A		#N/A
protein ubiquitination	GO:0016567		organonitrogen compound biosynthetic process	GO:1901566		#N/A		#N/A
cellular response to DNA damage stimulus	GO:0006974		cellular nitrogen compound biosynthetic process	GO:0044271		#N/A		#N/A
ubiquitin-dependent protein catabolic process	GO:0006511		cellular macromolecule biosynthetic process	GO:0034645		#N/A		#N/A
modification-dependent protein catabolic process	GO:0019941		macromolecule biosynthetic process	GO:0009059		#N/A		#N/A
modification-dependent macromolecule catabolic process	GO:0043632		gene expression	GO:0010467		#N/A		#N/A
DNA metabolic process	GO:0006259		cellular biosynthetic process	GO:0044249		#N/A		#N/A
cellular macromolecule catabolic process	GO:0044265		organic substance biosynthetic process	GO:1901576		#N/A		#N/A
protein modification by small protein conjugation	GO:0032446		biosynthetic process	GO:0009058		#N/A		#N/A
proteolysis involved in cellular protein catabolic process	GO:0051603		cellular nitrogen compound metabolic process	GO:0034641		#N/A		#N/A
cellular protein catabolic process	GO:0044257		ribosomal large subunit assembly	GO:0000027		#N/A		#N/A
cellular response to stress	GO:0033554		cellular protein metabolic process	GO:0044267		cellular protein metabolic process		GO:0044267
macromolecule catabolic process	GO:0009057		ribosomal large subunit biogenesis	GO:0042273		#N/A		#N/A
organelle organization	GO:0006996		cytoplasmic translation	GO:0002181		#N/A		#N/A
cellular protein modification process	GO:0006464		ribosome assembly	GO:0042255		#N/A		#N/A
protein modification process	GO:0036211		positive regulation of translational fidelity	GO:0045903		#N/A		#N/A
macromolecule modification	GO:0043412		ribosome biogenesis	GO:0042254		#N/A		#N/A
cellular component organization	GO:0016043		ribonucleoprotein complex biogenesis	GO:0022613		#N/A		#N/A
cellular macromolecule metabolic process	GO:0044260		ribonucleoprotein complex assembly	GO:0022618		#N/A		#N/A
cellular protein metabolic process	GO:0044267		cellular macromolecule metabolic process	GO:0044260		cellular macromolecule metabolic process		GO:0044260
cellular process	GO:0009987		ribonucleoprotein complex subunit organization	GO:0071826		#N/A		#N/A
oxidation-reduction process	GO:0055114		cellular metabolic process	GO:0044237		#N/A		#N/A
			protein metabolic process	GO:0019538		#N/A		#N/A
			regulation of translation	GO:0006417		#N/A		#N/A
			regulation of cellular amide metabolic process	GO:0034248		#N/A		#N/A
			ATP metabolic process	GO:0046034		#N/A		#N/A
			purine ribonucleoside triphosphate metabolic process	GO:0009205		#N/A		#N/A
			purine nucleoside triphosphate metabolic process	GO:0009144		#N/A		#N/A
			organelle assembly	GO:0070925		#N/A		#N/A
			organonitrogen compound metabolic process	GO:1901564		#N/A		#N/A
			ribonucleoside triphosphate metabolic process	GO:0009199		#N/A		#N/A
			nucleoside triphosphate metabolic process	GO:0009141		#N/A		#N/A
			posttranscriptional regulation of gene expression	GO:0010608		#N/A		#N/A
			regulation of translational fidelity	GO:0006450		#N/A		#N/A
			proton transmembrane transport	GO:1902600		#N/A		#N/A
			purine nucleoside monophosphate metabolic process	GO:0009126		#N/A		#N/A
			purine ribonucleoside monophosphate metabolic process	GO:0009167		#N/A		#N/A
			positive regulation of cellular amide metabolic process	GO:0034250		#N/A		#N/A
			positive regulation of translation	GO:0045727		#N/A		#N/A
			metabolic process	GO:0008152		#N/A		#N/A
			ribonucleoside monophosphate metabolic process	GO:0009161		#N/A		#N/A
			box C/D snoRNA processing	GO:0034963		#N/A		#N/A
			box C/D snoRNA metabolic process	GO:0033967		#N/A		#N/A
			histone glutamine methylation	GO:1990258		#N/A		#N/A
			box C/D snoRNA 3'-end processing	GO:0000494		#N/A		#N/A
			negative regulation of fibroblast growth factor receptor signaling pathway	GO:0040037		#N/A		#N/A
			nucleoside monophosphate metabolic process	GO:0009123		#N/A		#N/A
			organic substance metabolic process	GO:0071704		#N/A		#N/A
			primary metabolic process	GO:0044238		#N/A		#N/A
			translational elongation	GO:0006414		#N/A		#N/A
			ATP synthesis coupled proton transport	GO:0015986		#N/A		#N/A
			energy coupled proton transport, down electrochemical gradient	GO:0015985		#N/A		#N/A
			cellular component biogenesis	GO:0044085		#N/A		#N/A
			cellular respiration	GO:0045333		#N/A		#N/A
			macromolecule metabolic process	GO:0043170		#N/A		#N/A
			glyoxylate metabolic process	GO:0046487		#N/A		#N/A
			negative regulation of small GTPase mediated signal transduction	GO:0051058		#N/A		#N/A
			peptidyl-glutamine methylation	GO:0018364		#N/A		#N/A
			negative regulation of Ras protein signal transduction	GO:0046580		#N/A		#N/A
			polyprenol catabolic process	GO:0016095		#N/A		#N/A
			regulation of fibroblast growth factor receptor signaling pathway	GO:0040036		#N/A		#N/A
			cellular protein-containing complex assembly	GO:0034622		#N/A		#N/A
			nitrogen compound metabolic process	GO:0006807		#N/A		#N/A
			electron transport chain	GO:0022900		#N/A		#N/A
			energy derivation by oxidation of organic compounds	GO:0015980		#N/A		#N/A
			isoprenoid catabolic process	GO:0008300		#N/A		#N/A
			dolichol biosynthetic process	GO:0019408		#N/A		#N/A
			rescue of stalled ribosome	GO:0072344		#N/A		#N/A
			ribosomal protein import into nucleus	GO:0006610		#N/A		#N/A
			ADP transport	GO:0015866		#N/A		#N/A
			protein-containing complex assembly	GO:0065003		#N/A		#N/A
			ATP biosynthetic process	GO:0006754		#N/A		#N/A
			purine ribonucleotide metabolic process	GO:0009150		#N/A		#N/A
			purine nucleotide metabolic process	GO:0006163		#N/A		#N/A
			purine nucleoside triphosphate biosynthetic process	GO:0009145		#N/A		#N/A
			purine ribonucleoside triphosphate biosynthetic process	GO:0009206		#N/A		#N/A
			dolichol metabolic process	GO:0019348		#N/A		#N/A
			ATP transport	GO:0015867		#N/A		#N/A
			phosphatidylinositol-3-phosphate biosynthetic process	GO:0036092		#N/A		#N/A
			negative regulation of MAP kinase activity	GO:0043407		#N/A		#N/A
			antibacterial humoral response	GO:0019731		#N/A		#N/A
			autophagy of peroxisome	GO:0030242		#N/A		#N/A
			regulation of Ras protein signal transduction	GO:0046578		#N/A		#N/A
			ATP synthesis coupled electron transport	GO:0042773		#N/A		#N/A
			ribonucleotide metabolic process	GO:0009259		#N/A		#N/A
			oxidative phosphorylation	GO:0006119		#N/A		#N/A
			ribonucleoside triphosphate biosynthetic process	GO:0009201		#N/A		#N/A
			nucleoside triphosphate biosynthetic process	GO:0009142		#N/A		#N/A
			polyprenol biosynthetic process	GO:0016094		#N/A		#N/A
			monovalent inorganic cation transport	GO:0015672		#N/A		#N/A
			protein-containing complex subunit organization	GO:0043933		#N/A		#N/A
			respiratory electron transport chain	GO:0022904		#N/A		#N/A
			organophosphate metabolic process	GO:0019637		#N/A		#N/A
			polyprenol metabolic process	GO:0016093		#N/A		#N/A
			single strand break repair	GO:0000012		#N/A		#N/A
			negative regulation of cellular response to growth factor stimulus	GO:0090288		#N/A		#N/A
			negative regulation of MAPK cascade	GO:0043409		#N/A		#N/A
			purine-containing compound metabolic process	GO:0072521		#N/A		#N/A
			regulation of small GTPase mediated signal transduction	GO:0051056		#N/A		#N/A
			ribose phosphate metabolic process	GO:0019693		#N/A		#N/A
			positive regulation of cellular protein metabolic process	GO:0032270		#N/A		#N/A
			purine nucleoside monophosphate biosynthetic process	GO:0009127		#N/A		#N/A
			purine ribonucleoside monophosphate biosynthetic process	GO:0009168		#N/A		#N/A
			regulation of ARF protein signal transduction	GO:0032012		#N/A		#N/A
			defense response to Gram-negative bacterium	GO:0050829		#N/A		#N/A
			purine ribonucleotide transport	GO:0015868		#N/A		#N/A
			negative regulation of protein serine/threonine kinase activity	GO:0071901		#N/A		#N/A
			purine nucleotide transport	GO:0015865		#N/A		#N/A
			adenine nucleotide transport	GO:0051503		#N/A		#N/A
			regulation of cellular protein metabolic process	GO:0032268		#N/A		#N/A
			cellular component assembly	GO:0022607		#N/A		#N/A
			cellular process	GO:0009987		cellular process		GO:0009987
			positive regulation of protein metabolic process	GO:0051247		#N/A		#N/A

## Sheet: TableS7_AeAeg
Table S7. Comparisons between Genic piRCLs top GO terms versus the gonads and embryos top GO terms in AnGam and AeAeg. Insufficient gene annotations and lack of existing mRNA datasets limits the extension of this analysis to CuQuin and AeAlbo.
Comparisons between Genic piRCLs top GO terms versus the gonads and embryos top GO terms in AeAeg
Akbari2013 Ovary and early embryo GO BP process	Akbari2013 GO Term		MSRG GO BP process	MSRG GO term		Match based on BP process		Match based on GO term
asparagine metabolic process	GO:0006528		cellular nitrogen compound biosynthetic process	GO:0044271		#N/A		#N/A
asparagine biosynthetic process	GO:0006529		translation	GO:0006412		#N/A		#N/A
proteolysis	GO:0006508		peptide biosynthetic process	GO:0043043		#N/A		#N/A
ion transport	GO:0006811		amide biosynthetic process	GO:0043604		#N/A		#N/A
establishment of localization	GO:0051234		cellular amide metabolic process	GO:0043603		#N/A		#N/A
transport	GO:0006810		peptide metabolic process	GO:0006518		peptide metabolic process		GO:0006518
localization	GO:0051179		cellular macromolecule biosynthetic process	GO:0034645		#N/A		#N/A
aspartate family amino acid biosynthetic process	GO:0009067		macromolecule biosynthetic process	GO:0009059		#N/A		#N/A
peptide metabolic process	GO:0006518		gene expression	GO:0010467		#N/A		#N/A
aspartate family amino acid metabolic process	GO:0009066		cellular nitrogen compound metabolic process	GO:0034641		cellular nitrogen compound metabolic process		GO:0034641
tissue regeneration	GO:0042246		cellular biosynthetic process	GO:0044249		#N/A		#N/A
regeneration	GO:0031099		organic substance biosynthetic process	GO:1901576		#N/A		#N/A
cellular amine metabolic process	GO:0044106		biosynthetic process	GO:0009058		#N/A		#N/A
transmembrane transport	GO:0055085		organonitrogen compound biosynthetic process	GO:1901566		#N/A		#N/A
protein thiol-disulfide exchange	GO:0006467		cellular macromolecule metabolic process	GO:0044260		cellular macromolecule metabolic process		GO:0044260
wound healing	GO:0042060		nitrogen compound metabolic process	GO:0006807		nitrogen compound metabolic process		GO:0006807
developmental growth	GO:0048589		organonitrogen compound metabolic process	GO:1901564		#N/A		#N/A
oxoacid metabolic process	GO:0043436		cellular protein metabolic process	GO:0044267		#N/A		#N/A
organic acid metabolic process	GO:0006082		cellular metabolic process	GO:0044237		cellular metabolic process		GO:0044237
carboxylic acid metabolic process	GO:0019752		macromolecule metabolic process	GO:0043170		#N/A		#N/A
cellular ketone metabolic process	GO:0042180		organic substance metabolic process	GO:0071704		#N/A		#N/A
response to wounding	GO:0009611		protein metabolic process	GO:0019538		#N/A		#N/A
monovalent inorganic cation transport	GO:0015672		primary metabolic process	GO:0044238		#N/A		#N/A
cellular amino acid metabolic process	GO:0006520		organonitrogen compound catabolic process	GO:1901565		#N/A		#N/A
alkene biosynthetic process	GO:0043450		protein catabolic process	GO:0030163		protein catabolic process		GO:0030163
leukotriene biosynthetic process	GO:0019370		pyrimidine deoxyribonucleotide biosynthetic process	GO:0009221		#N/A		#N/A
icosanoid biosynthetic process	GO:0046456		deoxyribose phosphate metabolic process	GO:0019692		#N/A		#N/A
cellular alkene metabolic process	GO:0043449		2'-deoxyribonucleotide metabolic process	GO:0009394		#N/A		#N/A
icosanoid metabolic process	GO:0006690		2'-deoxyribonucleotide biosynthetic process	GO:0009265		#N/A		#N/A
leukotriene metabolic process	GO:0006691		deoxyribose phosphate biosynthetic process	GO:0046385		#N/A		#N/A
unsaturated fatty acid metabolic process	GO:0033559		pyrimidine deoxyribonucleotide metabolic process	GO:0009219		#N/A		#N/A
unsaturated fatty acid biosynthetic process	GO:0006636		metabolic process	GO:0008152		#N/A		#N/A
metal ion transport	GO:0030001		oocyte development	GO:0048599		#N/A		#N/A
amine biosynthetic process	GO:0009309		oocyte differentiation	GO:0009994		#N/A		#N/A
cation transport	GO:0006812		cellular process	GO:0009987		cellular process		GO:0009987
anatomical structure morphogenesis	GO:0009653		deoxyribonucleotide biosynthetic process	GO:0009263		#N/A		#N/A
spermidine biosynthetic process	GO:0008295		proteolysis involved in cellular protein catabolic process	GO:0051603		proteolysis involved in cellular protein catabolic process		GO:0051603
spermine metabolic process	GO:0008215		cellular protein catabolic process	GO:0044257		cellular protein catabolic process		GO:0044257
spermidine metabolic process	GO:0008216		deoxyribonucleotide metabolic process	GO:0009262		deoxyribonucleotide metabolic process		GO:0009262
spermine biosynthetic process	GO:0006597		DNA-templated transcription, initiation	GO:0006352		#N/A		#N/A
growth	GO:0040007		macromolecule catabolic process	GO:0009057		macromolecule catabolic process		GO:0009057
lipid catabolic process	GO:0016042		ribonucleoprotein complex biogenesis	GO:0022613		#N/A		#N/A
Adult ovary and early embryo	0		aromatic compound biosynthetic process	GO:0019438		#N/A		#N/A
macromolecule modification	GO:0043412		ribosome assembly	GO:0042255		#N/A		#N/A
protein modification process	GO:0006464		heterocycle biosynthetic process	GO:0018130		#N/A		#N/A
phosphorus metabolic process	GO:0006793		ribosome biogenesis	GO:0042254		#N/A		#N/A
phosphate-containing compound metabolic process	GO:0006796		organic substance catabolic process	GO:1901575		#N/A		#N/A
protein phosphorylation	GO:0006468		organic cyclic compound biosynthetic process	GO:1901362		#N/A		#N/A
phosphorylation	GO:0016310		transposition, DNA-mediated	GO:0006313		#N/A		#N/A
cellular process	GO:0009987		female gamete generation	GO:0007292		#N/A		#N/A
nucleobase-containing compound metabolic process	GO:0006139		oogenesis	GO:0048477		#N/A		#N/A
regulation of biological process	GO:0050789		transposition	GO:0032196		#N/A		#N/A
cellular response to stimulus	GO:0051716		nucleobase-containing compound biosynthetic process	GO:0034654		nucleobase-containing compound biosynthetic process		GO:0034654
biological regulation	GO:0065007		catabolic process	GO:0009056		catabolic process		GO:0009056
cellular nitrogen compound metabolic process	GO:0034641		cellular macromolecule catabolic process	GO:0044265		cellular macromolecule catabolic process		GO:0044265
regulation of cellular process	GO:0050794		ribonucleoprotein complex assembly	GO:0022618		#N/A		#N/A
nucleic acid metabolic process	GO:0090304		ribonucleoprotein complex subunit organization	GO:0071826		#N/A		#N/A
regulation of primary metabolic process	GO:0080090		cellular catabolic process	GO:0044248		cellular catabolic process		GO:0044248
DNA metabolic process	GO:0006259		pyrimidine nucleotide biosynthetic process	GO:0006221		pyrimidine nucleotide biosynthetic process		GO:0006221
response to stimulus	GO:0050896		dTDP biosynthetic process	GO:0006233		#N/A		#N/A
regulation of metabolic process	GO:0019222		ocellus pigmentation	GO:0033060		#N/A		#N/A
cell communication	GO:0007154		pentose-phosphate shunt, non-oxidative branch	GO:0009052		#N/A		#N/A
regulation of cellular metabolic process	GO:0031323		deoxyribonucleoside diphosphate biosynthetic process	GO:0009189		#N/A		#N/A
regulation of catalytic activity	GO:0050790		pyrimidine deoxyribonucleotide catabolic process	GO:0009223		#N/A		#N/A
regulation of molecular function	GO:0065009		pyrimidine deoxyribonucleoside triphosphate catabolic process	GO:0009213		#N/A		#N/A
regulation of protein kinase activity	GO:0045859		pyrimidine deoxyribonucleoside triphosphate metabolic process	GO:0009211		#N/A		#N/A
regulation of transferase activity	GO:0051338		dUMP biosynthetic process	GO:0006226		#N/A		#N/A
regulation of kinase activity	GO:0043549		pyrimidine deoxyribonucleoside diphosphate metabolic process	GO:0009196		#N/A		#N/A
signaling	GO:0023052		deoxyribonucleoside diphosphate metabolic process	GO:0009186		deoxyribonucleoside diphosphate metabolic process		GO:0009186
nitrogen compound metabolic process	GO:0006807		pyrimidine nucleotide catabolic process	GO:0006244		#N/A		#N/A
regulation of macromolecule metabolic process	GO:0060255		pyrimidine nucleoside triphosphate catabolic process	GO:0009149		#N/A		#N/A
activation of protein kinase activity	GO:0032147		ommochrome biosynthetic process	GO:0006727		#N/A		#N/A
activation of protein kinase C activity by G-protein coupled receptor protein signaling pathway	GO:0007205		pyrimidine deoxyribonucleoside diphosphate biosynthetic process	GO:0009197		#N/A		#N/A
cellular metabolic process	GO:0044237		ocellus pigment biosynthetic process	GO:0008055		#N/A		#N/A
regulation of protein phosphorylation	GO:0001932		pyrimidine nucleoside diphosphate biosynthetic process	GO:0009139		#N/A		#N/A
regulation of protein modification process	GO:0031399		ocellus pigment metabolic process	GO:0046158		#N/A		#N/A
signal transduction	GO:0007165		pyrimidine nucleoside diphosphate metabolic process	GO:0009138		#N/A		#N/A
deoxyribonucleoside diphosphate metabolic process	GO:0009186		dUTP catabolic process	GO:0046081		#N/A		#N/A
nucleoside diphosphate metabolic process	GO:0009132		dUMP metabolic process	GO:0046078		#N/A		#N/A
regulation of phosphorylation	GO:0042325		ribosomal small subunit assembly	GO:0000028		#N/A		#N/A
positive regulation of protein kinase activity	GO:0045860		dUTP metabolic process	GO:0046080		#N/A		#N/A
positive regulation of transferase activity	GO:0051347		dTDP metabolic process	GO:0046072		#N/A		#N/A
positive regulation of kinase activity	GO:0033674		deoxyribose phosphate catabolic process	GO:0046386		#N/A		#N/A
regulation of Ras protein signal transduction	GO:0046578		maltose metabolic process	GO:0000023		#N/A		#N/A
regulation of small GTPase mediated signal transduction	GO:0051056		ommochrome metabolic process	GO:0046152		#N/A		#N/A
regulation of phosphate metabolic process	GO:0019220		pyrimidine nucleotide metabolic process	GO:0006220		#N/A		#N/A
regulation of phosphorus metabolic process	GO:0051174		nucleic acid-templated transcription	GO:0097659		#N/A		#N/A
regulation of protein metabolic process	GO:0051246		transcription, DNA-templated	GO:0006351		transcription, DNA-templated		GO:0006351
purine-containing compound metabolic process	GO:0072521		pyrimidine-containing compound biosynthetic process	GO:0072528		pyrimidine-containing compound biosynthetic process		GO:0072528
cellular component assembly at cellular level	GO:0071844		RNA biosynthetic process	GO:0032774		RNA biosynthetic process		GO:0032774
regulation of cellular protein metabolic process	GO:0032268		cellular process involved in reproduction in multicellular organism	GO:0022412		#N/A		#N/A
DNA repair	GO:0006281		germ cell development	GO:0007281		#N/A		#N/A
regulation of nucleobase-containing compound metabolic process	GO:0019219		developmental process involved in reproduction	GO:0003006		#N/A		#N/A
regulation of nitrogen compound metabolic process	GO:0051171		nucleoside triphosphate catabolic process	GO:0009143		nucleoside triphosphate catabolic process		GO:0009143
regulation of Rab GTPase activity	GO:0032313		pyrimidine deoxyribonucleoside monophosphate metabolic process	GO:0009176		#N/A		#N/A
regulation of Rab protein signal transduction	GO:0032483		eye pigment biosynthetic process	GO:0006726		#N/A		#N/A
cellular component assembly	GO:0022607		pigment metabolic process involved in developmental pigmentation	GO:0043324		#N/A		#N/A
response to DNA damage stimulus	GO:0006974		deoxyribonucleotide catabolic process	GO:0009264		#N/A		#N/A
organelle organization	GO:0006996		deoxyribonucleoside triphosphate catabolic process	GO:0009204		#N/A		#N/A
positive regulation of molecular function	GO:0044093		deoxyribonucleoside monophosphate biosynthetic process	GO:0009157		#N/A		#N/A
positive regulation of catalytic activity	GO:0043085		deoxyribonucleoside monophosphate metabolic process	GO:0009162		#N/A		#N/A
regulation of signal transduction	GO:0009966		deoxyribonucleoside triphosphate metabolic process	GO:0009200		#N/A		#N/A
regulation of signaling	GO:0023051		pyrimidine deoxyribonucleoside monophosphate biosynthetic process	GO:0009177		#N/A		#N/A
organophosphate metabolic process	GO:0019637		pigment metabolic process involved in pigmentation	GO:0043474		#N/A		#N/A
chromatin assembly	GO:0031497		eye pigment metabolic process	GO:0042441		#N/A		#N/A
protein-DNA complex subunit organization	GO:0071824		tryptophan catabolic process to kynurenine	GO:0019441		#N/A		#N/A
protein-DNA complex assembly	GO:0065004		eye pigmentation	GO:0048069		#N/A		#N/A
nucleosome assembly	GO:0006334		peptidyl-arginine methylation, to symmetrical-dimethyl arginine	GO:0019918		#N/A		#N/A
phospholipid metabolic process	GO:0006644		gamete generation	GO:0007276		#N/A		#N/A
regulation of response to stimulus	GO:0048583		negative regulation of endopeptidase activity	GO:0010951		#N/A		#N/A
cellular response to stress	GO:0033554		pyrimidine-containing compound metabolic process	GO:0072527		#N/A		#N/A
nucleosome organization	GO:0034728		regulation of endopeptidase activity	GO:0052548		#N/A		#N/A
DNA packaging	GO:0006323		biological process	GO:0008150		#N/A		#N/A
cellular component organization at cellular level	GO:0071842		multicellular organismal reproductive process	GO:0048609		#N/A		#N/A
phosphatidylinositol metabolic process	GO:0046488		multicellular organism reproduction	GO:0032504		#N/A		#N/A
cellular macromolecular complex assembly	GO:0034622		translational elongation	GO:0006414		#N/A		#N/A
chromatin organization	GO:0006325		negative regulation of peptidase activity	GO:0010466		#N/A		#N/A
nucleobase-containing small molecule metabolic process	GO:0055086		negative regulation of proteolysis	GO:0045861		#N/A		#N/A
cellular component organization	GO:0016043		nucleoside diphosphate biosynthetic process	GO:0009133		#N/A		#N/A
macromolecular complex assembly	GO:0065003		indolalkylamine metabolic process	GO:0006586		#N/A		#N/A
glycerolipid metabolic process	GO:0046486		RNA-dependent DNA biosynthetic process	GO:0006278		#N/A		#N/A
glycerophospholipid metabolic process	GO:0006650		developmental pigmentation	GO:0048066		#N/A		#N/A
cellular macromolecule metabolic process	GO:0044260		pigmentation	GO:0043473		#N/A		#N/A
GTP metabolic process	GO:0046039		cellular biogenic amine catabolic process	GO:0042402		#N/A		#N/A
macromolecule localization	GO:0033036		peptidyl-arginine omega-N-methylation	GO:0035247		#N/A		#N/A
chromatin assembly or disassembly	GO:0006333		kynurenine metabolic process	GO:0070189		#N/A		#N/A
chromosome organization	GO:0051276		indole-containing compound catabolic process	GO:0042436		#N/A		#N/A
nucleotide metabolic process	GO:0009117		indolalkylamine catabolic process	GO:0046218		#N/A		#N/A
nucleoside phosphate metabolic process	GO:0006753		amine catabolic process	GO:0009310		#N/A		#N/A
deoxyribonucleotide metabolic process	GO:0009262		tryptophan catabolic process	GO:0006569		#N/A		#N/A
DNA conformation change	GO:0071103		tryptophan metabolic process	GO:0006568		#N/A		#N/A
ribonucleoside metabolic process	GO:0009119		regulation of peptidase activity	GO:0052547		#N/A		#N/A
intracellular signal transduction	GO:0035556		cell development	GO:0048468		#N/A		#N/A
modification-dependent protein catabolic process	GO:0019941		sexual reproduction	GO:0019953		#N/A		#N/A
ubiquitin-dependent protein catabolic process	GO:0006511		multi-organism reproductive process	GO:0044703		#N/A		#N/A
modification-dependent macromolecule catabolic process	GO:0043632		benzene-containing compound metabolic process	GO:0042537		#N/A		#N/A
establishment of protein localization	GO:0045184		secondary metabolite biosynthetic process	GO:0044550		#N/A		#N/A
protein transport	GO:0015031		disaccharide metabolic process	GO:0005984		#N/A		#N/A
Ras protein signal transduction	GO:0007265		pyrimidine-containing compound catabolic process	GO:0072529		#N/A		#N/A
cellular macromolecular complex subunit organization	GO:0034621		indole-containing compound metabolic process	GO:0042430		#N/A		#N/A
nucleoside triphosphate metabolic process	GO:0009141		secondary metabolic process	GO:0019748		#N/A		#N/A
actin cytoskeleton organization	GO:0030036		negative regulation of hydrolase activity	GO:0051346		#N/A		#N/A
transcription, DNA-dependent	GO:0006351		regulation of proteolysis	GO:0030162		#N/A		#N/A
dephosphorylation	GO:0016311		cellular protein-containing complex assembly	GO:0034622		cellular protein-containing complex assembly		GO:0034622
purine nucleotide metabolic process	GO:0006163		cellular component biogenesis	GO:0044085		cellular component biogenesis		GO:0044085
cellular component organization or biogenesis at cellular level	GO:0071841		regulation of translational initiation	GO:0006446		#N/A		#N/A
RNA biosynthetic process	GO:0032774		ribosomal large subunit assembly	GO:0000027		#N/A		#N/A
purine ribonucleoside metabolic process	GO:0046128		peptidyl-arginine modification	GO:0018195		#N/A		#N/A
purine nucleoside metabolic process	GO:0042278		ceramide metabolic process	GO:0006672		#N/A		#N/A
macromolecular complex subunit organization	GO:0043933		nucleoside monophosphate phosphorylation	GO:0046940		#N/A		#N/A
actin filament-based process	GO:0030029		peptidyl-arginine N-methylation	GO:0035246		#N/A		#N/A
cellular component biogenesis	GO:0044085		peptidyl-arginine methylation	GO:0018216		#N/A		#N/A
protein localization	GO:0008104
regulation of Ras GTPase activity	GO:0032318
regulation of RNA metabolic process	GO:0051252
regulation of RNA biosynthetic process	GO:2001141
regulation of transcription, DNA-dependent	GO:0006355
phospholipid biosynthetic process	GO:0008654
regulation of cellular biosynthetic process	GO:0031326
regulation of cellular macromolecule biosynthetic process	GO:2000112
regulation of biosynthetic process	GO:0009889
regulation of macromolecule biosynthetic process	GO:0010556
post-translational protein modification	GO:0043687
ribonucleoside triphosphate metabolic process	GO:0009199
purine nucleoside triphosphate metabolic process	GO:0009144
purine ribonucleoside triphosphate metabolic process	GO:0009205
cellular protein catabolic process	GO:0044257
proteolysis involved in cellular protein catabolic process	GO:0051603
regulation of gene expression	GO:0010468
cellular component organization or biogenesis	GO:0071840
small GTPase mediated signal transduction	GO:0007264
cellular macromolecule localization	GO:0070727
cellular protein localization	GO:0034613
purine ribonucleotide metabolic process	GO:0009150
regulation of cellular catabolic process	GO:0031329
purine nucleotide catabolic process	GO:0006195
GTP catabolic process	GO:0006184
purine ribonucleotide catabolic process	GO:0009154
nucleoside triphosphate catabolic process	GO:0009143
purine nucleoside triphosphate catabolic process	GO:0009146
ribonucleotide catabolic process	GO:0009261
regulation of purine nucleotide catabolic process	GO:0033121
regulation of GTP catabolic process	GO:0033124
ribonucleoside triphosphate catabolic process	GO:0009203
purine ribonucleoside triphosphate catabolic process	GO:0009207
purine-containing compound catabolic process	GO:0072523
regulation of GTPase activity	GO:0043087
regulation of nucleotide catabolic process	GO:0030811
glyoxylate metabolic process	GO:0046487
glyoxylate cycle	GO:0006097
intracellular protein transport	GO:0006886
regulation of nucleotide metabolic process	GO:0006140
ribonucleotide metabolic process	GO:0009259
regulation of hydrolase activity	GO:0051336
cellular macromolecule catabolic process	GO:0044265
regulation of catabolic process	GO:0009894
nucleoside metabolic process	GO:0009116
Rho protein signal transduction	GO:0007266
regulation of Rho protein signal transduction	GO:0035023
pyrimidine nucleoside triphosphate biosynthetic process	GO:0009148
cellular catabolic process	GO:0044248
RNA metabolic process	GO:0016070
intracellular transport	GO:0046907
protein catabolic process	GO:0030163
coenzyme A biosynthetic process	GO:0015937
filopodium assembly	GO:0046847
cell projection assembly	GO:0030031
heterocycle metabolic process	GO:0046483
GPI anchor biosynthetic process	GO:0006506
phosphatidylinositol biosynthetic process	GO:0006661
purine-containing compound biosynthetic process	GO:0072522
response to stress	GO:0006950
pyrimidine nucleoside triphosphate metabolic process	GO:0009147
cellular localization	GO:0051641
glycerophospholipid biosynthetic process	GO:0046474
lipoprotein metabolic process	GO:0042157
lipoprotein biosynthetic process	GO:0042158
glycerolipid biosynthetic process	GO:0045017
protein lipidation	GO:0006497
nucleotide catabolic process	GO:0009166
nucleobase-containing compound catabolic process	GO:0034655
nucleobase-containing compound biosynthetic process	GO:0034654
amino acid transport	GO:0006865
amine transport	GO:0015837
macromolecule catabolic process	GO:0009057
protein prenylation	GO:0018342
coenzyme A metabolic process	GO:0015936
nucleoside bisphosphate metabolic process	GO:0033865
establishment of localization in cell	GO:0051649
small molecule metabolic process	GO:0044281
nitrogen compound transport	GO:0071705
pseudouridine synthesis	GO:0001522
cellular nitrogen compound catabolic process	GO:0044270
GPI anchor metabolic process	GO:0006505
catabolic process	GO:0009056
glycosaminoglycan metabolic process	GO:0030203
purine nucleoside biosynthetic process	GO:0042451
ribonucleoside biosynthetic process	GO:0042455
nucleoside biosynthetic process	GO:0009163
purine ribonucleoside biosynthetic process	GO:0046129
phospholipid transport	GO:0015914
cellular aldehyde metabolic process	GO:0006081
transcription elongation, DNA-dependent	GO:0006354
heterocycle catabolic process	GO:0046700
cytoskeleton organization	GO:0007010
protein dephosphorylation	GO:0006470
GTP biosynthetic process	GO:0006183
UTP biosynthetic process	GO:0006228
CTP biosynthetic process	GO:0006241
pyrimidine ribonucleoside triphosphate metabolic process	GO:0009208
pyrimidine ribonucleoside triphosphate biosynthetic process	GO:0009209
peptidyl-lysine modification	GO:0018205
peroxisome organization	GO:0007031
UTP metabolic process	GO:0046051
sex differentiation	GO:0007548
CTP metabolic process	GO:0046036
cell projection organization	GO:0030030
purine nucleotide biosynthetic process	GO:0006164
pyrimidine nucleotide biosynthetic process	GO:0006221
pyrimidine-containing compound biosynthetic process	GO:0072528
Male germline and nonblood-fed ovary	0
chitin metabolic process	GO:0006030
aminoglycan metabolic process	GO:0006022
polysaccharide metabolic process	GO:0005976
amine metabolic process	GO:0009308
carbohydrate metabolic process	GO:0005975
chitin catabolic process	GO:0006032
polysaccharide catabolic process	GO:0000272
aminoglycan catabolic process	GO:0006026
response to oxidative stress	GO:0006979
response to chemical stimulus	GO:0042221
carbohydrate catabolic process	GO:0016052
innate immune response	GO:0045087

## Sheet: AnGam_MSRG_GO
Genic piRCLs GO terms in AnGam
ID	Name	Bgd count	Result count	Result gene list	Pct of bgd	Fold enrichment	Odds ratio	P-value	Benjamini	Bonferroni	Neg-logpval
GO:0006412	translation	268	21	AGAP000654,AGAP000952,AGAP002395,AGAP002437,AGAP002921,AGAP003025,AGAP003556,AGAP003592,AGAP003768,AGAP004919,AGAP005061,AGAP005427,AGAP005991,AGAP006037,AGAP009031,AGAP009998,AGAP010173,AGAP010591,AGAP011706,AGAP012100,AGAP012140,	7.8	11.92	18.04	1.4529e-17	4.27679e-15	6.79957e-15	16.8378
GO:0043043	peptide biosynthetic process	271	21	AGAP000654,AGAP000952,AGAP002395,AGAP002437,AGAP002921,AGAP003025,AGAP003556,AGAP003592,AGAP003768,AGAP004919,AGAP005061,AGAP005427,AGAP005991,AGAP006037,AGAP009031,AGAP009998,AGAP010173,AGAP010591,AGAP011706,AGAP012100,AGAP012140,	7.7	11.79	17.82	1.82769e-17	4.27679e-15	8.55358e-15	16.7381
GO:0043604	amide biosynthetic process	302	21	AGAP000654,AGAP000952,AGAP002395,AGAP002437,AGAP002921,AGAP003025,AGAP003556,AGAP003592,AGAP003768,AGAP004919,AGAP005061,AGAP005427,AGAP005991,AGAP006037,AGAP009031,AGAP009998,AGAP010173,AGAP010591,AGAP011706,AGAP012100,AGAP012140,	7	10.58	15.8	1.68143e-16	2.62303e-14	7.8691e-14	15.7743
GO:0006518	peptide metabolic process	353	21	AGAP000654,AGAP000952,AGAP002395,AGAP002437,AGAP002921,AGAP003025,AGAP003556,AGAP003592,AGAP003768,AGAP004919,AGAP005061,AGAP005427,AGAP005991,AGAP006037,AGAP009031,AGAP009998,AGAP010173,AGAP010591,AGAP011706,AGAP012100,AGAP012140,	5.9	9.05	13.31	3.93374e-15	4.60247e-13	1.84099e-12	14.4052
GO:0043603	cellular amide metabolic process	435	21	AGAP000654,AGAP000952,AGAP002395,AGAP002437,AGAP002921,AGAP003025,AGAP003556,AGAP003592,AGAP003768,AGAP004919,AGAP005061,AGAP005427,AGAP005991,AGAP006037,AGAP009031,AGAP009998,AGAP010173,AGAP010591,AGAP011706,AGAP012100,AGAP012140,	4.8	7.35	10.58	2.45102e-13	2.29415e-11	1.14708e-10	12.6107
GO:1901566	organonitrogen compound biosynthetic process	674	24	AGAP000523,AGAP000654,AGAP000952,AGAP002395,AGAP002437,AGAP002921,AGAP003025,AGAP003556,AGAP003592,AGAP003768,AGAP004616,AGAP004919,AGAP005061,AGAP005427,AGAP005991,AGAP006037,AGAP007493,AGAP009031,AGAP009998,AGAP010173,AGAP010591,AGAP011706,AGAP012100,AGAP012140,	3.6	5.42	8.02	2.36983e-12	1.84847e-10	1.10908e-09	11.6253
GO:0044271	cellular nitrogen compound biosynthetic process	629	23	AGAP000523,AGAP000654,AGAP000952,AGAP002395,AGAP002437,AGAP002921,AGAP003025,AGAP003556,AGAP003592,AGAP003768,AGAP004616,AGAP004919,AGAP005061,AGAP005427,AGAP005991,AGAP006037,AGAP009031,AGAP009998,AGAP010173,AGAP010591,AGAP011706,AGAP012100,AGAP012140,	3.7	5.56	8.11	4.54561e-12	3.03906e-10	2.12734e-09	11.3424
GO:0034645	cellular macromolecule biosynthetic process	624	22	AGAP000654,AGAP000952,AGAP002395,AGAP002437,AGAP002921,AGAP003025,AGAP003556,AGAP003592,AGAP003768,AGAP004919,AGAP005061,AGAP005427,AGAP005991,AGAP006037,AGAP007493,AGAP009031,AGAP009998,AGAP010173,AGAP010591,AGAP011706,AGAP012100,AGAP012140,	3.5	5.36	7.64	3.10798e-11	1.81817e-09	1.45454e-08	10.5075
GO:0009059	macromolecule biosynthetic process	629	22	AGAP000654,AGAP000952,AGAP002395,AGAP002437,AGAP002921,AGAP003025,AGAP003556,AGAP003592,AGAP003768,AGAP004919,AGAP005061,AGAP005427,AGAP005991,AGAP006037,AGAP007493,AGAP009031,AGAP009998,AGAP010173,AGAP010591,AGAP011706,AGAP012100,AGAP012140,	3.5	5.32	7.57	3.63258e-11	1.88894e-09	1.70005e-08	10.4398
GO:0010467	gene expression	851	25	AGAP000654,AGAP000952,AGAP002395,AGAP002437,AGAP002921,AGAP003025,AGAP003556,AGAP003592,AGAP003768,AGAP004746,AGAP004919,AGAP005061,AGAP005427,AGAP005549,AGAP005991,AGAP006037,AGAP009031,AGAP009075,AGAP009998,AGAP010173,AGAP010591,AGAP011244,AGAP011706,AGAP012100,AGAP012140,	2.9	4.47	6.61	4.89693e-11	2.29176e-09	2.29176e-08	10.3101
GO:0044249	cellular biosynthetic process	1028	25	AGAP000523,AGAP000654,AGAP000952,AGAP002395,AGAP002437,AGAP002921,AGAP003025,AGAP003556,AGAP003592,AGAP003768,AGAP004616,AGAP004919,AGAP005061,AGAP005427,AGAP005991,AGAP006037,AGAP007493,AGAP009031,AGAP009998,AGAP010173,AGAP010273,AGAP010591,AGAP011706,AGAP012100,AGAP012140,	2.4	3.7	5.34	2.69871e-09	1.14818e-07	1.263e-06	8.56884
GO:1901576	organic substance biosynthetic process	1073	25	AGAP000523,AGAP000654,AGAP000952,AGAP002395,AGAP002437,AGAP002921,AGAP003025,AGAP003556,AGAP003592,AGAP003768,AGAP004616,AGAP004919,AGAP005061,AGAP005427,AGAP005991,AGAP006037,AGAP007493,AGAP009031,AGAP009998,AGAP010173,AGAP010273,AGAP010591,AGAP011706,AGAP012100,AGAP012140,	2.3	3.55	5.09	6.53339e-09	2.54802e-07	3.05762e-06	8.18486
GO:0009058	biosynthetic process	1103	25	AGAP000523,AGAP000654,AGAP000952,AGAP002395,AGAP002437,AGAP002921,AGAP003025,AGAP003556,AGAP003592,AGAP003768,AGAP004616,AGAP004919,AGAP005061,AGAP005427,AGAP005991,AGAP006037,AGAP007493,AGAP009031,AGAP009998,AGAP010173,AGAP010273,AGAP010591,AGAP011706,AGAP012100,AGAP012140,	2.3	3.45	4.93	1.14807e-08	4.13307e-07	5.37299e-06	7.94003
GO:0034641	cellular nitrogen compound metabolic process	1531	29	AGAP000523,AGAP000654,AGAP000952,AGAP002395,AGAP002437,AGAP002921,AGAP003025,AGAP003556,AGAP003592,AGAP003768,AGAP004307,AGAP004616,AGAP004919,AGAP005061,AGAP005427,AGAP005549,AGAP005991,AGAP006037,AGAP009031,AGAP009075,AGAP009998,AGAP010173,AGAP010591,AGAP011244,AGAP011706,AGAP012100,AGAP012140,AGAP028366,AGAP028371,	1.9	2.88	4.31	2.75357e-08	9.20478e-07	1.28867e-05	7.5601
GO:0000027	ribosomal large subunit assembly	23	5	AGAP002395,AGAP003556,AGAP003592,AGAP006037,AGAP009031,	21.7	33.08	45.19	3.24883e-07	1.01364e-05	0.000152045	6.48827
GO:0044267	cellular protein metabolic process	1344	24	AGAP000654,AGAP000952,AGAP002395,AGAP002437,AGAP002921,AGAP003025,AGAP003556,AGAP003592,AGAP003768,AGAP004919,AGAP005061,AGAP005427,AGAP005991,AGAP006037,AGAP007493,AGAP009031,AGAP009998,AGAP010173,AGAP010591,AGAP011244,AGAP011706,AGAP011872,AGAP012100,AGAP012140,	1.8	2.72	3.68	2.23096e-06	6.52557e-05	0.00104409	5.65151
GO:0042273	ribosomal large subunit biogenesis	63	6	AGAP002395,AGAP003556,AGAP003592,AGAP005991,AGAP006037,AGAP009031,	9.5	14.49	17.33	3.26841e-06	8.99774e-05	0.00152962	5.48566
GO:0002181	cytoplasmic translation	46	5	AGAP002921,AGAP003592,AGAP004919,AGAP012100,AGAP012140,	10.9	16.54	19.8	1.17739e-05	0.000306121	0.00551017	4.92908
GO:0042255	ribosome assembly	47	5	AGAP002395,AGAP003556,AGAP003592,AGAP006037,AGAP009031,	10.6	16.19	19.32	1.31088e-05	0.000322889	0.0061349	4.88244
GO:0045903	positive regulation of translational fidelity	2	2	AGAP005061,AGAP012708,	100	152.16	inf	4.257e-05	0.000996138	0.0199228	4.3709
GO:0042254	ribosome biogenesis	200	8	AGAP002395,AGAP002437,AGAP003556,AGAP003592,AGAP005991,AGAP006037,AGAP009031,AGAP011244,	4	6.09	6.99	4.65768e-05	0.001038	0.0217979	4.33183
GO:0022613	ribonucleoprotein complex biogenesis	262	9	AGAP002395,AGAP002437,AGAP003556,AGAP003592,AGAP005991,AGAP006037,AGAP009031,AGAP011244,AGAP012140,	3.4	5.23	6.03	5.00841e-05	0.00106543	0.0234394	4.3003
GO:0022618	ribonucleoprotein complex assembly	114	6	AGAP002395,AGAP003556,AGAP003592,AGAP006037,AGAP009031,AGAP012140,	5.3	8.01	9.1	9.86718e-05	0.00200776	0.0461784	4.00581
GO:0044260	cellular macromolecule metabolic process	1799	25	AGAP000654,AGAP000952,AGAP002395,AGAP002437,AGAP002921,AGAP003025,AGAP003556,AGAP003592,AGAP003768,AGAP004307,AGAP004919,AGAP005061,AGAP005427,AGAP005991,AGAP006037,AGAP007493,AGAP009031,AGAP009998,AGAP010173,AGAP010591,AGAP011244,AGAP011706,AGAP011872,AGAP012100,AGAP012140,	1.4	2.11	2.77	0.000106947	0.00208546	0.0500511	3.97083
GO:0071826	ribonucleoprotein complex subunit organization	118	6	AGAP002395,AGAP003556,AGAP003592,AGAP006037,AGAP009031,AGAP012140,	5.1	7.74	8.77	0.000119433	0.00223579	0.0558947	3.92287
GO:0044237	cellular metabolic process	3186	35	AGAP000523,AGAP000654,AGAP000952,AGAP002395,AGAP002437,AGAP002921,AGAP003025,AGAP003099,AGAP003556,AGAP003592,AGAP003768,AGAP004307,AGAP004616,AGAP004919,AGAP005061,AGAP005427,AGAP005549,AGAP005991,AGAP006037,AGAP007493,AGAP009031,AGAP009075,AGAP009998,AGAP010173,AGAP010273,AGAP010552,AGAP010591,AGAP011244,AGAP011706,AGAP011872,AGAP012100,AGAP012140,AGAP012445,AGAP028366,AGAP028371,	1.1	1.67	2.38	0.000304272	0.0054769	0.142399	3.51674
GO:0019538	protein metabolic process	1945	24	AGAP000654,AGAP000952,AGAP002395,AGAP002437,AGAP002921,AGAP003025,AGAP003556,AGAP003592,AGAP003768,AGAP004919,AGAP005061,AGAP005427,AGAP005991,AGAP006037,AGAP007493,AGAP009031,AGAP009998,AGAP010173,AGAP010591,AGAP011244,AGAP011706,AGAP011872,AGAP012100,AGAP012140,	1.2	1.88	2.36	0.000968977	0.0167956	0.453481	3.01369
GO:0006417	regulation of translation	68	4	AGAP005061,AGAP010173,AGAP012140,AGAP012708,	5.9	8.95	9.97	0.00101389	0.0169464	0.4745	2.99401
GO:0034248	regulation of cellular amide metabolic process	69	4	AGAP005061,AGAP010173,AGAP012140,AGAP012708,	5.8	8.82	9.81	0.001071	0.0172837	0.501226	2.97021
GO:0046034	ATP metabolic process	77	4	AGAP000523,AGAP004616,AGAP028366,AGAP028371,	5.2	7.9	8.73	0.00161181	0.0251443	0.754329	2.79269
GO:0009205	purine ribonucleoside triphosphate metabolic process	83	4	AGAP000523,AGAP004616,AGAP028366,AGAP028371,	4.8	7.33	8.06	0.00212509	0.0310795	0.994544	2.67262
GO:0009144	purine nucleoside triphosphate metabolic process	83	4	AGAP000523,AGAP004616,AGAP028366,AGAP028371,	4.8	7.33	8.06	0.00212509	0.0310795	0.994544	2.67262
GO:0070925	organelle assembly	205	6	AGAP002395,AGAP003556,AGAP003592,AGAP006037,AGAP009031,AGAP010273,	2.9	4.45	4.9	0.00222087	0.031496	1	2.65348
GO:1901564	organonitrogen compound metabolic process	2579	28	AGAP000523,AGAP000654,AGAP000952,AGAP002395,AGAP002437,AGAP002921,AGAP003025,AGAP003556,AGAP003592,AGAP003768,AGAP004616,AGAP004919,AGAP005061,AGAP005427,AGAP005991,AGAP006037,AGAP007493,AGAP009031,AGAP009998,AGAP010173,AGAP010591,AGAP011244,AGAP011706,AGAP011872,AGAP012100,AGAP012140,AGAP028366,AGAP028371,	1.1	1.65	2.11	0.00236263	0.0323567	1	2.6266
GO:0009199	ribonucleoside triphosphate metabolic process	86	4	AGAP000523,AGAP004616,AGAP028366,AGAP028371,	4.7	7.08	7.77	0.00241984	0.0323567	1	2.61621
GO:0009141	nucleoside triphosphate metabolic process	90	4	AGAP000523,AGAP004616,AGAP028366,AGAP028371,	4.4	6.76	7.4	0.00285509	0.0371161	1	2.54438
GO:0010608	posttranscriptional regulation of gene expression	93	4	AGAP005061,AGAP010173,AGAP012140,AGAP012708,	4.3	6.54	7.15	0.00321476	0.0406623	1	2.49285
GO:0006450	regulation of translational fidelity	14	2	AGAP005061,AGAP012708,	14.3	21.74	25.92	0.00368111	0.0453357	1	2.43402
GO:1902600	proton transmembrane transport	101	4	AGAP000523,AGAP004616,AGAP028366,AGAP028371,	4	6.03	6.56	0.00432261	0.051104	1	2.36425
GO:0009126	purine nucleoside monophosphate metabolic process	102	4	AGAP000523,AGAP004616,AGAP028366,AGAP028371,	3.9	5.97	6.49	0.00447706	0.051104	1	2.34901
GO:0009167	purine ribonucleoside monophosphate metabolic process	102	4	AGAP000523,AGAP004616,AGAP028366,AGAP028371,	3.9	5.97	6.49	0.00447706	0.051104	1	2.34901
GO:0034250	positive regulation of cellular amide metabolic process	16	2	AGAP005061,AGAP012708,	12.5	19.02	22.21	0.00481322	0.0523858	1	2.31756
GO:0045727	positive regulation of translation	16	2	AGAP005061,AGAP012708,	12.5	19.02	22.21	0.00481322	0.0523858	1	2.31756
GO:0008152	metabolic process	4248	39	AGAP000523,AGAP000654,AGAP000952,AGAP002395,AGAP002437,AGAP002552,AGAP002921,AGAP003025,AGAP003099,AGAP003556,AGAP003592,AGAP003768,AGAP004307,AGAP004616,AGAP004746,AGAP004919,AGAP005061,AGAP005427,AGAP005549,AGAP005991,AGAP006037,AGAP007493,AGAP008020,AGAP009031,AGAP009075,AGAP009998,AGAP010173,AGAP010273,AGAP010552,AGAP010591,AGAP011244,AGAP011706,AGAP011872,AGAP012100,AGAP012140,AGAP012445,AGA…	0.9	1.4	1.92	0.0049679	0.0528404	1	2.30383
GO:0009161	ribonucleoside monophosphate metabolic process	108	4	AGAP000523,AGAP004616,AGAP028366,AGAP028371,	3.7	5.64	6.11	0.00548255	0.0570185	1	2.26102
GO:0034963	box C/D snoRNA processing	1	1	AGAP011244,	100	152.16	inf	0.00657205	0.0615144	1	2.1823
GO:0033967	box C/D snoRNA metabolic process	1	1	AGAP011244,	100	152.16	inf	0.00657205	0.0615144	1	2.1823
GO:1990258	histone glutamine methylation	1	1	AGAP011244,	100	152.16	inf	0.00657205	0.0615144	1	2.1823
GO:0000494	box C/D snoRNA 3'-end processing	1	1	AGAP011244,	100	152.16	inf	0.00657205	0.0615144	1	2.1823
GO:0040037	negative regulation of fibroblast growth factor receptor signaling pathway	1	1	AGAP004823,	100	152.16	inf	0.00657205	0.0615144	1	2.1823
GO:0009123	nucleoside monophosphate metabolic process	117	4	AGAP000523,AGAP004616,AGAP028366,AGAP028371,	3.4	5.2	5.62	0.00725798	0.0666026	1	2.13918
GO:0071704	organic substance metabolic process	3780	35	AGAP000523,AGAP000654,AGAP000952,AGAP002395,AGAP002437,AGAP002921,AGAP003025,AGAP003099,AGAP003556,AGAP003592,AGAP003768,AGAP004307,AGAP004616,AGAP004746,AGAP004919,AGAP005061,AGAP005427,AGAP005549,AGAP005991,AGAP006037,AGAP007493,AGAP009031,AGAP009075,AGAP009998,AGAP010173,AGAP010273,AGAP010591,AGAP011244,AGAP011706,AGAP011872,AGAP012100,AGAP012140,AGAP012445,AGAP028366,AGAP028371,	0.9	1.41	1.84	0.00843268	0.0749184	1	2.07403
GO:0044238	primary metabolic process	3497	33	AGAP000523,AGAP000654,AGAP000952,AGAP002395,AGAP002437,AGAP002921,AGAP003025,AGAP003556,AGAP003592,AGAP003768,AGAP004307,AGAP004616,AGAP004919,AGAP005061,AGAP005427,AGAP005549,AGAP005991,AGAP006037,AGAP007493,AGAP009031,AGAP009075,AGAP009998,AGAP010173,AGAP010273,AGAP010591,AGAP011244,AGAP011706,AGAP011872,AGAP012100,AGAP012140,AGAP012445,AGAP028366,AGAP028371,	0.9	1.44	1.84	0.00848435	0.0749184	1	2.07138
GO:0006414	translational elongation	22	2	AGAP003025,AGAP010173,	9.1	13.83	15.54	0.00903319	0.0782876	1	2.04416
GO:0015986	ATP synthesis coupled proton transport	23	2	AGAP000523,AGAP004616,	8.7	13.23	14.8	0.00985179	0.0823328	1	2.00648
GO:0015985	energy coupled proton transport, down electrochemical gradient	23	2	AGAP000523,AGAP004616,	8.7	13.23	14.8	0.00985179	0.0823328	1	2.00648
GO:0044085	cellular component biogenesis	656	10	AGAP002395,AGAP002437,AGAP003556,AGAP003592,AGAP005991,AGAP006037,AGAP009031,AGAP010273,AGAP011244,AGAP012140,	1.5	2.32	2.57	0.0101556	0.0833831	1	1.99329
GO:0045333	cellular respiration	70	3	AGAP010552,AGAP028366,AGAP028371,	4.3	6.52	7.03	0.0108643	0.0876635	1	1.964
GO:0043170	macromolecule metabolic process	2863	28	AGAP000654,AGAP000952,AGAP002395,AGAP002437,AGAP002921,AGAP003025,AGAP003556,AGAP003592,AGAP003768,AGAP004307,AGAP004746,AGAP004919,AGAP005061,AGAP005427,AGAP005549,AGAP005991,AGAP006037,AGAP007493,AGAP009031,AGAP009075,AGAP009998,AGAP010173,AGAP010591,AGAP011244,AGAP011706,AGAP011872,AGAP012100,AGAP012140,	1	1.49	1.83	0.0111956	0.088806	1	1.95095
GO:0046487	glyoxylate metabolic process	2	1	AGAP003099,	50	76.08	153.37	0.0131015	0.0943311	1	1.88268
GO:0051058	negative regulation of small GTPase mediated signal transduction	2	1	AGAP004823,	50	76.08	153.37	0.0131015	0.0943311	1	1.88268
GO:0018364	peptidyl-glutamine methylation	2	1	AGAP011244,	50	76.08	153.37	0.0131015	0.0943311	1	1.88268
GO:0046580	negative regulation of Ras protein signal transduction	2	1	AGAP004823,	50	76.08	153.37	0.0131015	0.0943311	1	1.88268
GO:0016095	polyprenol catabolic process	2	1	AGAP007493,	50	76.08	153.37	0.0131015	0.0943311	1	1.88268
GO:0040036	regulation of fibroblast growth factor receptor signaling pathway	2	1	AGAP004823,	50	76.08	153.37	0.0131015	0.0943311	1	1.88268
GO:0034622	cellular protein-containing complex assembly	300	6	AGAP002395,AGAP003556,AGAP003592,AGAP006037,AGAP009031,AGAP012140,	2	3.04	3.28	0.0137518	0.0975127	1	1.86164
GO:0006807	nitrogen compound metabolic process	3341	31	AGAP000523,AGAP000654,AGAP000952,AGAP002395,AGAP002437,AGAP002921,AGAP003025,AGAP003556,AGAP003592,AGAP003768,AGAP004307,AGAP004616,AGAP004919,AGAP005061,AGAP005427,AGAP005549,AGAP005991,AGAP006037,AGAP007493,AGAP009031,AGAP009075,AGAP009998,AGAP010173,AGAP010591,AGAP011244,AGAP011706,AGAP011872,AGAP012100,AGAP012140,AGAP028366,AGAP028371,	0.9	1.41	1.75	0.0150583	0.105184	1	1.82222
GO:0022900	electron transport chain	80	3	AGAP010552,AGAP028366,AGAP028371,	3.8	5.71	6.11	0.0155669	0.107137	1	1.8078
GO:0015980	energy derivation by oxidation of organic compounds	81	3	AGAP010552,AGAP028366,AGAP028371,	3.7	5.64	6.03	0.0160909	0.109138	1	1.79342
GO:0008300	isoprenoid catabolic process	3	1	AGAP007493,	33.3	50.72	76.68	0.0195887	0.122637	1	1.70799
GO:0019408	dolichol biosynthetic process	3	1	AGAP007493,	33.3	50.72	76.68	0.0195887	0.122637	1	1.70799
GO:0072344	rescue of stalled ribosome	3	1	AGAP010173,	33.3	50.72	76.68	0.0195887	0.122637	1	1.70799
GO:0006610	ribosomal protein import into nucleus	3	1	AGAP003769,	33.3	50.72	76.68	0.0195887	0.122637	1	1.70799
GO:0015866	ADP transport	3	1	AGAP002358,	33.3	50.72	76.68	0.0195887	0.122637	1	1.70799
GO:0065003	protein-containing complex assembly	325	6	AGAP002395,AGAP003556,AGAP003592,AGAP006037,AGAP009031,AGAP012140,	1.8	2.81	3.02	0.0196534	0.122637	1	1.70656
GO:0006754	ATP biosynthetic process	35	2	AGAP000523,AGAP004616,	5.7	8.69	9.4	0.0220275	0.135643	1	1.65703
GO:0009150	purine ribonucleotide metabolic process	168	4	AGAP000523,AGAP004616,AGAP028366,AGAP028371,	2.4	3.62	3.85	0.0244594	0.141673	1	1.61155
GO:0006163	purine nucleotide metabolic process	170	4	AGAP000523,AGAP004616,AGAP028366,AGAP028371,	2.4	3.58	3.81	0.0254088	0.141673	1	1.59502
GO:0009145	purine nucleoside triphosphate biosynthetic process	38	2	AGAP000523,AGAP004616,	5.3	8.01	8.62	0.0257003	0.141673	1	1.59006
GO:0009206	purine ribonucleoside triphosphate biosynthetic process	38	2	AGAP000523,AGAP004616,	5.3	8.01	8.62	0.0257003	0.141673	1	1.59006
GO:0019348	dolichol metabolic process	4	1	AGAP007493,	25	38.04	51.11	0.0260339	0.141673	1	1.58446
GO:0015867	ATP transport	4	1	AGAP002358,	25	38.04	51.11	0.0260339	0.141673	1	1.58446
GO:0036092	phosphatidylinositol-3-phosphate biosynthetic process	4	1	AGAP010273,	25	38.04	51.11	0.0260339	0.141673	1	1.58446
GO:0043407	negative regulation of MAP kinase activity	4	1	AGAP004823,	25	38.04	51.11	0.0260339	0.141673	1	1.58446
GO:0019731	antibacterial humoral response	4	1	AGAP000694,	25	38.04	51.11	0.0260339	0.141673	1	1.58446
GO:0030242	autophagy of peroxisome	4	1	AGAP010273,	25	38.04	51.11	0.0260339	0.141673	1	1.58446
GO:0046578	regulation of Ras protein signal transduction	39	2	AGAP004823,AGAP008906,	5.1	7.8	8.38	0.0269762	0.143464	1	1.56902
GO:0042773	ATP synthesis coupled electron transport	39	2	AGAP028366,AGAP028371,	5.1	7.8	8.38	0.0269762	0.143464	1	1.56902
GO:0009259	ribonucleotide metabolic process	176	4	AGAP000523,AGAP004616,AGAP028366,AGAP028371,	2.3	3.46	3.67	0.0283899	0.149286	1	1.54684
GO:0006119	oxidative phosphorylation	41	2	AGAP028366,AGAP028371,	4.9	7.42	7.95	0.0296032	0.152245	1	1.52866
GO:0009201	ribonucleoside triphosphate biosynthetic process	41	2	AGAP000523,AGAP004616,	4.9	7.42	7.95	0.0296032	0.152245	1	1.52866
GO:0009142	nucleoside triphosphate biosynthetic process	43	2	AGAP000523,AGAP004616,	4.7	7.08	7.56	0.0323279	0.163233	1	1.49042
GO:0016094	polyprenol biosynthetic process	5	1	AGAP007493,	20	30.43	38.33	0.0324373	0.163233	1	1.48896
GO:0015672	monovalent inorganic cation transport	185	4	AGAP000523,AGAP004616,AGAP028366,AGAP028371,	2.2	3.29	3.48	0.033239	0.165488	1	1.47835
GO:0043933	protein-containing complex subunit organization	372	6	AGAP002395,AGAP003556,AGAP003592,AGAP006037,AGAP009031,AGAP012140,	1.6	2.45	2.62	0.0350359	0.172598	1	1.45549
GO:0022904	respiratory electron transport chain	46	2	AGAP028366,AGAP028371,	4.3	6.62	7.05	0.036592	0.178386	1	1.43661
GO:0019637	organophosphate metabolic process	381	6	AGAP000523,AGAP004616,AGAP010273,AGAP012445,AGAP028366,AGAP028371,	1.6	2.4	2.55	0.038678	0.179694	1	1.41254
GO:0016093	polyprenol metabolic process	6	1	AGAP007493,	16.7	25.36	30.66	0.0387992	0.179694	1	1.41118
GO:0000012	single strand break repair	6	1	AGAP004307,	16.7	25.36	30.66	0.0387992	0.179694	1	1.41118
GO:0090288	negative regulation of cellular response to growth factor stimulus	6	1	AGAP004823,	16.7	25.36	30.66	0.0387992	0.179694	1	1.41118
GO:0043409	negative regulation of MAPK cascade	6	1	AGAP004823,	16.7	25.36	30.66	0.0387992	0.179694	1	1.41118
GO:0072521	purine-containing compound metabolic process	195	4	AGAP000523,AGAP004616,AGAP028366,AGAP028371,	2.1	3.12	3.3	0.0391641	0.179694	1	1.40711
GO:0051056	regulation of small GTPase mediated signal transduction	48	2	AGAP004823,AGAP008906,	4.2	6.34	6.74	0.0395485	0.179696	1	1.40287
GO:0019693	ribose phosphate metabolic process	198	4	AGAP000523,AGAP004616,AGAP028366,AGAP028371,	2	3.07	3.25	0.0410526	0.184737	1	1.38666
GO:0032270	positive regulation of cellular protein metabolic process	117	3	AGAP005061,AGAP010173,AGAP012708,	2.6	3.9	4.11	0.0415585	0.185232	1	1.38134
GO:0009127	purine nucleoside monophosphate biosynthetic process	50	2	AGAP000523,AGAP004616,	4	6.09	6.46	0.0425927	0.186293	1	1.37066
GO:0009168	purine ribonucleoside monophosphate biosynthetic process	50	2	AGAP000523,AGAP004616,	4	6.09	6.46	0.0425927	0.186293	1	1.37066
GO:0032012	regulation of ARF protein signal transduction	7	1	AGAP008906,	14.3	21.74	25.55	0.0451199	0.186868	1	1.34563
GO:0050829	defense response to Gram-negative bacterium	7	1	AGAP000694,	14.3	21.74	25.55	0.0451199	0.186868	1	1.34563
GO:0015868	purine ribonucleotide transport	7	1	AGAP002358,	14.3	21.74	25.55	0.0451199	0.186868	1	1.34563
GO:0071901	negative regulation of protein serine/threonine kinase activity	7	1	AGAP004823,	14.3	21.74	25.55	0.0451199	0.186868	1	1.34563
GO:0015865	purine nucleotide transport	7	1	AGAP002358,	14.3	21.74	25.55	0.0451199	0.186868	1	1.34563
GO:0051503	adenine nucleotide transport	7	1	AGAP002358,	14.3	21.74	25.55	0.0451199	0.186868	1	1.34563
GO:0032268	regulation of cellular protein metabolic process	300	5	AGAP004823,AGAP005061,AGAP010173,AGAP012140,AGAP012708,	1.7	2.54	2.68	0.0469775	0.192855	1	1.32811
GO:0022607	cellular component assembly	507	7	AGAP002395,AGAP003556,AGAP003592,AGAP006037,AGAP009031,AGAP010273,AGAP012140,	1.4	2.1	2.24	0.0480787	0.195659	1	1.31805
GO:0009987	cellular process	5121	41	AGAP000523,AGAP000654,AGAP000952,AGAP001175,AGAP002395,AGAP002437,AGAP002921,AGAP003025,AGAP003099,AGAP003556,AGAP003592,AGAP003768,AGAP003939,AGAP004307,AGAP004616,AGAP004919,AGAP005061,AGAP005427,AGAP005549,AGAP005930,AGAP005991,AGAP006037,AGAP007493,AGAP009031,AGAP009075,AGAP009998,AGAP010173,AGAP010273,AGAP010552,AGAP010591,AGAP011244,AGAP011706,AGAP011872,AGAP012100,AGAP012140,AGAP012445,AGA…	0.8	1.22	1.54	0.0488992	0.195751	1	1.3107
GO:0051247	positive regulation of protein metabolic process	125	3	AGAP005061,AGAP010173,AGAP012708,	2.4	3.65	3.84	0.0489379	0.195751	1	1.31036

## Sheet: AeAeg_MSRG_GO
Genic piRCLs GO terms in AeAeg
ID	Name	Bgd count	Result count	Result gene list	Pct of bgd	Fold enrichment	Odds ratio	P-value	Benjamini	Bonferroni	Neg-logpval
GO:0044271	cellular nitrogen compound biosynthetic process	622	27	AAEL000010,AAEL000501,AAEL000517,AAEL001246,AAEL001759,AAEL002534,AAEL002832,AAEL003673,AAEL003689,AAEL004500,AAEL006115,AAEL008188,AAEL009506,AAEL010168,AAEL010299,AAEL011656,AAEL012629,AAEL013221,AAEL015006,AAEL017096,AAEL020238,AAEL020749,AAEL021140,AAEL021350,AAEL025553,AAEL027325,AAEL028043,	4.3	4.3	5.54	6.66311e-11	1.07313e-08	2.59195e-08	10.1763
GO:0006412	translation	254	18	AAEL000010,AAEL001759,AAEL002534,AAEL002832,AAEL004500,AAEL006115,AAEL008188,AAEL009506,AAEL010168,AAEL010299,AAEL011656,AAEL013221,AAEL015006,AAEL017096,AAEL020238,AAEL020749,AAEL025553,AAEL028043,	7.1	7.02	8.72	6.81562e-11	1.07313e-08	2.65128e-08	10.1665
GO:0043043	peptide biosynthetic process	257	18	AAEL000010,AAEL001759,AAEL002534,AAEL002832,AAEL004500,AAEL006115,AAEL008188,AAEL009506,AAEL010168,AAEL010299,AAEL011656,AAEL013221,AAEL015006,AAEL017096,AAEL020238,AAEL020749,AAEL025553,AAEL028043,	7	6.94	8.61	8.27605e-11	1.07313e-08	3.21938e-08	10.0822
GO:0043604	amide biosynthetic process	271	18	AAEL000010,AAEL001759,AAEL002534,AAEL002832,AAEL004500,AAEL006115,AAEL008188,AAEL009506,AAEL010168,AAEL010299,AAEL011656,AAEL013221,AAEL015006,AAEL017096,AAEL020238,AAEL020749,AAEL025553,AAEL028043,	6.6	6.58	8.12	1.97981e-10	1.62352e-08	7.70147e-08	9.70338
GO:0043603	cellular amide metabolic process	308	19	AAEL000010,AAEL001645,AAEL001759,AAEL002534,AAEL002832,AAEL004500,AAEL006115,AAEL008188,AAEL009506,AAEL010168,AAEL010299,AAEL011656,AAEL013221,AAEL015006,AAEL017096,AAEL020238,AAEL020749,AAEL025553,AAEL028043,	6.2	6.11	7.56	2.08679e-10	1.62352e-08	8.11761e-08	9.68052
GO:0006518	peptide metabolic process	275	18	AAEL000010,AAEL001759,AAEL002534,AAEL002832,AAEL004500,AAEL006115,AAEL008188,AAEL009506,AAEL010168,AAEL010299,AAEL011656,AAEL013221,AAEL015006,AAEL017096,AAEL020238,AAEL020749,AAEL025553,AAEL028043,	6.5	6.48	7.99	2.51563e-10	1.63097e-08	9.78581e-08	9.59935
GO:0034645	cellular macromolecule biosynthetic process	604	25	AAEL000010,AAEL000501,AAEL000517,AAEL001759,AAEL002534,AAEL002832,AAEL003673,AAEL003689,AAEL004500,AAEL006115,AAEL008188,AAEL009506,AAEL010168,AAEL010299,AAEL011656,AAEL013221,AAEL015006,AAEL017096,AAEL020238,AAEL020749,AAEL021140,AAEL021350,AAEL025553,AAEL027325,AAEL028043,	4.1	4.1	5.16	1.05652e-09	5.31646e-08	4.10985e-07	8.97612
GO:0009059	macromolecule biosynthetic process	605	25	AAEL000010,AAEL000501,AAEL000517,AAEL001759,AAEL002534,AAEL002832,AAEL003673,AAEL003689,AAEL004500,AAEL006115,AAEL008188,AAEL009506,AAEL010168,AAEL010299,AAEL011656,AAEL013221,AAEL015006,AAEL017096,AAEL020238,AAEL020749,AAEL021140,AAEL021350,AAEL025553,AAEL027325,AAEL028043,	4.1	4.09	5.15	1.09336e-09	5.31646e-08	4.25317e-07	8.96124
GO:0010467	gene expression	710	26	AAEL000010,AAEL000501,AAEL000517,AAEL001759,AAEL002534,AAEL002832,AAEL003673,AAEL003689,AAEL004500,AAEL006115,AAEL008188,AAEL009506,AAEL010168,AAEL010299,AAEL011656,AAEL013221,AAEL015006,AAEL017096,AAEL020238,AAEL020749,AAEL020851,AAEL021350,AAEL025553,AAEL027325,AAEL027947,AAEL028043,	3.7	3.63	4.55	6.13733e-09	2.65269e-07	2.38742e-06	8.21202
GO:0034641	cellular nitrogen compound metabolic process	1189	33	AAEL000010,AAEL000428,AAEL000501,AAEL000517,AAEL001246,AAEL001645,AAEL001759,AAEL002534,AAEL002832,AAEL003673,AAEL003689,AAEL004500,AAEL006115,AAEL007844,AAEL008188,AAEL009506,AAEL010168,AAEL010299,AAEL011627,AAEL011656,AAEL012629,AAEL013221,AAEL015006,AAEL017096,AAEL020238,AAEL020749,AAEL021140,AAEL021350,AAEL025553,AAEL027325,AAEL027947,AAEL028001,AAEL028043,	2.8	2.75	3.55	3.63101e-08	1.41246e-06	1.41246e-05	7.43997
GO:0044249	cellular biosynthetic process	892	28	AAEL000010,AAEL000428,AAEL000501,AAEL000517,AAEL001246,AAEL001759,AAEL002534,AAEL002832,AAEL003673,AAEL003689,AAEL004500,AAEL006115,AAEL008188,AAEL009506,AAEL010168,AAEL010299,AAEL011656,AAEL012629,AAEL013221,AAEL015006,AAEL017096,AAEL020238,AAEL020749,AAEL021140,AAEL021350,AAEL025553,AAEL027325,AAEL028043,	3.1	3.11	3.9	4.09653e-08	1.44868e-06	1.59355e-05	7.38758
GO:1901576	organic substance biosynthetic process	919	28	AAEL000010,AAEL000428,AAEL000501,AAEL000517,AAEL001246,AAEL001759,AAEL002534,AAEL002832,AAEL003673,AAEL003689,AAEL004500,AAEL006115,AAEL008188,AAEL009506,AAEL010168,AAEL010299,AAEL011656,AAEL012629,AAEL013221,AAEL015006,AAEL017096,AAEL020238,AAEL020749,AAEL021140,AAEL021350,AAEL025553,AAEL027325,AAEL028043,	3	3.02	3.77	7.72986e-08	2.50576e-06	3.00692e-05	7.11183
GO:0009058	biosynthetic process	955	28	AAEL000010,AAEL000428,AAEL000501,AAEL000517,AAEL001246,AAEL001759,AAEL002534,AAEL002832,AAEL003673,AAEL003689,AAEL004500,AAEL006115,AAEL008188,AAEL009506,AAEL010168,AAEL010299,AAEL011656,AAEL012629,AAEL013221,AAEL015006,AAEL017096,AAEL020238,AAEL020749,AAEL021140,AAEL021350,AAEL025553,AAEL027325,AAEL028043,	2.9	2.9	3.62	1.73312e-07	5.18603e-06	6.74184e-05	6.76117
GO:1901566	organonitrogen compound biosynthetic process	516	20	AAEL000010,AAEL001246,AAEL001759,AAEL002534,AAEL002832,AAEL004500,AAEL006115,AAEL008188,AAEL009506,AAEL010168,AAEL010299,AAEL011656,AAEL012629,AAEL013221,AAEL015006,AAEL017096,AAEL020238,AAEL020749,AAEL025553,AAEL028043,	3.9	3.84	4.6	1.87278e-07	5.20366e-06	7.28512e-05	6.72751
GO:0044260	cellular macromolecule metabolic process	1419	34	AAEL000010,AAEL000501,AAEL000517,AAEL001759,AAEL002401,AAEL002534,AAEL002832,AAEL003673,AAEL003689,AAEL004500,AAEL006115,AAEL006259,AAEL007844,AAEL008188,AAEL008770,AAEL009042,AAEL009160,AAEL009506,AAEL010168,AAEL010299,AAEL011656,AAEL011877,AAEL013221,AAEL013236,AAEL015006,AAEL017096,AAEL020238,AAEL020749,AAEL021140,AAEL021350,AAEL025553,AAEL027325,AAEL027947,AAEL028043,	2.4	2.37	3.02	7.43413e-07	1.92792e-05	0.000289188	6.12877
GO:0006807	nitrogen compound metabolic process	2680	50	AAEL000010,AAEL000428,AAEL000501,AAEL000517,AAEL000801,AAEL001246,AAEL001645,AAEL001759,AAEL002401,AAEL002534,AAEL002832,AAEL003673,AAEL003689,AAEL004500,AAEL006115,AAEL006259,AAEL007844,AAEL008188,AAEL008770,AAEL009042,AAEL009160,AAEL009506,AAEL010168,AAEL010299,AAEL011627,AAEL011656,AAEL011877,AAEL012629,AAEL012641,AAEL012642,AAEL013032,AAEL013221,AAEL013236,AAEL014571,AAEL015006,AAEL015527,AAE…	1.9	1.85	2.56	1.49083e-06	3.62458e-05	0.000579933	5.82657
GO:1901564	organonitrogen compound metabolic process	1998	41	AAEL000010,AAEL000428,AAEL000801,AAEL001246,AAEL001645,AAEL001759,AAEL002401,AAEL002534,AAEL002832,AAEL004500,AAEL006115,AAEL006259,AAEL008188,AAEL008770,AAEL009042,AAEL009160,AAEL009506,AAEL010168,AAEL010299,AAEL011627,AAEL011656,AAEL011877,AAEL012629,AAEL012641,AAEL012642,AAEL013032,AAEL013221,AAEL013236,AAEL014571,AAEL015006,AAEL015527,AAEL017096,AAEL019698,AAEL020238,AAEL020749,AAEL020851,AAE…	2.1	2.03	2.66	2.15941e-06	4.94124e-05	0.00084001	5.66566
GO:0044267	cellular protein metabolic process	982	26	AAEL000010,AAEL001759,AAEL002401,AAEL002534,AAEL002832,AAEL004500,AAEL006115,AAEL006259,AAEL008188,AAEL008770,AAEL009042,AAEL009160,AAEL009506,AAEL010168,AAEL010299,AAEL011656,AAEL011877,AAEL013221,AAEL013236,AAEL015006,AAEL017096,AAEL020238,AAEL020749,AAEL025553,AAEL027947,AAEL028043,	2.6	2.62	3.17	3.65219e-06	7.89279e-05	0.0014207	5.43745
GO:0044237	cellular metabolic process	2414	45	AAEL000010,AAEL000428,AAEL000501,AAEL000517,AAEL001246,AAEL001645,AAEL001759,AAEL002401,AAEL002534,AAEL002832,AAEL003673,AAEL003689,AAEL004500,AAEL006115,AAEL006259,AAEL007844,AAEL008188,AAEL008770,AAEL009042,AAEL009160,AAEL009506,AAEL009524,AAEL010168,AAEL010299,AAEL011627,AAEL011656,AAEL011877,AAEL012629,AAEL012641,AAEL012642,AAEL013069,AAEL013221,AAEL013236,AAEL015006,AAEL017096,AAEL019698,AAE…	1.9	1.85	2.44	7.60006e-06	0.000155601	0.00295642	5.11918
GO:0043170	macromolecule metabolic process	2375	44	AAEL000010,AAEL000501,AAEL000517,AAEL000801,AAEL001759,AAEL002401,AAEL002534,AAEL002832,AAEL003673,AAEL003689,AAEL004500,AAEL006115,AAEL006259,AAEL007844,AAEL008188,AAEL008770,AAEL009042,AAEL009160,AAEL009506,AAEL010168,AAEL010299,AAEL011656,AAEL011877,AAEL012641,AAEL012642,AAEL013032,AAEL013221,AAEL013236,AAEL014571,AAEL015006,AAEL015527,AAEL017096,AAEL019698,AAEL020238,AAEL020749,AAEL020851,AAE…	1.9	1.83	2.4	1.21654e-05	0.000236617	0.00473235	4.91487
GO:0071704	organic substance metabolic process	3095	52	AAEL000010,AAEL000428,AAEL000501,AAEL000517,AAEL000801,AAEL001246,AAEL001645,AAEL001759,AAEL002401,AAEL002534,AAEL002832,AAEL003673,AAEL003689,AAEL004500,AAEL006115,AAEL006259,AAEL007844,AAEL008188,AAEL008451,AAEL008770,AAEL009042,AAEL009160,AAEL009506,AAEL009524,AAEL010168,AAEL010299,AAEL011627,AAEL011656,AAEL011877,AAEL012629,AAEL012641,AAEL012642,AAEL013032,AAEL013221,AAEL013236,AAEL014571,AAE…	1.7	1.66	2.26	2.07107e-05	0.000383642	0.00805648	4.6838
GO:0019538	protein metabolic process	1597	33	AAEL000010,AAEL000801,AAEL001759,AAEL002401,AAEL002534,AAEL002832,AAEL004500,AAEL006115,AAEL006259,AAEL008188,AAEL008770,AAEL009042,AAEL009160,AAEL009506,AAEL010168,AAEL010299,AAEL011656,AAEL011877,AAEL013032,AAEL013221,AAEL013236,AAEL014571,AAEL015006,AAEL015527,AAEL017096,AAEL020238,AAEL020749,AAEL020851,AAEL022505,AAEL023069,AAEL025553,AAEL027947,AAEL028043,	2.1	2.05	2.52	2.87131e-05	0.0005077	0.0111694	4.54192
GO:0044238	primary metabolic process	2891	49	AAEL000010,AAEL000428,AAEL000501,AAEL000517,AAEL000801,AAEL001246,AAEL001645,AAEL001759,AAEL002401,AAEL002534,AAEL002832,AAEL003673,AAEL003689,AAEL004500,AAEL006115,AAEL006259,AAEL007844,AAEL008188,AAEL008451,AAEL008770,AAEL009042,AAEL009160,AAEL009506,AAEL009524,AAEL010168,AAEL010299,AAEL011627,AAEL011656,AAEL011877,AAEL012629,AAEL013032,AAEL013221,AAEL013236,AAEL014571,AAEL015006,AAEL015527,AAE…	1.7	1.68	2.23	3.49188e-05	0.000590583	0.0135834	4.45694
GO:1901565	organonitrogen compound catabolic process	149	8	AAEL000428,AAEL002401,AAEL008770,AAEL009042,AAEL009160,AAEL012629,AAEL013236,AAEL023069,	5.4	5.32	5.91	0.000128433	0.00208168	0.0499603	3.89132
GO:0030163	protein catabolic process	89	6	AAEL002401,AAEL008770,AAEL009042,AAEL009160,AAEL013236,AAEL023069,	6.7	6.68	7.43	0.000272491	0.00377842	0.105999	3.56465
GO:0009221	pyrimidine deoxyribonucleotide biosynthetic process	3	2	AAEL001246,AAEL012629,	66.7	66.03	199.64	0.000301108	0.00377842	0.117131	3.52128
GO:0019692	deoxyribose phosphate metabolic process	3	2	AAEL001246,AAEL012629,	66.7	66.03	199.64	0.000301108	0.00377842	0.117131	3.52128
GO:0009394	2'-deoxyribonucleotide metabolic process	3	2	AAEL001246,AAEL012629,	66.7	66.03	199.64	0.000301108	0.00377842	0.117131	3.52128
GO:0009265	2'-deoxyribonucleotide biosynthetic process	3	2	AAEL001246,AAEL012629,	66.7	66.03	199.64	0.000301108	0.00377842	0.117131	3.52128
GO:0046385	deoxyribose phosphate biosynthetic process	3	2	AAEL001246,AAEL012629,	66.7	66.03	199.64	0.000301108	0.00377842	0.117131	3.52128
GO:0009219	pyrimidine deoxyribonucleotide metabolic process	3	2	AAEL001246,AAEL012629,	66.7	66.03	199.64	0.000301108	0.00377842	0.117131	3.52128
GO:0008152	metabolic process	3737	55	AAEL000010,AAEL000428,AAEL000501,AAEL000517,AAEL000801,AAEL001246,AAEL001645,AAEL001759,AAEL002401,AAEL002483,AAEL002534,AAEL002832,AAEL003673,AAEL003689,AAEL004500,AAEL006115,AAEL006259,AAEL007844,AAEL008188,AAEL008451,AAEL008770,AAEL009042,AAEL009160,AAEL009506,AAEL009524,AAEL010168,AAEL010299,AAEL011627,AAEL011656,AAEL011877,AAEL012629,AAEL012641,AAEL012642,AAEL012932,AAEL013032,AAEL013069,AAE…	1.5	1.46	1.91	0.000501908	0.00610132	0.195242	3.29938
GO:0048599	oocyte development	4	2	AAEL013027,AAEL017403,	50	49.52	99.81	0.000598237	0.00684454	0.232714	3.22313
GO:0009994	oocyte differentiation	4	2	AAEL013027,AAEL017403,	50	49.52	99.81	0.000598237	0.00684454	0.232714	3.22313
GO:0009987	cellular process	3691	54	AAEL000010,AAEL000301,AAEL000428,AAEL000501,AAEL000517,AAEL001246,AAEL001645,AAEL001759,AAEL002401,AAEL002534,AAEL002832,AAEL003673,AAEL003689,AAEL004500,AAEL005567,AAEL006115,AAEL006259,AAEL006642,AAEL006887,AAEL007844,AAEL008188,AAEL008770,AAEL009042,AAEL009160,AAEL009506,AAEL009524,AAEL010168,AAEL010299,AAEL011627,AAEL011656,AAEL011877,AAEL012629,AAEL012641,AAEL012642,AAEL013027,AAEL013069,AAE…	1.5	1.45	1.88	0.000702546	0.00780829	0.27329	3.15333
GO:0009263	deoxyribonucleotide biosynthetic process	5	2	AAEL001246,AAEL012629,	40	39.62	66.53	0.00099048	0.0107027	0.385297	3.00415
GO:0051603	proteolysis involved in cellular protein catabolic process	81	5	AAEL002401,AAEL008770,AAEL009042,AAEL009160,AAEL013236,	6.2	6.11	6.7	0.00133568	0.0140427	0.519579	2.8743
GO:0044257	cellular protein catabolic process	82	5	AAEL002401,AAEL008770,AAEL009042,AAEL009160,AAEL013236,	6.1	6.04	6.62	0.00141112	0.0144454	0.548926	2.85044
GO:0009262	deoxyribonucleotide metabolic process	6	2	AAEL001246,AAEL012629,	33.3	33.01	49.9	0.00147592	0.0147213	0.574132	2.83094
GO:0006352	DNA-templated transcription, initiation	129	6	AAEL000501,AAEL000517,AAEL003673,AAEL003689,AAEL021350,AAEL027325,	4.7	4.61	5	0.00192644	0.0187347	0.749386	2.71524
GO:0009057	macromolecule catabolic process	135	6	AAEL002401,AAEL008770,AAEL009042,AAEL009160,AAEL013236,AAEL023069,	4.4	4.4	4.76	0.00242325	0.0229913	0.942644	2.6156
GO:0022613	ribonucleoprotein complex biogenesis	94	5	AAEL005722,AAEL006115,AAEL006887,AAEL010821,AAEL020238,	5.3	5.27	5.72	0.00258026	0.0238981	1	2.58834
GO:0019438	aromatic compound biosynthetic process	356	10	AAEL000428,AAEL000501,AAEL000517,AAEL001246,AAEL003673,AAEL003689,AAEL012629,AAEL021140,AAEL021350,AAEL027325,	2.8	2.78	3.01	0.0031692	0.0286702	1	2.49905
GO:0042255	ribosome assembly	9	2	AAEL006887,AAEL020238,	22.2	22.01	28.5	0.00347267	0.0307016	1	2.45934
GO:0018130	heterocycle biosynthetic process	366	10	AAEL000428,AAEL000501,AAEL000517,AAEL001246,AAEL003673,AAEL003689,AAEL012629,AAEL021140,AAEL021350,AAEL027325,	2.7	2.71	2.93	0.00385857	0.0327371	1	2.41357
GO:0042254	ribosome biogenesis	64	4	AAEL005722,AAEL006887,AAEL010821,AAEL020238,	6.3	6.19	6.74	0.00392833	0.0327371	1	2.40579
GO:1901575	organic substance catabolic process	252	8	AAEL000428,AAEL002401,AAEL008770,AAEL009042,AAEL009160,AAEL012629,AAEL013236,AAEL023069,	3.2	3.14	3.38	0.00395539	0.0327371	1	2.40281
GO:1901362	organic cyclic compound biosynthetic process	375	10	AAEL000428,AAEL000501,AAEL000517,AAEL001246,AAEL003673,AAEL003689,AAEL012629,AAEL021140,AAEL021350,AAEL027325,	2.7	2.64	2.85	0.00457635	0.0370875	1	2.33948
GO:0006313	transposition, DNA-mediated	11	2	AAEL007844,AAEL027947,	18.2	18.01	22.17	0.00523594	0.0391689	1	2.281
GO:0007292	female gamete generation	11	2	AAEL013027,AAEL017403,	18.2	18.01	22.17	0.00523594	0.0391689	1	2.281
GO:0048477	oogenesis	11	2	AAEL013027,AAEL017403,	18.2	18.01	22.17	0.00523594	0.0391689	1	2.281
GO:0032196	transposition	11	2	AAEL007844,AAEL027947,	18.2	18.01	22.17	0.00523594	0.0391689	1	2.281
GO:0034654	nucleobase-containing compound biosynthetic process	329	9	AAEL000501,AAEL000517,AAEL001246,AAEL003673,AAEL003689,AAEL012629,AAEL021140,AAEL021350,AAEL027325,	2.7	2.71	2.91	0.00601458	0.0441448	1	2.22079
GO:0009056	catabolic process	275	8	AAEL000428,AAEL002401,AAEL008770,AAEL009042,AAEL009160,AAEL012629,AAEL013236,AAEL023069,	2.9	2.88	3.09	0.00664024	0.0462061	1	2.17782
GO:0044265	cellular macromolecule catabolic process	118	5	AAEL002401,AAEL008770,AAEL009042,AAEL009160,AAEL013236,	4.2	4.2	4.49	0.00679936	0.0462061	1	2.16753
GO:0022618	ribonucleoprotein complex assembly	40	3	AAEL006115,AAEL006887,AAEL020238,	7.5	7.43	8.14	0.00754578	0.0462061	1	2.1223
GO:0071826	ribonucleoprotein complex subunit organization	40	3	AAEL006115,AAEL006887,AAEL020238,	7.5	7.43	8.14	0.00754578	0.0462061	1	2.1223
GO:0044248	cellular catabolic process	228	7	AAEL000428,AAEL002401,AAEL008770,AAEL009042,AAEL009160,AAEL012629,AAEL013236,	3.1	3.04	3.25	0.00826529	0.0462061	1	2.08274
GO:0006221	pyrimidine nucleotide biosynthetic process	15	2	AAEL001246,AAEL012629,	13.3	13.21	15.34	0.00973623	0.0462061	1	2.01161
GO:0006233	dTDP biosynthetic process	1	1	AAEL001246,	100	99.04	inf	0.0100965	0.0462061	1	1.99583
GO:0033060	ocellus pigmentation	1	1	AAEL000428,	100	99.04	inf	0.0100965	0.0462061	1	1.99583
GO:0009052	pentose-phosphate shunt, non-oxidative branch	1	1	AAEL011627,	100	99.04	inf	0.0100965	0.0462061	1	1.99583
GO:0009189	deoxyribonucleoside diphosphate biosynthetic process	1	1	AAEL001246,	100	99.04	inf	0.0100965	0.0462061	1	1.99583
GO:0009223	pyrimidine deoxyribonucleotide catabolic process	1	1	AAEL012629,	100	99.04	inf	0.0100965	0.0462061	1	1.99583
GO:0009213	pyrimidine deoxyribonucleoside triphosphate catabolic process	1	1	AAEL012629,	100	99.04	inf	0.0100965	0.0462061	1	1.99583
GO:0009211	pyrimidine deoxyribonucleoside triphosphate metabolic process	1	1	AAEL012629,	100	99.04	inf	0.0100965	0.0462061	1	1.99583
GO:0006226	dUMP biosynthetic process	1	1	AAEL012629,	100	99.04	inf	0.0100965	0.0462061	1	1.99583
GO:0009196	pyrimidine deoxyribonucleoside diphosphate metabolic process	1	1	AAEL001246,	100	99.04	inf	0.0100965	0.0462061	1	1.99583
GO:0009186	deoxyribonucleoside diphosphate metabolic process	1	1	AAEL001246,	100	99.04	inf	0.0100965	0.0462061	1	1.99583
GO:0006244	pyrimidine nucleotide catabolic process	1	1	AAEL012629,	100	99.04	inf	0.0100965	0.0462061	1	1.99583
GO:0009149	pyrimidine nucleoside triphosphate catabolic process	1	1	AAEL012629,	100	99.04	inf	0.0100965	0.0462061	1	1.99583
GO:0006727	ommochrome biosynthetic process	1	1	AAEL000428,	100	99.04	inf	0.0100965	0.0462061	1	1.99583
GO:0009197	pyrimidine deoxyribonucleoside diphosphate biosynthetic process	1	1	AAEL001246,	100	99.04	inf	0.0100965	0.0462061	1	1.99583
GO:0008055	ocellus pigment biosynthetic process	1	1	AAEL000428,	100	99.04	inf	0.0100965	0.0462061	1	1.99583
GO:0009139	pyrimidine nucleoside diphosphate biosynthetic process	1	1	AAEL001246,	100	99.04	inf	0.0100965	0.0462061	1	1.99583
GO:0046158	ocellus pigment metabolic process	1	1	AAEL000428,	100	99.04	inf	0.0100965	0.0462061	1	1.99583
GO:0009138	pyrimidine nucleoside diphosphate metabolic process	1	1	AAEL001246,	100	99.04	inf	0.0100965	0.0462061	1	1.99583
GO:0046081	dUTP catabolic process	1	1	AAEL012629,	100	99.04	inf	0.0100965	0.0462061	1	1.99583
GO:0046078	dUMP metabolic process	1	1	AAEL012629,	100	99.04	inf	0.0100965	0.0462061	1	1.99583
GO:0000028	ribosomal small subunit assembly	1	1	AAEL020238,	100	99.04	inf	0.0100965	0.0462061	1	1.99583
GO:0046080	dUTP metabolic process	1	1	AAEL012629,	100	99.04	inf	0.0100965	0.0462061	1	1.99583
GO:0046072	dTDP metabolic process	1	1	AAEL001246,	100	99.04	inf	0.0100965	0.0462061	1	1.99583
GO:0046386	deoxyribose phosphate catabolic process	1	1	AAEL012629,	100	99.04	inf	0.0100965	0.0462061	1	1.99583
GO:0000023	maltose metabolic process	1	1	AAEL009524,	100	99.04	inf	0.0100965	0.0462061	1	1.99583
GO:0046152	ommochrome metabolic process	1	1	AAEL000428,	100	99.04	inf	0.0100965	0.0462061	1	1.99583
GO:0006220	pyrimidine nucleotide metabolic process	16	2	AAEL001246,AAEL012629,	12.5	12.38	14.24	0.0110543	0.0500014	1	1.95647
GO:0097659	nucleic acid-templated transcription	187	6	AAEL000501,AAEL000517,AAEL003673,AAEL003689,AAEL021350,AAEL027325,	3.2	3.18	3.38	0.0116102	0.0513225	1	1.93516
GO:0006351	transcription, DNA-templated	187	6	AAEL000501,AAEL000517,AAEL003673,AAEL003689,AAEL021350,AAEL027325,	3.2	3.18	3.38	0.0116102	0.0513225	1	1.93516
GO:0072528	pyrimidine-containing compound biosynthetic process	17	2	AAEL001246,AAEL012629,	11.8	11.65	13.29	0.0124463	0.0539643	1	1.90496
GO:0032774	RNA biosynthetic process	190	6	AAEL000501,AAEL000517,AAEL003673,AAEL003689,AAEL021350,AAEL027325,	3.2	3.13	3.32	0.0124853	0.0539643	1	1.9036
GO:0022412	cellular process involved in reproduction in multicellular organism	19	2	AAEL013027,AAEL017403,	10.5	10.43	11.73	0.0154455	0.0653078	1	1.8112
GO:0007281	germ cell development	19	2	AAEL013027,AAEL017403,	10.5	10.43	11.73	0.0154455	0.0653078	1	1.8112
GO:0003006	developmental process involved in reproduction	20	2	AAEL013027,AAEL017403,	10	9.9	11.07	0.0170497	0.0710605	1	1.76828
GO:0009143	nucleoside triphosphate catabolic process	2	1	AAEL012629,	50	49.52	98.92	0.0200919	0.0710605	1	1.69698
GO:0009176	pyrimidine deoxyribonucleoside monophosphate metabolic process	2	1	AAEL012629,	50	49.52	98.92	0.0200919	0.0710605	1	1.69698
GO:0006726	eye pigment biosynthetic process	2	1	AAEL000428,	50	49.52	98.92	0.0200919	0.0710605	1	1.69698
GO:0043324	pigment metabolic process involved in developmental pigmentation	2	1	AAEL000428,	50	49.52	98.92	0.0200919	0.0710605	1	1.69698
GO:0009264	deoxyribonucleotide catabolic process	2	1	AAEL012629,	50	49.52	98.92	0.0200919	0.0710605	1	1.69698
GO:0009204	deoxyribonucleoside triphosphate catabolic process	2	1	AAEL012629,	50	49.52	98.92	0.0200919	0.0710605	1	1.69698
GO:0009157	deoxyribonucleoside monophosphate biosynthetic process	2	1	AAEL012629,	50	49.52	98.92	0.0200919	0.0710605	1	1.69698
GO:0009162	deoxyribonucleoside monophosphate metabolic process	2	1	AAEL012629,	50	49.52	98.92	0.0200919	0.0710605	1	1.69698
GO:0009200	deoxyribonucleoside triphosphate metabolic process	2	1	AAEL012629,	50	49.52	98.92	0.0200919	0.0710605	1	1.69698
GO:0009177	pyrimidine deoxyribonucleoside monophosphate biosynthetic process	2	1	AAEL012629,	50	49.52	98.92	0.0200919	0.0710605	1	1.69698
GO:0043474	pigment metabolic process involved in pigmentation	2	1	AAEL000428,	50	49.52	98.92	0.0200919	0.0710605	1	1.69698
GO:0042441	eye pigment metabolic process	2	1	AAEL000428,	50	49.52	98.92	0.0200919	0.0710605	1	1.69698
GO:0019441	tryptophan catabolic process to kynurenine	2	1	AAEL000428,	50	49.52	98.92	0.0200919	0.0710605	1	1.69698
GO:0048069	eye pigmentation	2	1	AAEL000428,	50	49.52	98.92	0.0200919	0.0710605	1	1.69698
GO:0019918	peptidyl-arginine methylation, to symmetrical-dimethyl arginine	2	1	AAEL011877,	50	49.52	98.92	0.0200919	0.0710605	1	1.69698
GO:0007276	gamete generation	22	2	AAEL013027,AAEL017403,	9.1	9	9.96	0.0204596	0.0710605	1	1.6891
GO:0010951	negative regulation of endopeptidase activity	22	2	AAEL013027,AAEL017403,	9.1	9	9.96	0.0204596	0.0710605	1	1.6891
GO:0072527	pyrimidine-containing compound metabolic process	22	2	AAEL001246,AAEL012629,	9.1	9	9.96	0.0204596	0.0710605	1	1.6891
GO:0052548	regulation of endopeptidase activity	22	2	AAEL013027,AAEL017403,	9.1	9	9.96	0.0204596	0.0710605	1	1.6891
GO:0008150	biological process	6366	75	AAEL000010,AAEL000301,AAEL000428,AAEL000501,AAEL000517,AAEL000801,AAEL001246,AAEL001645,AAEL001759,AAEL002401,AAEL002483,AAEL002534,AAEL002832,AAEL003673,AAEL003689,AAEL004017,AAEL004500,AAEL004744,AAEL005567,AAEL005722,AAEL006115,AAEL006259,AAEL006642,AAEL006887,AAEL007441,AAEL007686,AAEL007844,AAEL008188,AAEL008451,AAEL008770,AAEL009042,AAEL009160,AAEL009464,AAEL009506,AAEL009524,AAEL010168,AAE…	1.2	1.17	1.51	0.0237437	0.0809125	1	1.62445
GO:0048609	multicellular organismal reproductive process	24	2	AAEL013027,AAEL017403,	8.3	8.25	9.06	0.0241282	0.0809125	1	1.61748
GO:0032504	multicellular organism reproduction	24	2	AAEL013027,AAEL017403,	8.3	8.25	9.06	0.0241282	0.0809125	1	1.61748
GO:0006414	translational elongation	24	2	AAEL004500,AAEL017096,	8.3	8.25	9.06	0.0241282	0.0809125	1	1.61748
GO:0010466	negative regulation of peptidase activity	26	2	AAEL013027,AAEL017403,	7.7	7.62	8.3	0.0280438	0.0886768	1	1.55216
GO:0045861	negative regulation of proteolysis	26	2	AAEL013027,AAEL017403,	7.7	7.62	8.3	0.0280438	0.0886768	1	1.55216
GO:0009133	nucleoside diphosphate biosynthetic process	3	1	AAEL001246,	33.3	33.01	49.45	0.0299873	0.0886768	1	1.52306
GO:0006586	indolalkylamine metabolic process	3	1	AAEL000428,	33.3	33.01	49.45	0.0299873	0.0886768	1	1.52306
GO:0006278	RNA-dependent DNA biosynthetic process	3	1	AAEL021140,	33.3	33.01	49.45	0.0299873	0.0886768	1	1.52306
GO:0048066	developmental pigmentation	3	1	AAEL000428,	33.3	33.01	49.45	0.0299873	0.0886768	1	1.52306
GO:0043473	pigmentation	3	1	AAEL000428,	33.3	33.01	49.45	0.0299873	0.0886768	1	1.52306
GO:0042402	cellular biogenic amine catabolic process	3	1	AAEL000428,	33.3	33.01	49.45	0.0299873	0.0886768	1	1.52306
GO:0035247	peptidyl-arginine omega-N-methylation	3	1	AAEL011877,	33.3	33.01	49.45	0.0299873	0.0886768	1	1.52306
GO:0070189	kynurenine metabolic process	3	1	AAEL000428,	33.3	33.01	49.45	0.0299873	0.0886768	1	1.52306
GO:0042436	indole-containing compound catabolic process	3	1	AAEL000428,	33.3	33.01	49.45	0.0299873	0.0886768	1	1.52306
GO:0046218	indolalkylamine catabolic process	3	1	AAEL000428,	33.3	33.01	49.45	0.0299873	0.0886768	1	1.52306
GO:0009310	amine catabolic process	3	1	AAEL000428,	33.3	33.01	49.45	0.0299873	0.0886768	1	1.52306
GO:0006569	tryptophan catabolic process	3	1	AAEL000428,	33.3	33.01	49.45	0.0299873	0.0886768	1	1.52306
GO:0006568	tryptophan metabolic process	3	1	AAEL000428,	33.3	33.01	49.45	0.0299873	0.0886768	1	1.52306
GO:0052547	regulation of peptidase activity	27	2	AAEL013027,AAEL017403,	7.4	7.34	7.97	0.0300908	0.0886768	1	1.52157
GO:0048468	cell development	29	2	AAEL013027,AAEL017403,	6.9	6.83	7.38	0.0343563	0.098997	1	1.46399
GO:0019953	sexual reproduction	29	2	AAEL013027,AAEL017403,	6.9	6.83	7.38	0.0343563	0.098997	1	1.46399
GO:0044703	multi-organism reproductive process	29	2	AAEL013027,AAEL017403,	6.9	6.83	7.38	0.0343563	0.098997	1	1.46399
GO:0042537	benzene-containing compound metabolic process	4	1	AAEL000428,	25	24.76	32.97	0.0397836	0.109758	1	1.4003
GO:0044550	secondary metabolite biosynthetic process	4	1	AAEL000428,	25	24.76	32.97	0.0397836	0.109758	1	1.4003
GO:0005984	disaccharide metabolic process	4	1	AAEL009524,	25	24.76	32.97	0.0397836	0.109758	1	1.4003
GO:0072529	pyrimidine-containing compound catabolic process	4	1	AAEL012629,	25	24.76	32.97	0.0397836	0.109758	1	1.4003
GO:0042430	indole-containing compound metabolic process	4	1	AAEL000428,	25	24.76	32.97	0.0397836	0.109758	1	1.4003
GO:0019748	secondary metabolic process	4	1	AAEL000428,	25	24.76	32.97	0.0397836	0.109758	1	1.4003
GO:0051346	negative regulation of hydrolase activity	32	2	AAEL013027,AAEL017403,	6.3	6.19	6.64	0.0411632	0.111975	1	1.38549
GO:0030162	regulation of proteolysis	32	2	AAEL013027,AAEL017403,	6.3	6.19	6.64	0.0411632	0.111975	1	1.38549
GO:0034622	cellular protein-containing complex assembly	192	5	AAEL005567,AAEL006115,AAEL006887,AAEL018018,AAEL020238,	2.6	2.58	2.7	0.0448792	0.121236	1	1.34795
GO:0044085	cellular component biogenesis	325	7	AAEL005567,AAEL005722,AAEL006115,AAEL006887,AAEL010821,AAEL018018,AAEL020238,	2.2	2.13	2.24	0.0462406	0.124052	1	1.33498
GO:0006446	regulation of translational initiation	5	1	AAEL006115,	20	19.81	24.72	0.0494819	0.126635	1	1.30555
GO:0000027	ribosomal large subunit assembly	5	1	AAEL006887,	20	19.81	24.72	0.0494819	0.126635	1	1.30555
GO:0018195	peptidyl-arginine modification	5	1	AAEL011877,	20	19.81	24.72	0.0494819	0.126635	1	1.30555
GO:0006672	ceramide metabolic process	5	1	AAEL001645,	20	19.81	24.72	0.0494819	0.126635	1	1.30555
GO:0046940	nucleoside monophosphate phosphorylation	5	1	AAEL001246,	20	19.81	24.72	0.0494819	0.126635	1	1.30555
GO:0035246	peptidyl-arginine N-methylation	5	1	AAEL011877,	20	19.81	24.72	0.0494819	0.126635	1	1.30555
GO:0018216	peptidyl-arginine methylation	5	1	AAEL011877,	20	19.81	24.72	0.0494819	0.126635	1	1.30555
