# Supplementary material for: A mosquito small RNA genomics resource reveals dynamic evolution and host responses to viruses and transposons
Source: HighWire-hosted journal article supplement (doi:10.1101/gr.265157.120), 2021-01-08
Supplement: SupplementalTableS8.xlsx [file SupplementalTableS8.xlsx]

## Sheet: TableS8_PIWI_piRNA_pathway
	Table S8. Conservation analysis of homologous genes in the piRNA and miRNA/siRNA pathways in Dipterans.
	piRNA pathway genes
	Human/mouse gene		D. melanogaster gene	Dmel gene location (Dm6 build)		AnGam gene name	AnGamgene ID (PEST4 build)	AnGam scaffold		AeAeg gene name	AeAeg gene ID (AeAegL5 build)	AeAegL5.0 scaffold	Blast scores		AeAlbo gene name	AeAlbo gene ID	C636 coord / Foshan coord			CuQuin gene name	CuQuin gene ID	coord	stats
	PIIWIL4	PIWIL4	ago3	chr3L:23555925-23689640		AnGam-Ago3	AGAP008862; XM_319604; XP_319604	Chr3R:19875230-19881129		AeAeg-Ago3	AAEL007823; XM_001652895; XP_001652945	Chr2:272550242-272574313	AGO3: QueryCov=100, %Id=52%, E=0.0		AeAlbo-AGO3-a	AALF025916; LOC109433074; XM_029855382; XP_029711242	NW_017857476.1 (5624667..5655920) / JXUM01S000859: 190,084-206,814	AGO3: QueryCov=100, %Id=97%, E=0.0		Ago3	CPIJ005275; XM_001846978.1 ; XP_001847030.1	supercont3.94: 526,635-529,364; DS231906:526,635..529,364	82% 0.0 49.87%	just one!
															AeAlbo-AGO3-b	AALF025919; LOC109411297; XM_029855612; XP_029711472	NW_017856341.1 (4112300..4120449 / JXUM01S000859: 335,251-339,798	AGO3: QueryCov=100, %Id=97%, E=0.0
	PIWIL1	PIWIL1	piwi	chr2L:10982205-10987420		AnGam-Piwi	AGAP009509; XM_310187; XP_310187	Chr3R:34,973,060-34,977,102		AeAeg-Piwi4	AAEL007698, XM_001652781; XP_001652831	Chr2:470345031-470375870	PIWI: QueryCov=98, %Id=77%, E=0.0 AUB: QueryCov=99, %Id=51%, E=0.0		AeAlbo-PIWI4	AALF008582, LOC109404625; XM_019677535; XP_019533080	NW_017857916.1 (1824850..1835827) /JXUM01S001894:109869:112958	QueryCov=99, %Id=98%, E=0.0		piwi-4	CPIJ002459; XM_001844016.1; XP_001844068.1	supercont3.32: 1,100,222-1,107,510; DS231844:1,100,222..1,107,510	85% 0.0 96.34%
	PIWIL2	PIWIL2	aub	chr2L:10997819-11001476		AnGam-Aub	AGAP011204; XM_564296; XP_564296	Chr3L:19311459-19315980		AeAeg-Piwi2	AAEL008098; XM_001653032; XP_001653082	Chr1:62489534-62494276	PIWI: QueryCov=98, %Id=72%, E=0.0 AUB: QueryCov=93, %Id=53%, E=0.0		AeAlbo-PIWI2	AALF006708; LOC109401826; XM_029853803; XP_029709663; XP_029709661	NW_017857751.1 (551537..560989) / JXUM01S012644: 2,590-8,328	PIWI2: QueryCov=100, %Id=97%, E=0.0 PIWI3: QueryCov=100, %Id=90%, E=0.0		piwi-2	CPIJ002415; XM_001843972.1; XP_001844024.1	supercont3.32:436568-439282; DS231844:436,568..439,282	100% 0.0 80.70%
										AeAeg-Piwi3	AAEL013692; XM_001663820; XP_001663870	Chr1:62468527-62479655	PIWI: QueryCov=98, %Id=72%, E=0.0 AUB: QueryCov=93, %Id=52%, E=0.0		AeAlbo-PIWI3-a	AALF005499; LOC109401827; XM_019674440; XP_019529985	NW_021838699.1 (1,045,894..1,049,414) / JXUM01S011559:12834:15945	PIWI3: QueryCov=95, %Id=88%, E=0.0		piwi-3	CPIJ002458; XM_001844015.1; XP_001844067.1	supercont3.32:1090324-1094516; DS231844:1,090,324..1,094,516	89% 0.0 81.06%
										AeAeg-Piwi5	AAEL013233; XM_021851614; XP_021707306	Chr3:279943226-279965201	PIWI: QueryCov=98, %Id=72%, E=0.0 AUB: QueryCov=95, %Id=56%, E=0.0		AeAlbo-PIWI3-b/5	AALF005498; LOC109413120; XM_029857212; XP_029713072	NW_021838909.1 (17,827,711..17,846,789) / JXUM01S011559:8550-16085	An alternative Piwi domain maybe spliced onto original set of MID & PAZ of upstream AALF005499		piwi-5	CPIJ017382; XM_001867912.1; XP_001867947.1	supercont3.997:121902-125150; DS232809:121,902..125,150	88% 0.0 69.18%
										AeAeg-Piwi7	AAEL006287; XM_001657576; XP_001657626	Chr1:121679216-121682727	PIWI: QueryCov=97, %Id=51%, E=0.0 AUB: QueryCov=93, %Id=57%, E=0.0		AeAlbo-PIWI7-a	AALF007445; LOC109422824; XM_019697718; XP_019553263	NW_021837156.1 (18,746,297..18,749,297) / JXUM01S001695: 234,135-237,131	QueryCov=100, %Id=84%, E=0.0		piwi-7	CPIJ017382; XM_001867912.1; XP_001867947.1	supercont3.997:121902-125150; DS232809:121,902..125,150	83% 0.0 71.78%
										AeAeg-Piwi6	AAEL013227; XM_001663359; XP_001663409	Chr3:279908444-279964670	PIWI: QueryCov=100, %Id=51%, E=0.0 AUB: QueryCov=92, %Id=56%, E=0.0		AeAlbo-PIWI7-b	AALF015479; LOC115260637; XM_029861706; XP_029717566	NW_021837156.1 (25,703,505..25,706,791) / JXUM01S000388:101135:104123	QueryCov=100, %Id=84%, E=0.0	locus not in Canu assembly	piwi-6	CPIJ017381; XM_001867911.1; XP_001867946.1	supercont3.997:114015-116924; DS232809:114,015..116,924	100% 0.0 64.87%
										Obsolete Entry AeAeg-Piwi5	XM_001663358, XM001663359.3; XP021707308.1, XP_001663408				AeAlbo-PIWI-6	AALF016369; LOC109418558; XM_029857214; XP_029713074	NW_021838909.1 (17,828,197..17,871,472 / JXUM01S003751:25700:35523	QueryCov=100, %Id=94%, E=0.0		piwi-5,-7(aub)	CPIJ017382; XM_001867912.1; XP_001867947.1	supercont3.997:121902-125150; DS232809:121,902..125,150	92% 0.0 56.25%
										Obsolete Entry AeAeg-Piwi3	AAEL008076-PA, XM_001653033, XP_001653083				Obsolete Entry Ago3-1	XM_019709465, XM_019709466, XP_019540374, XP_019540376, XP_019565010, XP_019565011
															Obsolete Entry PIWI4	AALF006337, XP_019533080, XP_019540823, XP_019541279
	Gtsf1	GTSF1	dmGtsf-1 (arx)	chr 3L:18,900,595 - 18,901,554		gtsf1	AGAP012911; XM_561090.4; XP_561090	Unplaced: 694 - 1,294		gtsf1-A	AAEL013843; XM_021839050.1; XP_021694742.1 (or XM_021839051.1; XP_021694743.1 )	chr 1: 18129637..18131373	Query cover: 94%, Evalue: 5e-36, Per. Identity:42.68%		gtsf1-A	AALF007508; XM_019699945.2 ; XP_019555490.2 and XM_019699946.2 ; XP_019555491.2	NW_017857133.1 (195755..197541)/ JXUM01S001709: 216,607-218,397	Query value: 100% E: 6e-169 PerID:81.09%		gtsf1 (second blast from B)	CPIJ007884; XM_001849466.1; XP_001849518.1	supercont3.172: 158,426-163,224; DS231984:158,426..163,224	94% 4e-42 38.46%
										gtsf1-B	AAEL008843; XM_001653417.2; XP_001653467	chr 2: 241343619..241365806	Query cover: 95%, Evalue: 8e-32, Per. Identity:40.52%		gtsf1-B	AALF023639; LOC109427843; XM_029867296.1; XP_029723156.1	NW_017857272.1 (4084173..4085237)/JXUM01S005941: 20,583-21,482	Query: 99% E: 2e-126 PerID: 94.32%		gtsf1-B	CPIJ007944; XM_001849694.1; XP_001849746.1	supercont3.181:649776-650790; DS231993:649,776..650,790	95% 4e-74 61.99%
										Obsolete Entries for AeAeg Gtsf1	AAEL009728; EAT38369.1, AAEL011859; EAT36014, XP_001653321; XM_001653271.2 (AAEL008580?)
	Maelstrom	MAEL	maelstrom	chr 3L:22,721,203 - 22,726,234		mael	AGAP002022; XP_321033; XM_321033.5	chr 2R: 14,023,340 - 14,025,334		mael-A	AAEL018151; XM_021848493.1; XP_021704185.1	chr 3: 31,482,551 - 31,503,487	Query cover: 72% E: 4e-123 Per.Ident: 48.38%		mael-A	AALF004898; LOC109418415; XM_019692600.2 ; XP_019548145.2	NW_017856924.1 (2716239..2728557)/ JXUM01S001413: 2,710-34,865	Query: 100% E: 0.0 PerID: 90.58%		mael-A	CPIJ001997; XM_001843484.1; XP_001843536.1	supercont3.24:338409-340553; DS231836:338,409..340,553	100% 0.0 65.73%
										mael-B	AAEL008595; XP_001653340; XM_00165329; XP_001653339; XM_001653289	chr 2:362861518:362868616:-1	Query cover: 73% E: 2e-99 Per.Ident: 41%		mael-B	AALF019672; LOC109417593; XM_019691653.2; XP_019547198.2	NW_017856076.1 (134893..137734)/ JXUM01S004651: 107,526-111,556	Query: 100% E: 0.0 PerID: 88.40%	not a gsf	mael-B	CPIJ001566; XM_001842998.1; XP_001843050.1	supercont3.17:618491-620029; DS231829:618,491..620,029	95% 2e-133 44.27%
										Obsolete Entries for AeAeg Mael	AAEL001004; AAEL001006;
	Tdrd5	TDRD5	tejas	chr 2R:14,300,103 - 14,302,353		tejas-A	AGAP007964; XM_001237936.1; XP_001237937.1	chr 3R: 3,379,307 - 3,381,818		tejas-A	AAEL008112; XM_001653061.2; XP_001653111.1	chr 3: 14952323 - 14957628	(from paper https://www.biorxiv.org/content/biorxiv/early/2018/01/04/242305.full.pdf)		tejas-A	AALF021745; KXJ71021	JXUM01S005305: 68,608-70,866	97% 0.0 82.47%		tejas	CPIJ011579; XM_001862171.1; XP_001862206.1	DS232173:314,125..315,870	100% 8e-159 47.57%
						tejas-B	AGAP013527; XM_003435709; XP_003435757	2R: 635,030-636,690		tejas-B	AAEL022773; XP_021700283; XM_021844591	2:241282032:241303047:-1			tejas-B	AALF023641; LOC109427899; XM_019703507.2 → XP_019559052.2 and XM_029872540.1 → XP_029728400.1	NW_017857272.1 (4097458..4116299)/ JXUM01S005941: 47,447-65,186	93% 7e-163 74.38%
										Obsolete Entry for AeAeg tejas	AAEL008834
	Tdrd12	TDRD12	boYb	chr 3L: 22,901,912..22,905,470		boYb	AGAP004351; XM_001688404; XP_001688456	chr 2R: 54,943,068 - 54,945,720		boYb	AAEL010402; XM_001654496; XP_001654546	1:268456907:268467003:1	4 isoforms, just recording AAEL010402		boYb	AALF013981; LOC109416367; XM_029874298.1 ; XP_029730158.1	NW_017856586.1 (992754..1004020)/ JXUM01S003100: 178,186-187,867	Query: 97% E: 0.0 ID: 85.17%		boYb	CPIJ005776; XM_001847208.1; XP_001847260.1	supercont3.100: 448,925-468,792; DS231912:448,925..468,792	76% 0.0 76.12%
			soyb	chr 2L:9,996,706 - 10,002,736		soYb	AGAP011520; No RefSeq entries because they are incomplete	3L:26425588:26434954:-1		soYb	AAEL001939; XM_021849973; XP_021705665; XM_001654267; XP_001654317	3: 227,038,316-227,082,917			soYb	AALF003796; LOC109415901; XM_029868547.1 ; XP_029724407.1 and XM_029868548.1; XP_029724408.1	NW_017856558.1 (1871496..1912223)/ JXUM01S001302: 226,325-246,615	Query: 100% E: 0.0 ID: 88.23%		soYb	CPIJ005048; XM_001846837.1 ; XP_001846889.1	supercont3.89: 870,048-884,545 ; DS231901:870,048..884,545	99% 0.0 55.29%
	Prmt5	PRMT5	capsuleen	chr 2R: 16,264,421 - 16,267,190		capsuleen	AGAP009048; XP_319800.4; XM_319800.4	chr 3R: 24,682,559 - 24,684,826		capsuleen	AAEL021474; LOC5569383 ;XM_001658412.2; XP_001658462	chr 2: 343940291 - 343942927	Query cover: 100% E: 0.0 PerID:67.51%		capsuleen	AALF002711; LOC109410215; XM_019683738.2 ; XP_019539283.2	NW_017856312.1 (2097217..2099576)/ JXUM01S001214: 24,239-26,556	Query value: 99% E: 0.0 ID: 91.00%		capsuleen	CPIJ001916; XM_001843641.1; XP_001843693.1	supercont3.26: 1,471,163-1,477,178; DS231838:1,471,163..1,477,178	98% 0.0 80.84%
	Setdb1	SETDB1	eggless (setDB1)	chr 2R:24,775,534 - 24,779,901		eggless	AGAP007978; XP_317488; XM_317488.4	chr 3R: 3,629,214 - 3,633,569		eggless	AAEL004274; XM_021845384.1 ; XP_021701076.1	chr 2: 293180901 - 293197582			eggless	AALF015398; AALF001369; LOC109429413; XM_029868939.1 ; XP_029724799.1	NW_017857311.1 (2882566..2908805)/ JXUM01S000397: 213,317-235,055 ; JXUM01S000004: 694,963-710,931;	Query value: 66% E: 0.0 ID: 69.43%		eggless	CPIJ016652; XM_001866682.1; XP_001866717.1	supercont3.780:51049-57800; DS232592:51,049..57,800	91% 0.0 45.96%
	Gasz	ASZ1	gasz (asz1)	chr 2R:8,167,948 - 8,170,089		gasz (asz1)	AGAP010482; XM_311462.4; XP_311462 (AgamP3)	chr 3L: 4,264,686 - 4,266,600		gasz (asz1)	AAEL000289; XM_021855660.1; XP_021711352.1	chr 3: 265284765..265317467	Query cover: 99% E: 1e-112 Per. Ident: 42.34%		gasz (asz1)	AALF017640; LOC109422364; XM_029873719.1 ; XP_029729579.1 and XM_029873718.1 ; XP_029729578.1	NW_017857060.1 (7990921..7992768)/ JXUM01S000477: 7,810-9,330	Query value: 100% E: 0.0 ID: 85.28%		gasz (asz1)	CPIJ015064; XM_001865193.1; XP_001865228.1	supercont3.600:234471-236145;	93% 3e-111 41.03%
	Hen1	HENMT1	hen1	chr 2R:12,145,710 - 12,152,752		hen1	AGAP005646; XM_315664.4; XP_315664 (AgamP3)	Chr 2L: 18,220,001 - 18,230,408		hen1	AAEL010029-PA; XM_021841938.1; XP_021697630	chr 2: 110,809,862 - 110,881,791	Query cover: 80% E: 7e-68 Per. Ident: 38.75%		hen1	? ; LOC109407983; XM_019681191.2 ; XP_019536736.2	NW_017856228.1 (5239258..5284050)/	Query: 100% E: 0.0 ID:86.34%		hen1	CPIJ004597; XM_001846309.1; XP_001846361.1	supercont3.74:990470-992534; DS231886:990,470..992,534	80% 9e-99 41.59%
	Hsp83		hsp83	chr 3L:3,192,969 - 3,197,059		hsp83-A	AGAP006958; XM_308800; XP_308800	Chr 2L: 40,255,992 - 40,258,586		hsp83-A	AAEL014843; XM_001649702.2; XP_001649752	chr 2: 104,793,312 - 104,795,889	Query cover: 100% E: 0.0 Per. Ident: 92.51%		hsp83	AALF025714; LOC109411870; XM_019685524.2 ; XP_019541069.1	NW_017856004.1 (1765692..1770175)/ JXUM01S006698: 10,901-13,321	Query: 100% E: 0.0 ID: 99.58%		hsp83-A (see below)	CPIJ015075; XM_001865449.1; XP_001865484.1	supercont3.628:1782-4885; DS232440:1,782..4,885	100% 0.0 92.22%
	-		krimper	chr 2R:16,238,103 - 16,240,722		krimper	AGAP002475; XM_312463.4; XP_312463	chr 2R: 21,854,690 - 21,857,098		krimper	AAEL023919; XM_021854154.1 → XP_021709846.1 ; XM_021854151.1 → XP_021709843.1; XM_021854144.1 → XP_021709836.1	chr 1 : 177440036 - 177472553	Query cover: 97% E: 4e-98 PerIdent: 35.74%		krimper	AALF019657; LOC109423491; XM_019698458.2 ; XP_019554003.2	NW_017857086.1 (1166797..1177662)/ JXUM01S004654: 70,473-81,917	Query: 99% E: 0.0 PerID: 75.00%		krimper	CPIJ001720; XM_001843208.1; XP_001843260.1	supercont3.19:1506638-1508552; DS231831:1,506,638..1,508,552	80% 3e-95 38.14%
	Mov10l1	MOV10L1	armi	chr3L:3461317-3466303		armi	AGAP006939; XM_308817; XP_308817	2L: 40,169,708-40,175,624		armi	AAEL019460; XM_021843229; XP_021698921	2:176218455:176233219	QueryCov=97%, %Id=41%, E=0.0		AeAlbo-Armi	AALF004386; LOC109399472; XM_029858226; XP_029714086	NW_021838947.1 (66,969..78,619) / JXUM01S010692:10862:14719	QueryCov=99, %Id=94%, E=0.0		armi	CPIJ001250; XM_001842867.1; XP_001842919.1	supercont3.15:284575-286871; DS231827:284,575..286,871	44% 4e-65 30.06%
										Obsolete Entry AeAeg-armi	AAEL010701, AAEL010693;				Obsolete Entry Armi	XP_019527459 to XP_019527461, then XP_019525878 to XP_019525883				armi	CPIJ001252; XM_001842869.1; XP_001842921.1	supercont3.15:296501-298584; DS231827:296,501..298,584	56% 3e-61 26.72%
	Tdrd2 (Tdrdh)	TDRKH	papi	chr 2L:2,220,748 - 2,225,544		papi	AGAP010171; XP_319344; XM_319344.4	chr 3R: 49,892,067 - 49,894,203		papi	AAEL013072; XM_001663230.2 → XP_001663280.1 ; XM_021844806.1 → XP_021700498.1	chr 2: 253358688 - 253366655	Query cover: 93% E: 0.0 Per.Ident: 53.69%		papi	AALF008727; LOC109420085; XM_019694394.2; XP_019549939.2	NW_017856988.1 (2967725..2985617); JXUM01S000212: 531,236-556,966	Query: 100%. E:0.0 ID:86.36%		papi	CPIJ013231; XM_001863265.1; XP_001863300.1	supercont3.436:279531-281475; DS232248:279,531..281,475	87% 0.0 54.04%
	Rnf17	RNF17	qin	chr 3R:18,591,027 - 18,650,137		qin	AGAP012340; XP_551849 ; XM_551849.2	Chr 3L: 40,754,540 - 40,759,579		qin	AAEL014694; XM_021846319.1; XP_021702011.1 and XM_021846326.1; XP_021702018.1	Chr1: 119,383,994-119,435,257	Query: 99% E: 0.0 PerID:30.99%		qin	AALF016817; LOC109432366; XM_029859933.1; XP_029715793.1 and XM_029859934.1; XP_029715794.1	NW_017857427.1 (2253899..2298927)/ JXUM01S003880: 6,173-34,837	Query: 100% E: 0.0 ID: 85.53%		qin	CPIJ012664; XM_001862928.1; XP_001862963.1	supercont3.409:209855-220531; DS232221:209,855..220,531	98% 9e-168 29.80%
	Fkbp6	FKBP6	shutdown	chr 2R:23,841,461 - 23,843,286		shutdown	AGAP011458; XM_001237980.2; XP_001237981	chr 3L: 24,936,640 - 24,938,215		shutdown	AAEL011632; XM_001661758.2; XP_001661808.2	chr 3: 281556028 - 281557686	Query cover: 96% E: 6e-153 Per.Ident: 50.47%		shutdown	AALF005069; LOC109418502; XM_019692703.2 ; XP_019548248.2	NW_017856926.1 (1462244..1463870)/ JXUM01S011197: 1,040-2,615	Query:100% E: 0.0 ID:95.02%		shutdown	CPIJ006210; XM_001847893.1; XP_001847945.1	supercont3.118:648571-650083; DS231930:648,571..650,083	96% 6e-156 50.24%
	Tdrd9	TDRD9	spn-E	chr 3R:15,837,419 - 15,844,415		spn-E	AGAP002829; XM_312084.5; XP_312084.5	chr 2R: 28,068,939 - 28,074,719		spn-E	AAEL023716; XP_001663402.2; XM_001663352.2	chr 3: 280,066,959 - 280,140,084	Query cover: 99% E: 0.0 Per.Ident: 52.92%		spn-E	AALF006846; LOC109418548; XM_019692757.2; XP_019548302.2	NW_017856927.1 (914556..939217)/JXUM01S000174: 63,147-82,732	Query: 100% E: 0.0 ID:96.58%		spn-E	CPIJ017541; XM_001867611.1; XP_001867646.1	supercont3.940:44603-49102; DS232752:44,603..49,102	95% 0.0 53.22%
										Obsolete Entry for AeAeg Spn-E	AAEL013235 (NCBI)
	Tdrd6	TDRD6	tudor	chr 2R:21,183,322 - 21,192,913		tudor	AGAP008268; XM_001688958.2; XP_001689010	chr 3R: 8,100,686 - 8,107,263		tudor	AAEL021145; XM_021848178.1 ; XP_021703870.1; AAEL008101	chr 2: 460887594..460960445	none		tudor	AALF017228; AALF015624; LOC109398549; XM_029864258.1; XP_029720118.1	NW_017857607.1 (92288..119727); JXUM01S004001: 99,807-128,888 ; JXUM01S000407: 292,501-321,307	100% 0.0 87.46%		tudor	CPIJ005824; XM_001847793.1; XP_001847845.1	supercont3.115:387554-393276; DS231927:387,554..393,276	100% 0.0 45.60%
	Uap56	DDX39B	uap56	chr 2L:5,539,326 - 5,542,314		uap56 (Hel25E)-1	AGAP009075; XM_319825.5; XP_319825.4	chr 3R: 25435722 - 25439843		uap56	AAEL001216; XM_001658256.2; XP_001658306.1	chr 2: 413303061 - 413308388	Query cover: 100% E: 0.0 Per.Iden: 97.18%		uap56	AALF001636; LOC109421659; XM_019696184.2 ; XP_019551729.1	NW_017857047.1 (4399547..4403547) JXUM01S008909: 27,860-31,118 f	100% 0.0 99.29%		uap56 (Hel25E)-1	CPIJ014241; XM_001864285.1; XP_001864320.1	supercont3.510:303550-306114; DS232322:303,550..306,114	100% 0.0 96.87%
	Mep50	WDR77	valois	chr 2L:20,064,261 - 20,065,679		valois	AGAP009782; XM_318877.4; XP_318877.4	chr 3R: 43264198 - 43265563		valois	AAEL007554; XM_001658382.1; XP_001658432.1	chr 2: 326973021 - 326976089	none (searched from vectorbase to NCBI)		valois	AALF004254; LOC109407249; XM_019680256.2; XP_019535801.2	NW_017856205.1 (8685131..8686799)/ JXUM01S001351: 9,919-11,672	100% 0.0 85.95%		valois	CPIJ010038; XM_001851345.1 ;XP_001851397.1	supercont3.246:518666-519987; DS232058:518,666..519,987	97% 1e-117 46.36%
	Mvh/Ddx4	DDX4	vasa	chr 2L:15,061,656 - 15,074,311		vasa (second BLASTp hit)	AGAP012523; XM_306246.4; XP_306246.4	unknown		vasa	AAEL001317; XM_001652960.2; XP_001653010.1	chr 3: 327108754 - 327119289	Query value: 100% E: 0.0 Per.Ident: 74.90%		vasa	AALF027794; AALF027261; LOC109428898; XM_029859691.1 ; XP_029715551.1	NW_017857305.1 (4065348..4084102)/ JXUM01S000954: 229,566-242,300 ; JXUM01S000923: 93,782-105,221	100% 0.0 92.92%	had AALF007978 before	vasa	CPIJ019196; XM_001869403.1; XP_001869438.1	supercont3.1491:55257-59824; DS233303:55,257..59,824	55% 0.0 77.06%
	Tdrd1	TDRD1	vreteno	chr 3R:22,742,954 - 22,745,581		vreteno	AGAP010722; XM_311436.4; XP_311436	chr 3L: 8,985,211 - 8,987,587		vreteno	AAEL020359; XM_021839388.1; XP_021695080.1 and XM_021839389.1 ; XP_021695081.1	chr 1: 35449526 - 35510516			vreteno (three kinds)	? ; LOC109415176; XM_019689054.2 ; XP_019544599.2	NW_017856504.1 (67400..78863)/	100% 0.0 86.71%		vreteno	CPIJ014023; XM_001864004.1; XP_001864039.1	supercont3.493:126855-129203; DS232305:126,855..129,203	99% 8e-131 38.81%
	MitoPLD	PLD6	zucchini	chr 2L:11,988,735 - 11,989,882		zuc	AGAP006233; XM_316301.4; XP_316301	chr 2L: 28,565,893 - 28,567,070		zuc	AAEL011385; XM_021853121.1; XP_021708813.1	chr 1 : 1363446 - 1386713			zuc	AALF028574; LOC109397933; XM_029853750.1 ; XP_029709610.1	NW_017857553.1 (20553..169429)/JXUM01S001010: 193,137-202,732	99% 0.0 80.37%		zuc	CPIJ009798; XM_001870711.1; XP_001870746.1	supercont3.266:228344-236133; DS232078:228,344..236,133	88% 6e-50 34.71%
	-		veneno (CG9684)	3R:8,359,958..8,362,554		veneno	No clear ortholog			veneno	AAEL012437; XM_001662534.2; XP_001662584.2; XM_001662535.2 ; XP_001662585.2 ; XM_021857478.1 ; XP_021713170.1	chr 1: 212918648 - 212993075	no BLAST from paper: https://academic.oup.com/nar/article/47/5/2546/5253060		veneno	AALF015078; LOC109425508; XM_029860077.1 ; XP_029715937.1	NW_017857214.1 (657561..722181)/ JXUM01S003387: 70,883-119,603	100% 0.0 71.38%	4X isoforms	veneno	CPIJ001661; XM_001843149.1; XP_001843201.1	supercont3.19:463866-473910; DS231831:463,866..473,910	86% 4e-102 44.67%
												-
			fs(1)yb	chr X:2,720,468 - 2,724,158		No clear homolog				No clear homolog					boyb second blast hit	AALF013981; LOC109430043; XM_029874309.1; XP_029730169.1	NW_017857324.1 (2039720..2050232)	Query: 97% E: 0.0 ID: 84.32%		piwi blast hit	CPIJ012516; XM_001862456.1 ; XP_001862491.1	supercont3.379:407633-410432; DS232191:407,633..410,432	82% 2e-130 33.50%
	-		panx	chr 2R:21,310,368 - 21,312,354		No clear homolog					-	-			soYb second blast hit	AALF003796; LOC109412633; XM_029868592.1; XP_029724452.1	NW_017856391.1 (1488304..1504545)/ JXUM01S001302: 226,325-246,615	Query: 100% E: 0.0 ID: 88.27%
	-		rhino	chr 2R:17,628,491 - 17,633,516		No clear homolog				-	-	-								gtsf1 second blast hit	CPIJ014036; XM_001864099.1; XP_001864134.1	supercont3.500:84951-86260; DS232312:84,951..86,260	93% 4e-39 43.59%
	-		deadlock	chr 2L:21,145,137 - 21,148,546		No clear homolog				-	-	-			vreteno second blast hit	LOC109428489; XM_029855861.1 → XP_029711721.1 and XM_019704268.2 → XP_019559813.2	NW_017857283.1 (7472294..7558225)	100% 0.0 85.98%		gtsf1 third blast hit	CPIJ015245; XM_001865480.1; XP_001865515.1	supercont3.631:34403-35339; DS232443:34,403..35,339	93% 9e-35 37.06%
	-		cutoff	chr 2R:11,886,067 - 11,887,603		No clear homolog				-	-	-			vreteno third blast hit	LOC115253714; XM_029855855.1 → XP_029711715.1 and XM_029855854.1 → XP_029711714.1	NW_021838798.1 (62456935..62533662)	100% 0.0 86.32%	locus not in Canu assembly	gtsf1 fourth blast hit	CPIJ015244; XM_001865479.1; XP_001865514.1	supercont3.631:27788-28543; DS232443:27,788..28,543	93% 7e-34 37.06%
	-		oskar	chr 3R:8,935,126 - 8,938,395		No clear homolog				-	-	-
	-		squash	chr 2L:16,680,054 - 16,681,653		No clear homolog				-	-	-			valois second blast hit	LOC109414319; XM_029858708.1 → XP_029714568.1	NW_017856468.1 (873602..875330, complement)	100% 0.0 85.67%		hen1	CPIJ016924; XM_001867045.1; XP_001867080.1	supercont3.836:79129-81492; DS232648:79,129..81,492	80% 8e-97 41.59%
	-		CG13741/Bootlegger	chr 2R: 9,092,506 - 9,094,658		No clear homolog				-	-	-			valois third blast hit	LOC115258726; XM_029859088.1 → XP_029714948.1	NW_021839020.1 (49525246..49526841, complement)	100% 0.0 85.40%	locus not in Canu assembly
			Minotaur	chr 3R 27,925,191 - 27,933,077		Minotaur	AGAP003687; XM_313470.5; XP_313470.4;	Chr 2L: 42,017,361 - 42,028,560		Minotaur	LOC5568724; XM_021856381.1, XP_021712073.1; XM_021856379.1 ,XP_021712071.1 ; XM_021856380.1 , XP_021712072.1; XM_001658057.2 , XP_001658107.2 ; XM_021856382.1 , XP_021712074.1				Minotaur	LOC109402364; XM_019675031.2 → XP_019530576.2; XM_019675030.2 → XP_019530575.2 ; XM_019675032.2 → XP_019530577.2	NW_017857775.1 (326944..448209)	100% 0.0 90.34%
			Nxf3	chr 3L: 13,965,203 - 13,973,067		No clear homolog				No clear homolog
			Nxt1	chr 2R: 23,811,321 - 23,811,974		Nxt1	AGAP008234; XM_317236.4; XP_317236	3R: 7544754 - 7545471		NTF2-related export protein	AAEL001706; XM_001653772.2; XP_001653822.1	chr 2: 441771060 - 441771789	Query value: 98% E: 08e-84 Per.Ident:78.990%
			Crm1 (emb)	chr 2L: 8,403,573 - 8,408,853		Crm1	AGAP009929; XM_319051; XP_319051	3R: 45417820 - 45421670		NTF2-related export protein	LOC110675118; XM_021839494.1 ; XP_021695186.1	chr 1: 99431930 - 99432326	Query value: 85% E: 2e-59 Per.Ident:68.07%
			Daedalus (Daed)	chr 2L: 2,214,972 - 2,216,311		No clear homolog				NTF2-related export protein	LOC5563979; XM_021838653.1; XP_021694345.1	chr 1 : 30461074 - 30461821	Query value: 79% E: 4e-55 Per.Ident:70%							hsp83	CPIJ011246; XM_001861893.1; XP_001861928.1	supercont3.343:338255-340405; DS232155:338,255..340,405	100% 0.0 91.81%
			Moon	chr X: 12,072,008 - 12,072,818		No clear homolog				NTF2-related export protein	AAEL004037; XM_021852526.1; XP_021708218.1	chr 3: 166188723 - 166189537	Query value: 79% E: 2e-52 Per.Ident:67%							hsp83	CPIJ011244; XM_001861891.1 ;XP_001861926.1	supercont3.343:325148-327298; DS232155:325,148..327,298	100% 0.0 91.67%
			CCR4 (twin)	chr 3R: 24,196,893 - 24,221,965		CCR4 (twin)	AGAP004405; XM_313691.2; XP_313691	2R: 55723961 - 55811152		Crm1	AAEL001484; XM_021844937.1 , XP_021700629.1; XM_001653342.2 , XP_001653392.1	chr 2: 262346112 - 262386625	Query value:1009% E: 0.0 Per.Ident:92%		Crm1	LOC109401363; XM_019673870.2 → XP_019529415.2; XM_019673871.2 → XP_019529416.2	NW_017857712.1 (1545567..1580938, complement)	100% 0.0 99.24%		Minotaur	CPIJ001670; XM_001843158.1 → XP_001843210.1	DS231831:697,099..705,686	100% 0.0 76.95%
			trf2	chr X: 8,409,272 - 8,433,011		No clear homolog				No clear homolog
			THOC5	chr 2R: 23,954,091 - 23,956,406		THOC5	AGAP004746; XM_001689042.1 ; XM_318072.4; XP_318072; XP_001689094.1	2L: 3030691 - 3033267		No clear homolog										NTF2-related export protein
			Sv210	chr 2R: 9,116,122 - 9,122,000		Sv210	AGAP005031; XM_001688417.2; XM_313897.5; XP_001688469.1; XP_313897.4	2L: 8613164 - 8620262		CCR4 (twin)	AAEL012925; AAEL013459; XM_021857329.1 , XP_021713021.1 ; XM_021857328.1 , XP_021713020.1	chr 1: 205930356 - 206348045	Query value: 100% E: 0 Per.Ident:60%		CCR4 (twin)	LOC109399943; XM_019672396.2 → XP_019527941.2	NW_017857665.1 (1744292..2239371)	100% 0.0 99.09%		NTF2-related export protein
			Wde	chr 2R: 10,800,420 - 10,808,938		No clear homolog				No clear homolog										NTF2-related export protein
			SUMO (smt3)	chr 2L: 6,966,780 - 6,967,644		SUMO (smt3)	AGAP000852; XM_316822.5 ; XP_316822.4	X: 15728709 - 15731359		THOC5	AAEL011637; XM_001661752.2 → XP_001661802.1	chr 3: 281604702 - 281607811	Query value: 100% E: 0 Per.Ident:92%		THOC5 first hit	LOC109413068; XM_019686737.2 → XP_019542282.2	NW_017856413.1 (884158..886608)	100% 0.0 95.77%		NTF2-related export protein
						SUMO (smt3)	AGAP001701; XM_321390.4 ; XP_321390.3	2R: 8800518 - 8801163		Sv210	LOC5579515; XM_021844458.1 , XP_021700150.1; XM_021844459.1 , XP_021700151.1	chr 2: 233065277..233119361	Query value: 96% E: 0 Per.Ident:68%		THOC5 second hit	LOC109418496; XM_019692699.2 → XP_019548244.2	NW_017856926.1 (1436597..1439034)	100% 0.0 95.77%		Crm1	CPIJ009366; XM_001850809.1 → XP_001850861.1	DS232036:380,308..390,970
										No clear homolog					(Sv210) SUMO ligase	LOC109414469; XM_029872307.1 → XP_029728167.1 ;XM_019688308.3 → XP_019543853.1; XM_029872308.1 → XP_029728168.1 ; XM_029872309.1 → XP_029728169.1 ;XM_029872310.1 → XP_029728170.1	NW_017856472.1 (2566923..2602984)	100% 0.0 97.66%
										SUMO (smt3)	AAEL015064; XM_001650395.2,XP_001650445.1	chr 1: 153238317 - 153271218	Query value: 93% E: 2e-61 Per.Ident:93%		SUMO (smt3)	LOC109424859; XM_019700055.1 → XP_019555600.1	NW_017857140.1 (36965..61749)	100% 2e-68 100%		CCR4 (twin)	CPIJ005352; XM_001846742.1 → XP_001846794.1	DS231898:653,915..658,918	70% 0.0 84.75%
			Genes only found in Drosophila melanogaster
						Weaker level of homology														THOC5 first hit	CPIJ018891; XM_001869046.1 → XP_001869081.1	DS233154:67,695..69,906	100% 0.0 83.09%
																				THOC5 second hit	CPIJ018891; XM_001869046.1 → XP_001869081.1	DS233154:67,695..69,906	100% 0.0 82.95%
																				(Sv210) SUMO ligase	CPIJ009163; XM_001850599.1 → XP_001850651.1	DS232027:120,365..124,398	74% 0.0 85.44%
			SFinX												obsolete entry (tejas)	XP_019551883.1 and XP_019553674.1 obsolete entry (NCBI)
			PICTS																	SUMO (smt3)	CPIJ011350; XM_001861533.1 → XP_001861568.1	DS232135:308..1,598	100% 8e-68 97.89%
			PPNP
															obsolete entry (zuc)	XP_019525819.1 and XP_019533977.1 obsolete entry (NCBI)
															obsolete entry (eggless)	LOC109429413; XM_029868939.1 ; XP_029724799.1 and XP_019555914.1 and XP_019560911.1(vectorbase)
															obsolete entry (hsp83)	LOC109407918; XM_029876496.1 ; XP_029732356.1 (vectorbase)
															obsolete entry (veneno)	XP_019525819.1 and XP_019533977.1 and XP_019546714.1 and XP_019546715.1 and XP_019546716.1 and XP_019556302.1(NCBI)
															obsolete entry (gtsf-B))	XP_019558970.1 and XP_019559459.1
															obsolete entry (boYb)	XP_019561613.1 and XP_019545950.1 and XP_019545952.1 and XP_019565104.1
															obsolete entry (soYb)	XP_019545397.1 and XP_019541803.1
															obsolete entry (capsuleen)	XP_019547146.1 and XP_019539283.1
															obsolete entry (gasz)	XP_019552653.1 and XP_019555138.1
															obsolete entry (qin)	XP_019553543.1 and XP_019564255.1
															obsolete entry (tejas-A)	XP_019551883.1 and XP_019553674.1
															obsolete entry (tudor)	XP_019526476.1 and XP_019561506.1
															obsolete entry (vasa)	XP_019544295.1 and XP_019560281.1
															obsolete entry (soYb second blast)	XP_019541803.1 and XP_019545397.1
															obsolete entry (mael third blast)	XP_019548102.1 and XP_019548145.1 and XP_019557122.1 and XP_019557123.1

## Sheet: TableS8_miRNAsiRNA_pathway
Table S8. Conservation analysis of homologous genes in the piRNA and miRNA/siRNA pathways in Dipterans.
miRNA/siRNA pathway genes homologs
Human/mouse gene		Drosophila melanogaster genes	Dmel gene location	Dmel protein ID		AnGam gene name	AnGamgene ID, protein ID	AnGam scaffold	Blast scores		AeAeg gene name	AeAeg gene ID, protein ID	AeAeg scaffold	Blast scores			AeAlbo gene name	AeAlbo gene ID	C636 coord / Foshan coord	Blast scores			CuQuin gene name	CuQuin gene ID	CpipJ2 coordinates	Blast scores
Ago1, Ago3, Ago4		AGO1	2R:13,943,387..13,958,089	NP_725341		AnGam_Ago4	AGAP011717, XM_320795; XP_320795	3L; NT_078267.5 (32108213..32126103)	Query: 100% E: 0.0 ID: 88.73%		AGO2	AAEL017251; XM_011494700.2 ; XP_011493002.2	3: NC_035109.1 (264135283..264190746)	Query: 97% E: 0.0 ID:56.99%			AGO2	AALF006056; LOC115269266; XM_029877819.1; XP_029733679.1	NW_021838541.1 (55919..62009)/ JXUM01S012040: 1,038-18,138	Query: 82% E: 0.0 ID: 91.10%			AGO2 (see below)	CPIJ009898; XM_001851400.1 ; XP_001851452.1	supercont3.250: 3,957-26,724	Query: 100% E: 0.0 PerId: 64.07%
Ago2		AGO2	3L:15,554,113..15,561,042	NP_648775		AnGam_Ago	AGAP011537; XM_559969.3; XP_559969	3L; NT_078267.5 (26912149..26931547)	Query: 64% E: 0.0 ID: 41.18%		AGO1a_b	AAEL012410, XP_021704818 to XP_021704836 isoforms	3:290287887-290466600		19 isoforms		AGO1a_b	AALF020776; LOC109425656; XM_029865565.1 ; XP_029721425.1	NW_017856122.1 (159697..273968)/ JXUM01S004985: 55,028-87,194	Query: 99% E: 0.0 ID: 99.11%	8 isoforms		AGO1a_b	CPIJ006138; XM_001847530.1; XP_001847582.1	supercont3.109: 81,183-93,586	Query: 83% E: 0.0 PerId: 97.14%
DGCR8		PASHA DGCR8 (pasha)	3R:31,617,977..31,622,217	NP_651879		AnGam_pasha	AGAP002554; XM_312385.5; XP_312385.5	2R; NT_078266.2 (22780368..22782949	Query: 91% E: 0.0 ID: 59.65%		pasha	LOC5574820; XM_021855231.1; XP_021710923.1	3: NC_035109.1 (113925112..113987935)	Query: 95% E: 0.0 ID: 71.54%	8 isoforms		pasha	AALF013537; LOC109399310; XM_029877080.1; XP_029732940.1	NW_017857654.1 (192487..237880)/ JXUM01S000329: 328,083-339,151	Query: 95% E: 0.0 ID: 92.51%			pasha	CPIJ017023; XM_001867286.1 ; XP_001867321.1	supercont3.875: 114,190-124,606	Query: 92% E: 0.0 PerId: 81%
drosha/RNC		Drosha	2R:7,932,429..7,936,840	NP_477436		AnGam_drosha	AGAP008087; XM_555381.3 ; XP_555381.3	3R; NT_078268.4 (5298415..5303042)	Query: 74% E: 0.0 ID:76.13%		drosha	AAEL008592; XM_001653288.2 ; XP_001653338.1	2: NC_035108.1 (362873735..362879641	Query: 88% E: 0.0 ID: 74.90%			drosha	AALF019674; LOC109417569; XM_019691643.2 ; XP_019547188.2	NW_017856076.1 (121398..126584)/ JXUM01S004651: 126,283-131,292	Query: 100% E: 0.0 ID: 89.34%			drosha	CPIJ001734; XM_001843547.1 ; XP_001843599.1	supercont3.25: 753,516-765,510	Query: 61% E: 0.0 Perid: 75.72%
DCR1		Dcr1	3R:22,734,007..22,741,091	NP_524453		AnGam_Dcr1	AGAP002836; XM_003436208.1; XP_003436256.1 and XM_312076.3; XP_312076.2	2R; NT_078266.2 (28193323..28200824)	Query: 93% E: 0.0 ID:53.00%		Dcr1	AAEL001612; XM_001659697.2; XP_001659747.2	1: NC_035107.1 (138739045..138795698)	Query: 99% E: 0.0 ID: 53.45%			Dcr1	AALF007043; LOC109427687; XM_029862069.1 ; XP_029717929.1 and XM_029862068.1; XP_029717928.1	NW_017857266.1 (1978974..2012440)/ JXUM01S001661: 15,924-53,003	Query: 100% E: 0.0 ID: 89.54%			Dcr1	CPIJ003169; XM_001844705.1; XP_001844757.1	supercont3.43: 585,263-594,991	Query: 100% E: 0.0 Perid: 83.84%
		Dcr2	2R:17,574,979..17,581,525	NP_523778		AnGam_Dcr2	AGAP012289, XM_320248.4 ; XP_320248.4	3L; NT_078267.5 (39800112..39805562)	Query: 95% E: 8e-159 ID:30.95%		Dcr2	AAEL006794; XM_001652162.2 ; XP_001652212.1	3: NC_035109.1 (368335903..368378350)	Query: 98% E: 0.0 ID: 52.02%			Dcr2	AALF027719; LOC109403945; NM_001352974.1; NP_001339903.1	NW_017856188.1 (2341804..2363262)/ JXUM01S000956: 158,671-186,960	Query: 100% E: 0.0 ID: 89.33%			Dcr2	CPIJ010534; XM_001855142.1; XP_001855187.1	supercont3.278: 288,265-296,919	Query: 99% E: 0.0 Perid: 69.38%
PRKRA/TRBP		loqs	2L:13,382,652..13,385,671	NP_723813		AnGam_Ioqs	AGAP009781; XM_318876.4 ; XP_318876.4	3R; NT_078268.4 (43257320..43259063)	Query: 72% E: 6e-103 ID: 52.44%		Ioqs	AAEL008687; XM_001659376.2 ; XP_001659426.1	2: NC_035108.1 (321417956..321443209)	Query: 99% E: 3e-177 ID: 75.58%			Ioqs	AALF018531; LOC109406841; XM_029859389.1; XP_029715249.1	NW_017856205.1 (2746851..2768739)	Query: 100% E: 0.0 ID: 83.02%			Ioqs	CPIJ004832; XM_001846390.1; XP_001846442.1	supercont3.76: 971,420-979,596	Query: 97% E: 0.0 Perid: 83.64%
MOV10		CG6967	2R:17,062,775..17,066,546	NP_611185		AnGam_CG6967	AGAP011893; XM_320633.4 ; XP_320633.4	3L; NT_078267.5 (34663626..34666364)	Query: 58% E: 2e-57 ID:32.37%		CG6967	AAEL009393; XM_021852925.1; XP_021708617.1	3: NC_035109.1 (380572619..380644921)	Query: 99% E: 4e-162 ID: 39.02%			CG6967	AALF023568; LOC109403367; XM_029875739.1; XP_029731599.1 and XM_029875738.1; XP_029731598.1	NW_017857830.1 (98014..134025)/ JXUM01S005923: 14,261-17,169	Query: 100% E: 0.0 ID: 89.59%			CG6967 (see below)	CPIJ012615; XM_001863124.1; XP_001863159.1	supercont3.427: 9,946-18,251	Query: 99% E: 0.0 Perid: 73.89%
XPO5		Ranbp21, exp5	X:19,646,306..19,652,269	NP_608339		AnGam_Ranbp21	AGAP011888; XM_320637.3 ; XP_320637.3	3L; NT_078267.5 (34634037..34638087)	Query: 98% E: 0.0 ID: 56.13%		Ranbp21	AAEL009392; XM_001659973.2 ; XP_001660023.2	3: NC_035109.1 (380800392..380834387)	Query: 100% E: 0.0 ID: 79.11%			Ranbp21/exp5	AALF006625; LOC109410612; XM_029875748.1; XP_029731608.1	NW_017856327.1 (142828..154360)/ JXUM01S001601: 214,717-235,100	Query: 100% E: 0.0 ID: 94.54%			Ranbp21/exp5	CPIJ010675; XM_001855811.1; XP_001855857.1	supercont3.280: 116,089-126,400	Query: 100% E: 0.0 Perid: 83.59%
Ran		Ran	X:11,144,852..11,148,716	NP_651969		AnGam_Ran	AGAP007699; XM_564524.3; XP_564524.3	2L; NT_078265.2 (49132118..49135038)	Query: 97% E: 3e-157 ID:96.67%	3 isoforms	Ran	AAEL009287; XM_001659845.2 ; XP_001659895.1	2: NC_035108.1 (18081576..18099187)	Query: 100% E: 3e-160 ID: 98.13%			Ran	AALF018447; LOC109409292; XM_029860817.1; XP_029716677.1	NW_017856043.1 (3788776..3801890)/ JXUM01S004330: 114,057-129,309	Query: 100% E: 6e-163 ID: 100.00%	3 isoforms		Ran	CPIJ008595; XM_001850285.1 ; XP_001850337.1	supercont3.202: 203,124-211,506	Query: 100% E: 2e-163 Perid: 100.00%
HEN1		hen1	2R:12,145,710..12,152,752	NP_610732		AnGam_Hen1	AGAP005646; XM_315664.4; XP_315664.4	2L; NT_078265.2 (18220868..18229541)	Query: 57% E: 3e-75 ID:50.22%		Hen1	AAEL010029; XM_021841939.1; XP_021697631.1	2: NC_035108.1 (110815772..110875973)	Query: 100% E: 2e-151 ID:46.47%			Hen1	LOC109407983; XM_019681191.2; XP_019536736.2	NW_017856228.1 (5239258..5284050)/	Query: 100% E: 0.0 ID: 86.34%		No alboID	Hen1 (see below)	CPIJ016924; XM_001867045.1 ; XP_001867080.1	supercont3.836: 79,129-81,492	Query: 85% E: 9e-160 Perid: 56.64%
GW182		gawky (gw)	4:649,041..663,103	NP_726596		AnGam_gawky-A	AGAP007808;XM_001689000.2; XP_001689052.1	3R; NT_078268.4 (1282180..1308138)	Query: 36% E: 5e-83 ID: 38.68%		gawky-A	AAEL007447; XM_021845363.1; XP_021701055.1	2: NC_035108.1 (291550701..291585468)	Query: 100% E: 0.0 ID: 51.21%			gawky-A	AALF016805; LOC109429432; XM_029868948.1; XP_029724808.1	NW_017857311.1 (4431283..4455901)/ JXUM01S003882: 17,017-23,936	Query: 100% E: 0.0 ID: 90.74%	3 isoforms		gawky-A (see below)	CPIJ011733; XM_001862055.1; XP_001862090.1	supercont3.352: 305,881-310,809	Query: 70% E: 0.0 Perid: 71.57%
						AnGam_gawky-B	AGAP007803; XM_001237965.3; XP_001237966.2	3R; NT_078268.4 (1248951..1253554)	Query: 47% E: 5e-83 ID: 34.52%		gawky-B	AAEL007449; XM_021845365.1; XP_021701057.1	2: NC_035108.1 (291594665..291649250)	Query: 99% E: 7e-106 ID: 50.00%	4 isoforms		gawky-B	AALF016807; LOC109425152; XM_019700388.2; XP_019555933.2	NW_017857179.1 (3707040..3738485)/ JXUM01S003882: 69,022-84,361	Query: 90% E: 0.0 ID: 42.53%	3 isoforms		gawky-B	CPIJ011735; XM_001862057.1; XP_001862092.1	supercont3.352: 341,929-348,951	Query: 91% E: 0.0 Perid: 66.48%
CNOT1		CCR4-NOT subunit 1 (not1, CNOT1)	2R:9,566,146..9,579,007	NP_001097242		AnGam_not1	AGAP009057; XM_319808.4 ; XP_319808.4	3R; NT_078268.4 (24938431..24949455	Query: 90% E: 0.0 ID: 56.42%		not1	AAEL013767; XM_021846157.1; XP_021701849.1	2: NC_035108.1 (344895136..344944276)	Query: 100% E: 0.0 ID: 77.78%			not1	AALF024292; LOC109410219; XM_029873429.1; XP_029729289.1 and XM_029873430.1; XP_029729290.1	NW_017856312.1 (3241371..3272279)/ JXUM01S000784: 24,588-58,155	Query: 100% E: 0.0 ID: 97.53%			not1	CPIJ007821; XM_001849433.1; XP_001849485.1	supercont3.171: 5,009-26,221	Query: 70% E: 0.0 Perid: 86.55%
CNOT3		CCR4-NOT subunit 3 (not3, CNOT3)	2R:5,656,406..5,663,222	NP_610176		AnGam_not3	AGAP009030; XM_319780.5 ; XP_319780.4	3R; NT_078268.4 (24345895..24351173)	Query: 56% E: 1e-140 ID: 81.65%		not3	AAEL012930; XM_021846937.1; XP_021702629.1	2: NC_035108.1 (386562128..386603625)	Query: 70% E: 4e-167 ID: 85.35%	5 isoforms		not3	AALF020548; LOC109427477; XM_019703045.2; XP_019558590.2	NW_017856142.1 (1946885..1964100)/ JXUM01S000581: 303,257-327,855	Query: 100% E: 0.0 ID: 96.51%	5 isoforms		not3	CPIJ010111; XM_001854603.1; XP_001854649.1	supercont3.276: 472,976-487,837	Query: 68% E: 0.0 Perid: 74.14%
CNO6L		CCR4-NOT subunit 6-like (twin, CCR4, CNO6L)	3R:24,196,893..24,221,965	NP_732965		AnGam_twin	AGAP004405; XM_313691.2 ; XP_313691.2	2R; NT_078266.2 (55723961..55811152)	Query: 98% E: 0.0 ID: 82.12%		twin	AAEL012925; XM_021857329.1; XP_021713021.1 and XM_021857328.1 ; XP_021713020.1	1: NC_035107.1 (205930356..206348045)	Query: 100% E: 0.0 ID: 92.52%			twin	AALF018294; LOC109399943; XM_019672396.2 ; XP_019527941.2	NW_017857665.1 (1744292..2239371)/ JXUM01S004293: 30,650-32,132	Query: 100% E: 0.0 ID: 99.09%			twin	CPIJ005352; XM_001846742.1; XP_001846794.1	supercont3.86: 653,915-658,918	Query: 70% E: 0.0 Perid: 84.75%
CNOT11		CCR4-NOT subunit 11 (not11, CNOT11)	2R:24,036,720..24,037,915	NP_726406		AnGam_not11	AGAP007117; XM_565083.3; XP_565083.3	2L; NT_078265.2 (43026304..43028115)	Query: 98% E: 4e-71 ID:46.56%		not11	AAEL009306; XM_001659878.2 ; XP_001659928.1	NW_018736158.1 (32294..33332)	Query: 51% E: 3e-100 ID:61.90%			not11	AALF001109; LOC109410076; XM_019683607.2; XP_019539152.1	NW_017856307.1 (400215..401196)/ JXUM01S008598: 40,436-41,464	Query: 100% E: 0.0 ID: 98.45%			not11	CPIJ004074; XM_001845652.1; XP_001845704.1	supercont3.60: 342,128-344,447	Query: 97% E: 2e-151 Perid: 82.28%
																	ago2	AALF020776; LOC109413546; XM_029865555.1 ; XP_029721415.1	NW_017856432.1 (131994..252812)/ JXUM01S004985: 55,028-87,194	Query: 79% E: 2e-129 ID:34.26%	5 isoforms		ago2	CPIJ014791; XM_001865078.1; XP_001865113.1	supercont3.588: 265,739-269,417	Query: 100% E: 0.0 PerId: 51.38%
						Weaker level of homology											Dcr1-like	AALF007043; LOC109431485; XM_029861986.1; XP_029717846.1	NW_017857390.1 (423655..440943)/	Query: 100% E: 0.0 ID: 88.45%			CG6967- like	CPIJ015649; XM_001865913.1; XP_001865948.1	supercont3.677: 209,778-217,692	Query: 91% E: 0.0 Perid: 73.89%
																	CG6967- like	AALF023568; LOC109414932; XM_019688782.3; XP_019544327.3	NW_017857114.1 (908417..911585)/ JXUM01S005923: 14,261-17,169	Query: 85% E: 0.0 ID: 45.75%			Hen1	CPIJ004597; XM_001846309.1; XP_001846361.1	supercont3.74: 990,470-992,534	Query: 79% E: 5e-164 Perid: 60.14%
																	Hen1- second blast hit	LOC115254252; XM_029879290.1; XP_029735150.1	NW_021838576.1 (41560622..41620820)/	Query: 94% E: 0.0 ID: 86.77%		No alboID	gawky-A- 2nd BLAST hit	CPIJ010645; XM_001854361.1; XP_001854407.1	supercont3.275: 156,361-161,663	Query: 71% E: 0.0 Perid: 46.96%
																	Duplicated entries?
																	obsolete in vectorbase (ago2)	XP_019542767.1 XP_019542768.1 XP_019542769.1 XP_019556453.1 XP_019556460.1 XP_019556471.1
																	obsolete in vectorbase (ago2)	XP_019552693.1 XP_019555173.1
																	obsolete in vectorbase (pasha)	XP_019527292.1 XP_019527293.1 XP_019527294.1 XP_019527295.1 XP_019565344.1 XP_019565345.1 XP_019565346.1 XP_019565348.1 XP_019565349.1 XP_019565350.1
																	obsolete in vectorbase (ago1 a_b)	XP_019542767.1 XP_019542768.1 XP_019542769.1 XP_019556453.1 XP_019556460.1 XP_019556471.1
																	obsolete in vectorbase (Dcr1)	XP_019558822.1 XP_019563241.1 XP_019563242.1
																	obsolete in vectorbase (Ioqs)	XP_019526614.1 XP_019526615.1 XP_019535385.1 XP_019535389.1 XP_019535396.1
																	obsolete in vectorbase (Ranbp21)	XP_019539679.1 XP_019539785.1	AALF001172
																	obsolete in vectorbase (Ran)	XM_019682735.2 XM_019682743.2 XM_019682752.2 XM_020076703.1 XM_020076704.1 XM_020076705.1 XP_019538280.1 XP_019538288.1 XP_019538297.1 XP_019932262.1 XP_019932263.1 XP_019932264.1
																	obsolete in vectorbase (gawky-A)	XP_019555935.1 XP_019555938.1 XP_019555939.1 XP_019555940.1 XP_019560930.1 XP_019560931.1 XP_019560932.1
																	obsolete in vectorbase (gawky-B)	XP_019560928.1 XP_019560929.1
																	obsolete in vectorbase (not1)	XP_019539288.1 XP_019539289.1 XP_019547155.1 XP_019547156.1
																	obsolete in vectorbase (not3)	XP_019558606.1
																	obsolete in vectorbase (twin)	XP_019527942.1 XP_019527943.1
																	obsolete in vectorbase (not11)	XP_019561811.1
																	obsolete in vectorbase (ago3)	XP_019540374.1 XP_019540376.1 XP_019565010.1 XP_019565011.1
																	obsolete in vectorbase (CG6967)	XP_019531730.1 XP_019539797.1 XP_019932536.1
